33 **These trade-offs between opposing flux directions can explain specialization of**  
34 **microorganisms for either glycolytic or gluconeogenic substrates and can help**  
35 **elucidate the complex phenotypic patterns exhibited by different microbial species.**

## 36 **Introduction**

37 Fast growth and quick physiological adaptation to changing environments are key  
38 determinants of fitness in frequently changing environments that microorganisms  
39 encounter in the wild. One example of such a switch happens when microbes deplete their  
40 primary nutrient. *Escherichia coli* preferentially utilizes hexose sugars like glucose that are  
41 metabolized via glycolysis (Gerosa et al., 2015a). To maximize growth on sugars, *E. coli*  
42 excretes substantial ‘overflow’ production of acetate, even the presence of oxygen (Basan  
43 et al., 2015a, 2017). This naturally leads to bi-phasic growth, where initial utilization of  
44 glucose is followed by a switch to acetate. Similar growth transitions from preferred  
45 glycolytic substrates to alcohols and organic acids ubiquitously occur for microbes in  
46 natural environments (Buescher et al., 2012; Otterstedt et al., 2004; Zampar et al., 2013).  
47 Since these fermentation products are all gluconeogenic, they require a reversal of the flux  
48 direction in the glycolysis pathway. In a previous work (Basan et al., 2020), we showed  
49 that multi-hour lag phases occur in shifts from glycolytic to gluconeogenic conditions and  
50 we observed a trade-off between growth rate and lag time, where faster growth before the  
51 shift resulted in long lag phases. We showed that these lag phases result from an inability  
52 of *E. coli* to establish net gluconeogenic flux, caused by the depletion of metabolite pools  
53 throughout the gluconeogenesis pathway, and similar observations were made for *Bacillus*  
54 *subtilis* and the yeast *Saccharomyces cerevisiae*. For organisms with preference for  
55 glycolytic substrates, we showed that shifts in the opposite direction, from gluconeogenic  
56 substrates to glycolytic ones, occur much more quickly, in some cases without detectable  
57 lag phases (Basan et al., 2020).

58

59 These findings raise several fundamental questions: Why do shifts from glycolytic to  
60 gluconeogenic conditions result in lag times of many hours, while shifts from  
61 gluconeogenic to glycolytic conditions only take minutes? Is this preference for glycolysis  
62 a fundamental property of central metabolism, or rather an evolutionary choice? And why  
63 are microorganisms like *E. coli* or *S. cerevisiae* unable to overcome lag phases by  
64 appropriate allosteric and transcriptional regulation? At the core of these questions, is a  
65 gap in understanding of how central carbon metabolism adjusts itself to nutritional changes.  
66 Because most organisms can use both glycolytic and gluconeogenic substrates as sole

67 carbon sources, central metabolism must self-organize to generate all required precursors  
68 for new biomass from both directions.

69

70 Over the last two decades metabolic models have made substantial progress in describing  
71 metabolism during steady state exponential growth, elucidating the flux and regulatory  
72 network that govern the coordination of microbial metabolism (Bennett et al., 2009; Bordbar  
73 et al., 2014; Chubukov et al., 2014; Gerosa et al., 2015b; Link et al., 2013; Noor et al.,  
74 2010, 2014; Vasilakou et al., 2016). Such metabolic model were successfully expanded to  
75 dynamics environments (Zampar et al., 2013; Chassagnole et al., 2002; Chakrabarti et al.,  
76 2013; Saa and Nielsen, 2015; Andreozzi et al., 2016; Yang et al., 2019), and used to gather  
77 vital information about metabolism, using perturbations (Link et al., 2013), stimulus  
78 response experiments (Chassagnole et al., 2002) or sequential nutrient depletion (Yang et  
79 al., 2019) to validate and improve metabolic models. But, dynamic changes of metabolism  
80 continue pose a considerable challenge, in particular when the proteome undergoes  
81 reorganization, as changes in enzyme abundances influence fluxes and metabolite  
82 concentrations, and vice-versa, metabolites regulate enzyme expression. The resulting  
83 explosion of parameters prevents accurately predicting how metabolism re-organizes, and  
84 how long this adaptation takes.

85

86 Here, we introduce a minimal kinetic model of central carbon metabolism to overcome this  
87 challenge. Our model focuses on the dynamics of key regulatory metabolites in central  
88 metabolism and couples metabolism to enzyme abundance, and enzyme expression to the  
89 concentration of regulatory metabolites, via allosteric and transcriptional regulation, flux  
90 dependent protein synthesis and growth. This self-consistent formulation of metabolism  
91 and growth bridges fast metabolic time scales with slow protein synthesis. As we  
92 demonstrate, our model can explain a major reorganization of metabolism in response to  
93 nutrients shifts: the switching on the directionality of metabolic flux between glycolysis  
94 and gluconeogenesis. Dependent on the required directionality of flux in central  
95 metabolism, enzymes catalyzing the required flux direction are expressed and catalytically  
96 active, while enzymes catalyzing the opposite flux are expressed at low levels and their  
97 activities are repressed by allosteric regulation. This self-organization is key for enabling

98 fast growth and preventing costly futile cycling between metabolic reactions in opposing  
99 directions, which can inhibit flux and deplete ATP in the process. Crucially, the model  
100 reveals a choice of one preferred flux direction determined by the relative strength of  
101 different allosteric regulations and imposes that lag phases are constrained by tradeoffs  
102 with the amount of futile cycling and growth rate before the switch.

103

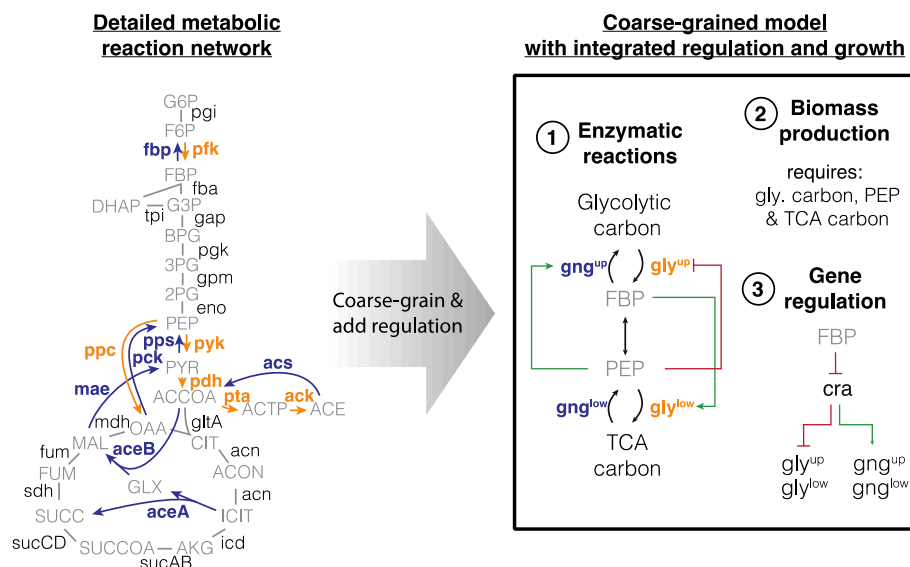

### Mathematical formulation

#### ① Enzymatic reactions

Enzyme kinetics (modified Michaelis-Menten)

$$r_i = \phi_i k_{cat,i} \frac{c_i}{c_i + K_{M,i}} (c_i/c_i^*)^{\alpha_i} \quad \text{Eq. (1)}$$

Kinetics of reversible 'super eno' reaction

$$\begin{aligned} r_{eno+} &= k_{eno+}^+ \phi_{eno} c_{FBP} \\ r_{eno-} &= k_{eno-}^- \phi_{eno} c_{PEP}^2 \end{aligned} \quad \text{Eqs. (2, 3)}$$

#### ② Biomass production

$$r_{BM} = k_{cat,BM} \frac{c_{GLY}}{c_{GLY}} \frac{c_{PEP}}{c_{PEP}} \frac{c_{TCA}}{c_{TCA}} \quad \text{Eq. (4)}$$

#### ③ Gene regulation

for gluconeogenic enzymes

$$\frac{d\phi_j}{dt} = \mu \left( \phi_j^* \left( (1 + x_j) - x_j \frac{c_{FBP}(t)}{c_{FBP}^*} \right) - \phi_j(t) \right) \quad \text{Eq. (5)}$$

for glycolytic enzymes

$$\frac{d\phi_i}{dt} = \mu \left( \phi_i^* \left( x_i - (1 - x_i) \frac{c_{FBP}(t)}{c_{FBP}^*} \right) - \phi_i(t) \right) \quad \text{Eq. (6)}$$

*Box 1 Integrated kinetic model of central carbon metabolism. The detailed metabolic reaction network of central carbon metabolism is coarse-grained to a minimal network, by combining irreversible glycolytic (orange) and gluconeogenic reactions (blue), as well as metabolites. Influx can either occur from glycolytic carbon sources (e.g. glucose) or TCA carbon sources (e.g. acetate). (1) Gatekeepers to the central section of glycolysis and gluconeogenesis are the two irreversible reactions ( $gly^{up}$ ,  $gng^{up}$  and  $gly^{low}$ ,  $gng^{low}$ ) that feed and drain FBP and PEP. The irreversible reactions are allosterically regulated by FBP (Fructose 1-6-bisphosphate) and PEP (phosphoenolpyruvate), where 'outward' facing reactions are activated (green arrows) and 'inward' facing reactions are repressed (red arrow). Fluxes  $r_i$  of enzymes  $i$  depend on enzyme abundances  $\phi_i$ , catalytic rates  $k_{cat,i}$  and allosteric regulations, modeled as a Hill function below its maximal saturation  $(c_j/c_j^*)^{\alpha_i}$ , where  $c_j$  is the concentration of the regulatory metabolite and  $c_j^*$  is a reference concentration. Reversible fluxes are modeled with simple mass action kinetics. (2) Biomass production requires precursors from glycolytic carbons, PEP and TCA carbons, and is implemented in the model as single reaction that drains all three metabolites simultaneously at catalytic rate  $k_{cat,BM}$ . (3) Glycolytic and gluconeogenic enzymes are regulated by Cra, which is in turn modulated by FBP. In the model, we assume enzyme expression to linearly depend on FBP concentration  $c_{FBP}$ . Growth rate:  $\mu$ , steady state abundance:  $\phi_i^*$ , steady state concentration  $c_{FBP}^*$  and  $x_i$  &  $x_j$  modulate the sensitivity of regulation to FBP. Glycolytic and gluconeogenic enzymes are produced as part of protein synthesis. Thus in the model, flux through metabolism automatically leads to synthesis of metabolic enzymes and biomass production, resulting in dilution of existing enzymes.*

## 104 **Results**

### 105 *An integrated, self-consistent kinetic model of glycolysis / gluconeogenesis*

106 Using a theoretical model we wanted to understand how microbes self-organize during  
107 glycolytic and gluconeogenic growth, and how the re-arrangement of this self-organization  
108 determines lag phases. The complexity of central metabolism with intertwined regulation  
109 at different levels in even comparably simply bacteria poses a challenge to quantitative  
110 mechanistic understanding because causal effects behind phenotypes are hard to trace to  
111 their molecular origins. We thus sought to construct a minimal model that focuses on the  
112 biochemical pathway topology in *E. coli*, and the key regulations that differentiate  
113 glycolysis and gluconeogenesis. The model, illustrated in Box 1, is based on topology of  
114 the biochemical network and allosteric and transcriptional regulation of  
115 glycolysis/gluconeogenesis that has been characterized for *E. coli* (Berger and Evans,  
116 1991; Ramseier et al., 1995; Johnson and Reinhart, 1997; Pham and Reinhart, 2001;  
117 Kelley-Loughnane et al., 2002; Hines et al., 2006; Fenton and Reinhart, 2009). The  
118 defining features of the model are a set of irreversible reactions (one-directional black  
119 arrows in ‘orange’ and ‘blue’, Box 1) in the upper and lower part of central metabolism.  
120 While not irreversible in an absolute sense, so-called irreversible reactions are  
121 thermodynamically favored so much in one direction that they can be effectively  
122 considered as irreversible (Noor et al., 2014). As a result, these irreversible reactions in the  
123 glycolysis/gluconeogenesis pathway are catalyzed by distinct enzymes, depending on the  
124 directionality of flux in the glycolytic or the gluconeogenic direction (‘bold font,  
125 blue/orange’). Expression levels of these key enzymes, combined with allosteric regulation  
126 and substrate levels, determine the flux through central metabolism.

127

128 There are two sets of irreversible reactions in *E. coli* central metabolism. First, the  
129 irreversible reaction between fructose-6-phosphate (F6P) and fructose 1,6-bisphosphate  
130 (FBP), catalyzed in the forward direction by 6-phosphofructokinase (PfkA) and backward  
131 by fructose-1,6-bisphosphatase (Fbp), which we refer to as *upper*  
132 *glycolysis/gluconeogenesis*, respectively. Second, two sets of enzymes that produce  
133 phosphoenolpyruvate (PEP) and pyruvate (PYR), respectively, which we coarse-grain into  
134 two effective enzymes, called *lower glycolysis/gluconeogenesis* (Box 1, left). While we do

135 not explicitly consider the pentose phosphate pathway in our model, it can effectively be  
136 considered as an irreversible reaction of upper glycolysis (Stincone et al., 2015).

137

138 In *E. coli*, the activity of enzymes at these irreversible reactions is controlled by several  
139 known allosteric interactions: FBP allosterically activates lower glycolysis PykF (Valentini  
140 et al., 2000), whereas PEP allosterically inhibits PfkA (Pham and Reinhart, 2001) and  
141 activates Fbp in upper glycolysis (Hines et al., 2006). Due to their central role we model  
142 the dynamics of FBP and PEP explicitly using modified Michaelis-Menten kinetics (Box  
143 1, Eq. (1)). The flux that links FBP and PEP is the result of a series of reversible enzymatic  
144 reactions (see Box 1, left), which we coarse-grain into a single reversible reaction (‘super-  
145 eno’, bidirectional black arrow in Box 1, right) and model with mass action kinetics (Box  
146 1, Eqs. (2, 3)).

147

148 To accurately model growth transitions, biomass production must be taken into account.  
149 Biomass production is connected to our model in three ways. First, biomass production  
150 requires metabolites and thus drains them from the metabolic network, which in our case  
151 concerns three coarse-grained glycolytic intermediates with a specific stoichiometric ratio  
152 that is set by the biomass composition (Supporting Information, Sec. 3.7). This biomass  
153 production yields a drain of the three metabolites, modeled by linear dynamics (Box 1, Eq.  
154 (4)). Second, part of the newly synthesized biomass are the enzymes themselves, which are  
155 primarily regulated by the transcription factor Cra in *E. coli* (Cortay et al., 1994; Ramseier  
156 et al., 1995), which is itself repressed by binding of the metabolite Fructose-1-phosphate,  
157 closely related to fructose 1-6-bisphosphate (FBP) (Folly et al., 2018). As a first-order  
158 approximation, we assume that the expression level of glycolytic and gluconeogenic  
159 enzymes linearly depends on FBP (Kochanowski et al., 2013a) (Box 1, Eqs. (5-6)), which  
160 will be sufficient to reproduce the empirical enzyme abundances, as we will see later in the  
161 text. Third, biomass accumulation is equivalent to growth and results in dilution of existing  
162 enzymes proportional to growth rate (Box 1, Eqs. (5-6)).

163

164 In total, the model encompasses four irreversible reactions, each regulated allosterically by  
165 either FBP or PEP, and transcriptionally by FBP via cra, and one reversible reaction that



166 connects FBP and PEP. We used measured metabolite concentrations for growth on  
 167 glucose (Kochanowski et al., 2013a) and Michaelis constants (Berman and Cohn, 1970;  
 168 Zheng and Kemp, 1995; Donahue et al., 2000) to constrain enzymatic parameters, and  
 169 biomass yield (Link et al., 2008) and density (Basan et al., 2015b) on glucose to constrain  
 170 fluxes. We used the level of futile cycling in the upper and lower reactions in exponential  
 171 glucose growth conditions as fitting parameters such that the model reproduces the  
 172 observed lag times in this paper, see SI Sec. 3.2 for details.

173

174 *Central carbon metabolism self-organizes in response to substrate availability*

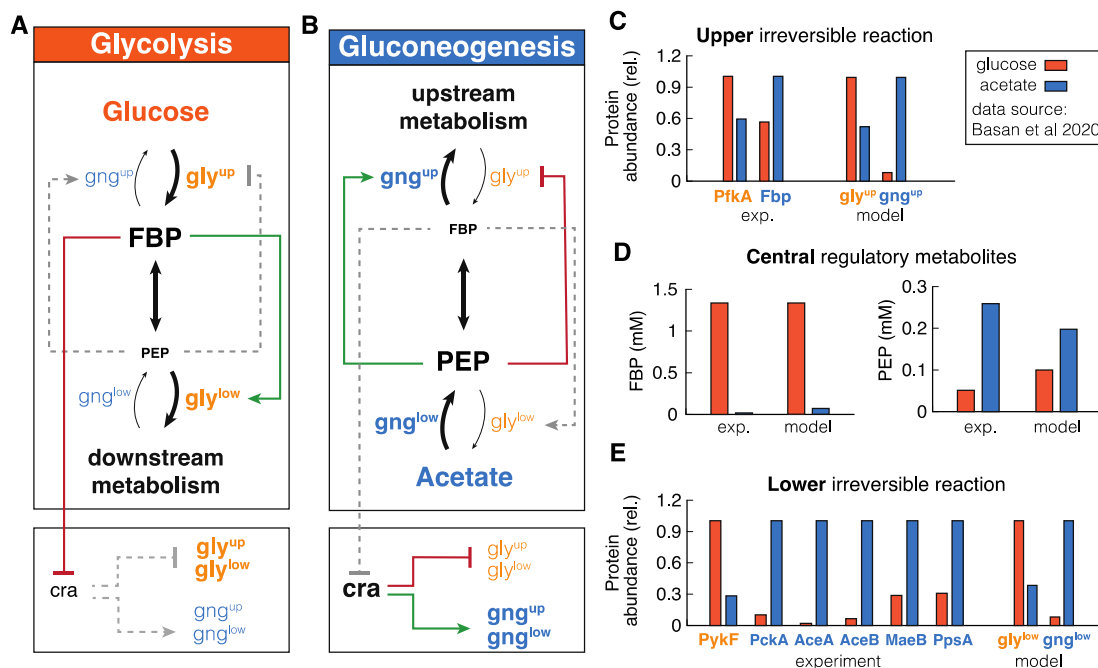

*Figure 1 Self-organization of metabolism in glycolysis and gluconeogenesis (A & B) Graphic summary of the reorganization in glycolysis and gluconeogenesis. Linewidth of reactions arrows indicate magnitude of flux. Font size of metabolites and enzymes indicate metabolite concentrations and enzyme abundances, respectively. Active regulation is indicated by red/green color, inactive regulation is grey and dashed. (C, D & E) Comparison of theoretical and experimental (from [3]) metabolite concentrations and enzyme abundances. Note the striking, differential regulation of FBP and PEP, high in one condition and low in the other.*

175 To test whether this simple model could recapitulate steady-state glycolytic and  
 176 gluconeogenic growth conditions for *Escherichia coli*, we compared it to published  
 177 metabolite and proteomics data for steady state exponential growth on glucose and acetate  
 178 as sole carbon substrates (Basan et al., 2020). Indeed, the model reached distinct steady-

179 states for glycolytic (Fig. 1A) and gluconeogenic conditions (Fig. 1B), consistent with  
 180 experimental measurements Fig. 1C-E. The simulation elucidates how central metabolism  
 181 self-organizes in response to glycolytic and gluconeogenic conditions and how allosteric  
 182 and transcriptional regulation helps to optimize fluxes and minimize futile cycling. As  
 183 shown in Fig. 1C, in ‘orange’, during glycolytic conditions, the simulation reached a  
 184 steady-state with high FBP levels and low PEP levels, consistent with experimental  
 185 metabolite measurements for FBP and PEP during growth on glucose. As illustrated in Fig.  
 186 1A, high FBP pool activates lower glycolysis, while the low PEP pool derepresses upper  
 187 glycolysis and deactivates upper gluconeogenesis. This suppression of gluconeogenic  
 188 fluxes in glycolysis reduces futile cycling, i.e., circular fluxes at the irreversible reactions,  
 189 thereby streamlining metabolism.  
 190

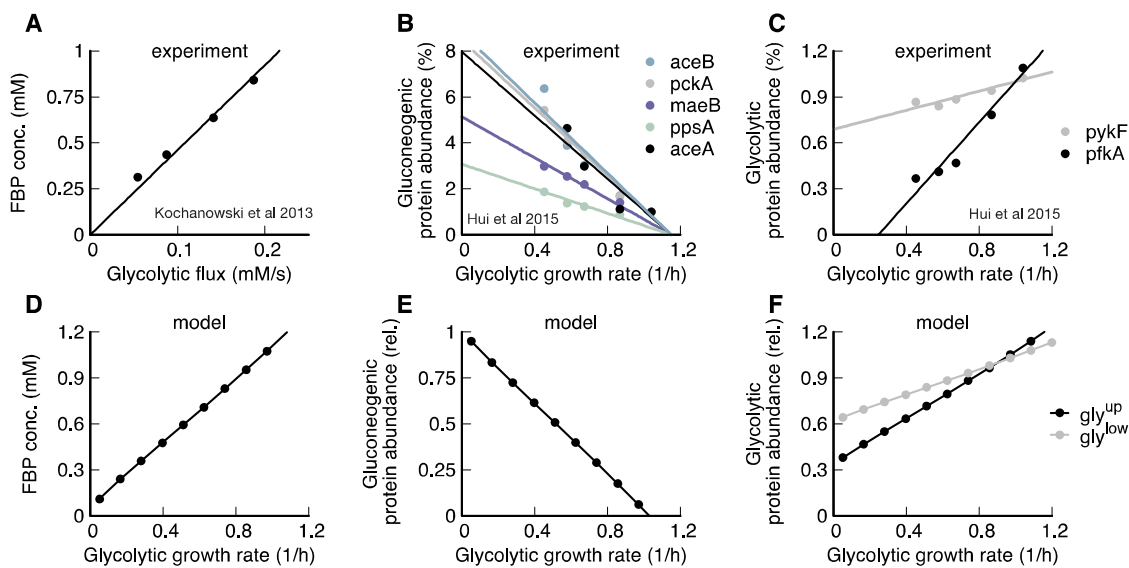

191  
 192 *Figure 2 Metabolic state depends on growth rate. A During glycolytic growth, FBP linearly increases with growth*  
 193 *rate. Data: Ref. (Kochanowski et al., 2013b). B Gluconeogenic enzymes decrease linearly with glycolytic growth rate.*  
 194 *Data: (Hui et al., 2015). C Glycolytic enzymes increase linearly with glycolytic growth rate. Data: Ref. (Hui et al., 2015).*  
 195 *D-F Simulation results recapitulate experimental evidence.*

196 On a transcriptional level, the high FBP pool represses Cra, which in turn derepresses the  
 197 expression of glycolytic enzymes and inhibits the expression of gluconeogenic enzymes.  
 198 This results in high levels of glycolytic enzymes and low levels of gluconeogenic enzymes  
 199 in the simulation (Fig. 1D & E, right panels), consistent with experimental findings from  
 200 proteomics measurements (Fig. 1D & E, left panels).

201

202 In gluconeogenic conditions ('blue' in Fig. 1), we find precisely the complementary  
203 configuration of central carbon metabolism. Simulation and experiments show low FBP  
204 and high PEP pools (Fig. 1C). As illustrated in Fig. 1B, high PEP represses upper glycolysis  
205 and activates upper gluconeogenesis, while low FBP deactivates lower glycolysis. Low  
206 FBP also derepresses Cra, which leads to high expression of gluconeogenic enzymes and  
207 low expression of glycolytic enzymes (Fig. 1D, right panels), consistent with proteomics  
208 measurements (Fig. 1D & E, left panels).

209

210 Next we tested if the model could recapitulate how varying growth rates on glycolytic and  
211 gluconeogenic nutrients affects metabolite levels and protein expression (Gerosa et al.,  
212 2015a; Hui et al., 2015). In particular, it has been shown experimentally that FBP acts like  
213 a flux sensor and FBP concentration linearly increases with glycolytic flux (Fig. 2A, upper  
214 panel) (Kochanowski et al., 2013b), which is captured by our simulation (Fig. 2B), under  
215 the condition that the speed of the reversible reaction is slow compared to irreversible  
216 reactions. In this limit, PEP will be drained fast enough for the backward flux, Eq. (6), to  
217 be small, so that the net flux is dominated by the forward flux, Eq. (5), which is proportional  
218 to FBP. The linear increase of FBP concentration with growth rate results in a linear growth  
219 rate dependence of gluconeogenic and glycolytic enzyme abundances in the simulation, in  
220 good agreement with experimental measurements of enzyme abundances from proteomics  
221 (Fig. 2 compare B&C with E&F) (Hui et al., 2015). Together, these results show how  
222 central metabolism self-organizes dependent on the nutrient source, and that transcriptional  
223 and allosteric regulation of FBP and PEP alone suffice to achieve this major re-  
224 configuration.

225

226 *Central carbon metabolism is primed for switches to glycolysis*

227 Equipped with this model, we next address the question of understanding the mechanistic  
228 basis for the extended lag phases of *E. coli* upon nutrient shifts from glycolytic to  
229 gluconeogenic conditions (Basan et al., 2020; Kotte et al., 2014). After a shift from glucose  
230 to acetate, *E. coli* shows a long lag time with almost absent growth for around 5 h (Fig.  
231 3A) (Basan et al., 2020), which can be captured by our model (Fig. 3B), if we fit pre-shift

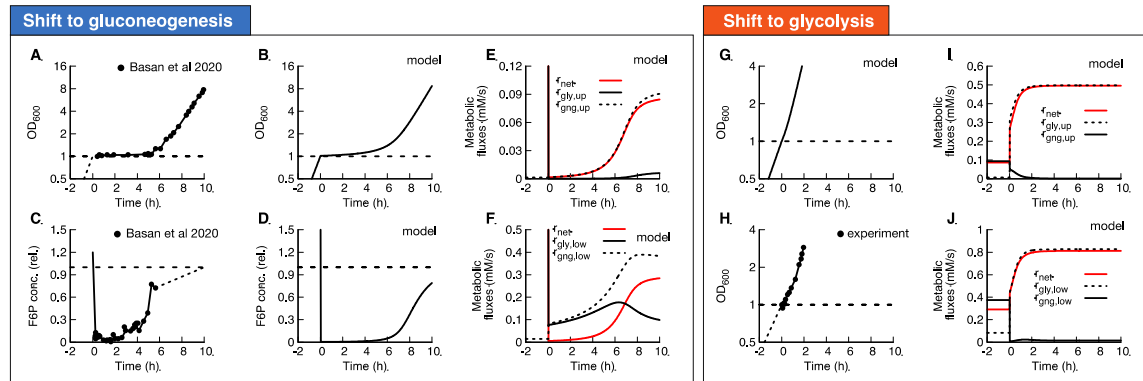

Figure 3 Shifts between glycolysis and gluconeogenesis. (A) Experimental and (B) model of optical density after shift of *E. coli* from glucose to acetate. Growth shows a substantial lag before it recovers. (C) Experimental and (D) model of F6P (normalized to the final state) collapses after shift to acetate, and continues to stay low throughout lag phase. Because F6P is an essential precursor for biomass production, this limitation effectively stops biomass growth. (E&F) Fluxes of all irreversible reactions. Especially fluxes in lower glycolysis/gluconeogenesis are of equal magnitude, leading to a futile cycle, where no net flux (red line) through central carbon metabolism can be established. (G-J) Optical density and metabolic fluxes for the reversed shift from acetate to glucose shows immediate growth and no intermittent futile cycling. The dynamics of all enzyme abundances, regulation and fluxes for both shifts are shown in Fig. S1-5 in detail. The model also correctly predicts that enzyme abundances only adapt late in the lag phase (Fig. S6).

232 futile cycling accordingly, see SI Sec. 3.2 for details. All model solutions shown in this  
 233 paper are generated with the parameters generated from this fit. The model captures the  
 234 slow adaptation of glycolytic and gluconeogenic enzymes, which only towards the end of  
 235 the lag phase significantly change towards their new steady state values (Fig. S6).  
 236 Investigating the origin of the growth arrest in the simulation, we found that during lag  
 237 phase, the concentrations of upper glycolytic precursors (which includes F6P, G6P and  
 238 above) remained very low compared to their steady-state values, which matches published  
 239 experimental evidence of F6P measurements (Basan et al., 2020) (Fig. simulation: 3C, data  
 240 3D), indicating that the gluconeogenic flux limits formation of essential precursors for  
 241 biomass formation. Thereby, according to Eq. (4) the depletion of this precursor limits  
 242 growth rate during lag phase.

243

244 In the simulation, the F6P limitation is caused by low net fluxes in upper and lower  
 245 gluconeogenesis (Fig. 3E & F, red lines). Previously, it was suggested that futile cycling  
 246 between gluconeogenic and glycolytic enzymes could contribute to this flux limitation  
 247 (Basan et al., 2020), supported by the observation that overexpression of glycolytic

248 enzymes in upper or lower glycolysis strongly impaired switching and resulted in much  
249 longer lag times (Basan et al., 2020). The simulation allows us to probe the effect of futile  
250 cycling *in silico*, which cannot be directly measured experimentally. Indeed, we found for  
251 our default *E. coli* parameters that residual lower glycolytic flux almost completely  
252 canceled the flux from gluconeogenesis, i.e.,  $r_{\text{gly}}^{\text{low}} \approx r_{\text{gng}}^{\text{low}}$  (solid and dashed black lines in  
253 Fig. 3F), such that net flux remained close to zero (red line, Fig. 3E & F). Thus, this futile  
254 cycling appears to be the main reason for limiting net flux throughout the lag phase.

255

256 The biochemical network and regulation are almost completely symmetric with respect to  
257 the direction of flux, so one might naively expect a shift from gluconeogenesis to glycolysis  
258 to also result in a long lag. However, experimentally the shift in the opposite direction from  
259 gluconeogenesis to glycolysis occurs very quickly in *E. coli* (Fig. 3G) (Basan et al., 2020).  
260 Indeed, in simulations with our standard *E. coli* parameters, we found that central  
261 metabolism adjusted very quickly and growth resumed without a substantial lag phase (Fig.  
262 3H). In striking contrast to the shift to gluconeogenesis, futile cycling played no role in the  
263 shift to glycolysis, because both upper and lower glycolytic fluxes got repressed  
264 immediately after the shift (Fig. 3I-J, solid black line), such that net flux can build up (Fig.  
265 3I-J, red line). The absence of transient futile cycling, despite the symmetry of regulation  
266 and metabolic reactions, suggests that in *E. coli* allosteric and transcriptional regulations  
267 are ‘primed’ in the glycolytic direction.

268

### 269 *Molecular cause of preferential directionality*

270 To understand the molecular cause of the asymmetric response and lag phases, we  
271 investigated the role of allosteric and transcriptional regulation in our simulation. During  
272 steady state growth, the differential regulation during glycolysis and gluconeogenesis is  
273 achieved by PEP and FBP, the metabolites that are “sandwiched” between the two  
274 irreversible reactions and connected by a series of reversible enzymes, coarse-grained in  
275 our model into the ‘super-enolase enzyme’. First, we focused on regulation during  
276 exponential growth and wanted to investigate how the cell achieves differential regulation  
277 of glycolytic and gluconeogenic enzymes using the metabolites FBP and PEP. In  
278 equilibrium, forward and backward reactions would balance, i.e.,  $r_{\text{ENO}^+} = r_{\text{ENO}^-}$ , and no

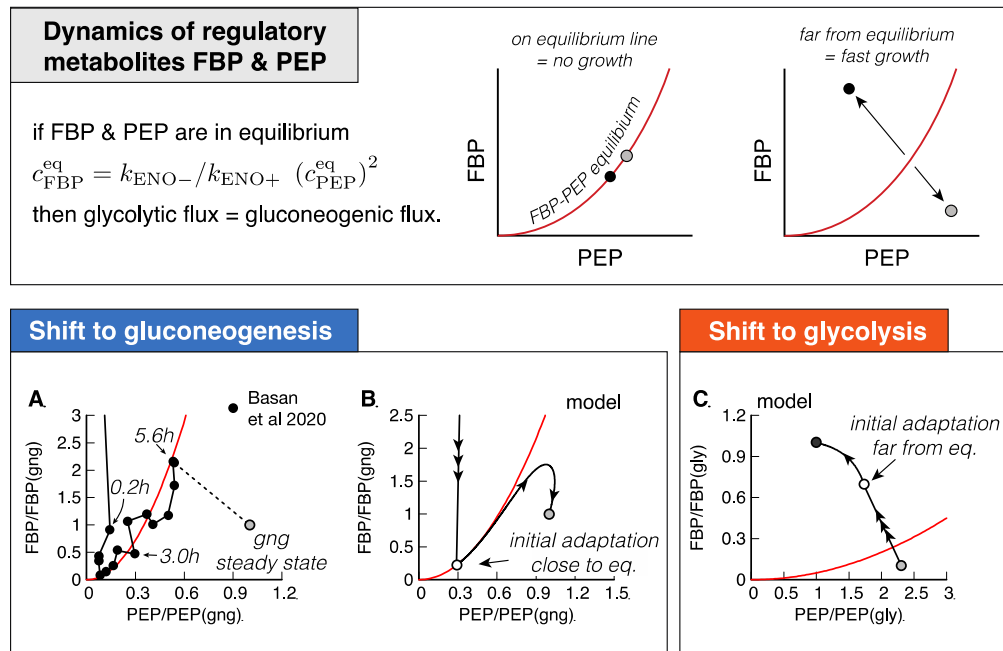

Figure 4 Molecular cause for asymmetric recovery dynamics. (top) Graphical summary of dynamics of the regulatory metabolites FBP and PEP. Distance from the quadratic equilibrium line determines net metabolic flux and thus growth rate. (A) Recovery of FBP and PEP of after a shift from glucose to acetate, shows a distinctive joint increase, followed by an overshoot of FBP. Data from Ref. [4]. Red line is a quadratic guide to the eye. Final acetate steady state is drawn as grey symbol. (B) Model solution of FBP and PEP. After the fast collapse of metabolite levels (triple arrow to white circle), the dynamics closely follows the quadratic FBP-PEP equilibrium Eq. ( **Error! Reference source not found.** Eventually recovery will diverge away from the equilibrium line, towards the non-equilibrium steady states of gluconeogenesis (grey circle) (C) For a shift to glycolysis, metabolite levels do not collapse, but instead land already far from equilibrium (triple arrow to white circle), such that flux is immediately established, and recovery is quick.

279 net flux can run through central metabolism, meaning that the cell cannot grow. Using Eqs.  
 280 (2 & 3), the balance of forward and backward fluxes results in a fixed quadratic dependence  
 281 of FBP and PEP in equilibrium,

$$c_{\text{FBP}}^{\text{eq}} = k_{\text{ENO-}}/k_{\text{ENO+}} (c_{\text{PEP}}^{\text{eq}})^2. \quad (7)$$

282

283 In Figure 4 (top), we show a visual representation of the FBP-PEP relation. Close to the  
 284 equilibrium, FBP and PEP levels go up and down together, rather than the opposing  
 285 directions, as observed for glycolytic and gluconeogenic growth (Fig. 1A&B). This results  
 286 in low net-flux and creeping growth. Hence, in steady state growth conditions, the

287 equilibrium must be broken and  $FBP \gg PEP$  or  $FBP \ll PEP$ , such that either glycolytic  
288 flux is bigger than gluconeogenic, or vice-versa ( $r_{ENO+} \gg r_{ENO-}$  and  $r_{ENO+} \ll r_{ENO-}$ ,  
289 respectively). This is achieved by the irreversible reactions, which drain and supply  
290 metabolites to the ‘super-enolase’. Because of the positive feedback between enzyme  
291 activity and non-equilibrium of the ‘super-enolase’, this regulation topology achieves  
292 differential regulation during glycolysis and gluconeogenesis. As we observed in the  
293 analysis of the glycolytic and gluconeogenic steady-states (Fig. 1), this differential  
294 regulation adjusts enzyme levels via transcriptional regulation and suppresses futile cycling  
295 at the irreversible reactions.

296

297 While regulation of central metabolism efficiently organizes FBP-PEP in a far from  
298 equilibrium state during exponential growth, nutrient shifts expose the limitations of this  
299 regulatory system. Metabolite measurements in the shift of *E. coli* from glucose to acetate  
300 show that levels of FBP and PEP drop within minutes of the shift to acetate, followed by a  
301 very slow joint increase of FBP and PEP over the course of hours, constituting the majority  
302 of the lag phase (Fig. 4A). This joint increase, rather than a differential increase, is the  
303 hallmark of a close-to-equilibrium state.

304

305 The slow recovery can be understood from the simulation, which shows that FBP and PEP  
306 proceed close to the equilibrium line of Eq. (7), where growth is slow (Fig. 4B). Strikingly,  
307 as shown in Fig. 3F, throughout most of the lag phase, higher gluconeogenic flux from  
308 increasing levels of gluconeogenic enzymes is almost completely lost to a corresponding  
309 increase in futile cycling, because increasing FBP activates lower glycolysis (instead of  
310 deactivating it) and thereby increases futile cycling. The overshoot of FBP in Fig. 4A (data)  
311 and Fig. 4B (model) corresponds to the breaking of the equilibrium, that finally allows the  
312 cell to establish net flux: PEP concentration is high enough to activate upper  
313 gluconeogenesis sufficiently to drain FBP via upper gluconeogenesis (see Fig. 3E). Lower  
314 FBP then shuts down futile cycling in lower glycolysis/gluconeogenesis (Fig. 3F), pushing  
315 FBP and PEP concentrations to a state far from the equilibrium line (see Fig. 4B) and  
316 allowing the cell to grow at a faster rate.

317

318 The fundamental difference between shifts to gluconeogenesis and glycolysis is that  
319 glycolytic shifts immediately land far from equilibrium (Fig. 4C, triple arrow to white  
320 circle), such that cells immediately grow at faster rates, allowing them to express the new  
321 enzymes needed to recover quickly. Thus, to understand why glycolytic shifts recover  
322 faster than gluconeogenic shifts, we need to understand why glycolytic shifts immediately  
323 land far from equilibrium, while gluconeogenic shifts land close to equilibrium.  
324



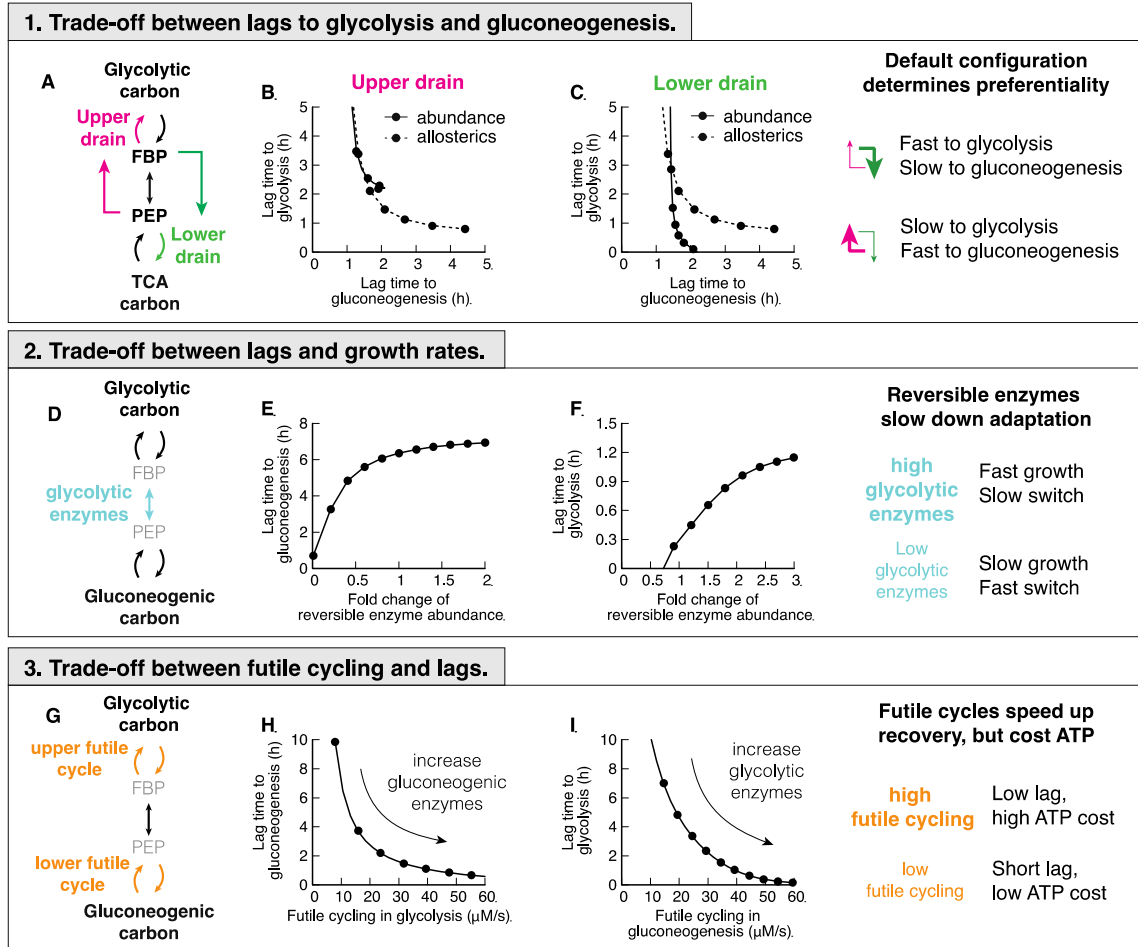

*Figure 5 Trade-offs between glycolysis and gluconeogenesis. (A) Two drains in central metabolism deplete central metabolites. (B-C) Changing abundance  $\phi$  or allosteric regulation strength  $\alpha$  in either lower or upper drain leads to a shift of lag times, decreasing lags in one direction at the cost of the other. Choosing strength of the drains such that either top or bottom is stronger, will lead to a fast recovery in one direction, and a slow in the other. (D) Reversible enzymes in the central metabolism (coarse-grained here into 'super-eno'). Abundance of reversible enzymes scale linearly with growth rate [16]. (E-F) Decreasing abundance of reversible enzymes decreases lag times. This effect is due to regulatory metabolites being in a far-from-equilibrium state when abundances are low, which allows differential regulation via FBP and PEP. For high abundance, regulation is weak and lag times long. (G) There are two futile cycles in central metabolism. (H-I) Increasing abundance of enzymes of the opposing direction in pre-shift, e.g. gluconeogenic enzymes in glycolytic growth, increases futile cycling and decreases lag times. Because in futile cycles free energy is dissipated, usually in the form of ATP hydrolysis, futile cycling has an energetic cost.*

325 Three trade-offs constrain lag times to glycolysis and gluconeogenesis

326 The out-of equilibrium state is caused by net flux going through metabolism. Therefore,

327 we investigated what causes fluxes not to flow in a uniform direction after shifts to

328 glycolysis and gluconeogenesis. In principle, metabolite flux brought into central

329 metabolism can exit via two drains: upper gluconeogenesis, activated by PEP, and lower

330 glycolysis, activated by FBP (Fig. 5A). If the strength of the lower drain is stronger than

331 the upper drain, then after a switch to glycolysis, FBP builds up, PEP is drained and a net

332 flux is immediately accomplished. In a shift to gluconeogenesis, however, the lower drain  
333 leaks the influx coming from the bottom, as seen in Fig. 3F, leading to an in-and-out flux,  
334 but no net flux. In this situation, FBP and PEP stay in equilibrium and the recovery stalls.  
335 If on the other hand, the upper drain was stronger than the lower drain, then we would  
336 expect the behavior to be reversed and gluconeogenic flux would be immediately  
337 accomplished, while the glycolytic recovery would stall.

338

339 In the simulation, we are able test the hypothesis that the strength of the upper and lower  
340 drains determines the preferential directionality of the central metabolism (Fig. 5B&C) by  
341 varying enzyme abundances and the strength of allosteric interactions in upper (pink) and  
342 lower drains (green) *in silico*, and letting metabolism adapt to gluconeogenesis and  
343 glycolysis conditions. Indeed, we found that a decrease of lag time in one direction led to  
344 an increase of lag time in the opposite direction.

345

346 Varying the outflow from metabolism is not the only determinant of lag times. The set of  
347 reversible enzymes, coarse-grained in our model into ‘super-eno’, plays another key role,  
348 because they interconvert the regulatory metabolites FBP and PEP (Fig. 5D). If this  
349 conversion is fast, the concentrations of FBP and PEP will be close to their equilibrium  
350 relation in Eq. (7), and differential regulation is impossible. As a result, lag times in both  
351 directions increase if the abundance of reversible reactions increase (Fig. 5E-F). This is a  
352 counter-intuitive result, as one would have naïvely expected more enzymes to speed up  
353 reactions. But instead, in metabolism more enzymes will collapse the differential regulation  
354 and slow down adaptation rates. Because the cell needs to scale the abundance of reversible  
355 glycolytic enzymes with growth rate to catalyze sufficient flux through metabolism, the  
356 relation between reversible enzyme abundance and lag time is in fact a fundamental trade-  
357 off between growth rate and lag time.

358

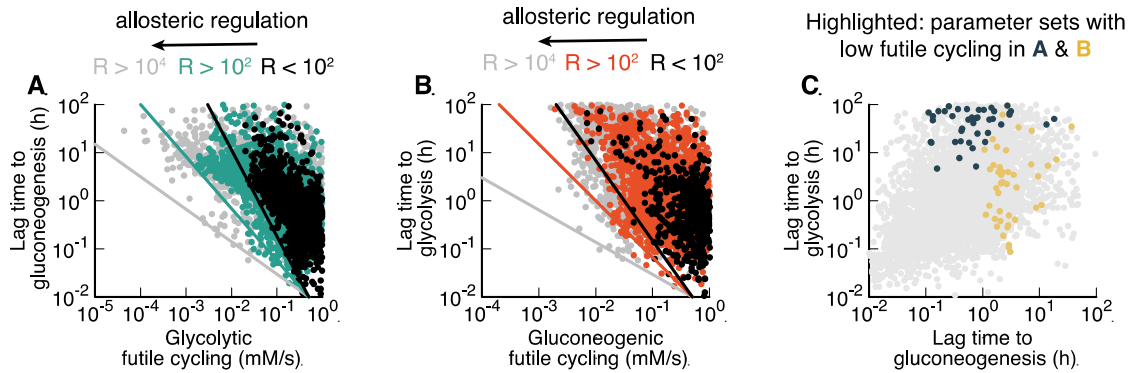

*Figure 6 Large-scale parameter scan reveals Pareto optimality between lag times and futile cycling. (A-B) Model calculated for randomized protein abundancies, reaction rates, Michaelis constants, allosteric interactions, transcriptional regulation, see SI. Each point corresponds to a parameter set that allows exponential growth on both glycolytic and gluconeogenic carbons, as well switching between both conditions. Data is colored according to the total regulation  $R$ , i.e., sum of fold-changes of enzyme activities between glycolysis and gluconeogenesis,  $(c_i^{gly}/c_i^{gn.g})^{\alpha_i}$ . For standard *E. coli* parameters  $R = 23$ .  $R > 10^4$  are likely unphysiological. Lines indicate Pareto front. (C) Parameter sets from panels A&B with low futile cycling highlighted over the background of all parameter sets (grey).*

359 Finally, we found that while lag times are constrained by the two above trade-offs, they  
 360 can be substantially decreased if the cell allows more futile cycling, i.e., the circular  
 361 conversion of metabolites in the upper and lower irreversible reactions that dissipates ATP  
 362 (Fig. 5G). Increasing the abundance of gluconeogenic enzymes in glycolytic growth (Fig.  
 363 5H) or glycolytic enzymes in gluconeogenic growth (Fig. 5I) substantially decreases lag  
 364 times at the cost of futile cycling, which dissipates free energy in the form of ATP. This  
 365 third trade-off thus allows organisms to decrease their switching times by sacrificing  
 366 energetic efficiency.

367

368 Because the three trade-offs of Fig. 5 are based on a single parameter set, the same as in  
 369 Fig. 1-4, we wondered if different biochemical parameters and regulations could break the  
 370 trade-offs and allow simultaneous fast growth and fast switching without costly futile  
 371 cycling. To investigate this possibility, we performed an extensive scan of model  
 372 parameters, by randomly choosing sets of biochemical parameters and simulating the  
 373 resulting model. Of those parameter sets, we chose those that allowed steady state growth  
 374 in both glycolytic and gluconeogenic conditions, and were able to switch between both  
 375 states. We found that metabolism in the majority of randomly generated models is  
 376 inefficient and dominated by futile cycling in upper and lower glycolysis; only a minority  
 377 of models were able to reduce futile cycling in glycolysis and gluconeogenesis.

378 Remarkably, despite probing variations of all possible model parameters, including  
379 Michaelis Menten parameters of enzymes and the strengths of allosteric and transcriptional  
380 regulation, lag times could not be reduced at-will by the cell. Instead, a ‘Pareto frontier’  
381 between futile cycling in preshift conditions and lag times emerged (Fig. 6 A&B). Points  
382 close to the ‘Pareto frontier’ (solid lines) are Pareto-optimal, meaning that any further  
383 decrease of either parameter must come at the expense of the other. Overall, stronger  
384 allosteric regulation (black:  $R < 10^2$ , red/green:  $R > 10^2$ , grey:  $R > 10^4$ ) shifted the Pareto  
385 frontier, but was not able to overcome it. Parameter combinations that led to low futile  
386 cycling in either glycolysis or gluconeogenesis showed long lag times in at least one  
387 condition (Fig. 6C). Thus, from this analysis, it seems that organisms cannot overcome  
388 long lag times without paying a futile cycling cost during steady-state growth.

389

390 *Pseudomas aeruginosa is at the other end of Pareto spectrum*

391 Taken together, the results of Fig. 5 & 6 suggest that the cell cannot achieve fast growth,  
392 low futile cycling and fast adaptation simultaneously in both glycolysis and  
393 gluconeogenesis. Instead, each of the three trade-offs will constrain the evolutionary  
394 optimization of microbial metabolism, such that any optimal solution is on a the surface of  
395 a multidimensional Pareto frontier, where any improvement in one phenotype will come at  
396 the expense of another.

397

398 Because the preference is solely determined by biochemical parameters that are not  
399 strongly constrained, such as strengths of allosteric regulations and enzyme abundances, it  
400 could be reversed during evolutionary adaptation if bacteria evolve on gluconeogenic  
401 substrates. From the model, we expect that microbes should exist that show precisely the  
402 opposite phenotypic pattern of *E. coli*: fast switching to gluconeogenic substrates, where  
403 *E. coli* shows long lag phases, and slow switching to glycolytic substrates, where *E. coli*  
404 adapts quickly.

405

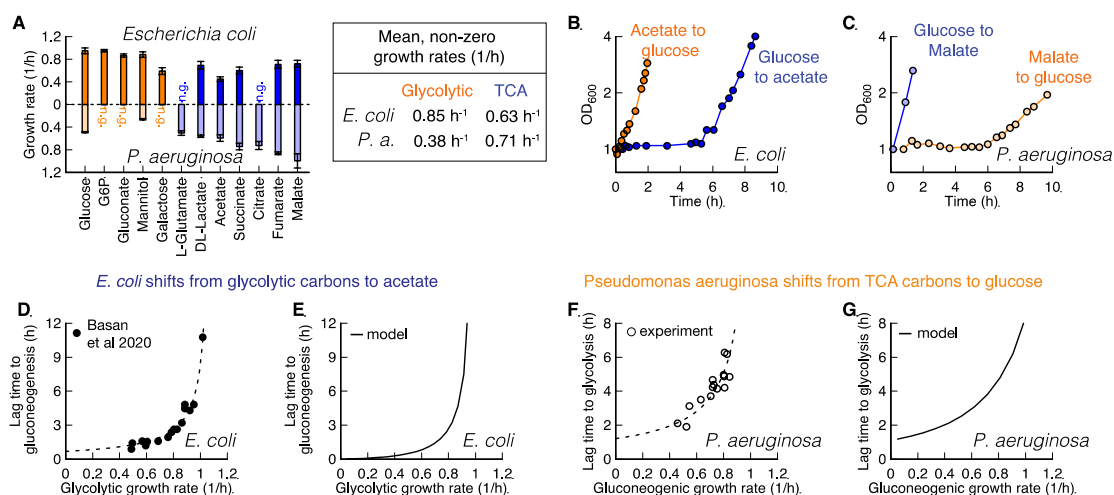

406

407 *Figure 7 Comparison of Escherichia coli and Pseudomonas aeruginosa during growth and shifts. (A) Growth rates on*  
 408 *glycolytic carbons (orange) are faster for E. coli than on gluconeogenic carbons (blue). For Pseudomonas, this*  
 409 *dependence is reversed. No growth indicated with “n.g.”. (B-C) Shifts for E. coli and P. aeruginosa between glycolytic*  
 410 *and gluconeogenic carbon substrates. The preferential order of P. aeruginosa is reversed in comparison to E. coli (D)*  
 411 *E. coli shows an increase of lag times to gluconeogenesis with increasing pre-shift growth rate. Lag times diverge*  
 412 *around growth rate 1.1/h. (E) The model predicts diverging growth rates without further fitting, based on the growth*  
 413 *rate dependent expression levels of glycolytic and gluconeogenic enzymes (Fig. 2E-F). (F) P. aeruginosa shows a*  
 414 *strikingly similar growth rate to lag time dependence as E. coli, when switched to glycolysis, with lag times diverging*  
 415 *around 1.0/h. (G) The model can recapitulate observed P. aeruginosa lag times if pre-shift glycolytic enzymes are*  
 416 *decreased as a function of pre-shift growth rate.*

417 One possible example of such microbes are *Pseudomonas* species, which have been  
 418 reported to show diauxie when switching from glycolytic to gluconeogenic substrates  
 419 (Lynch and Franklin, 1978). Therefore, we tested the model predictions in a strain of the  
 420 clinically relevant species, *P. aeruginosa*. Indeed, we found that *P. aeruginosa* grew faster  
 421 on gluconeogenic carbon substrates, than on glycolytic carbon substrates, which is the  
 422 opposite preference of *E. coli* (Fig. 7A). In addition, *P. aeruginosa* showed the reversed  
 423 lag time phenotypes compared to *E. coli* (compare Fig. 7C & D), i.e. short lag phase when  
 424 shifted from glycolysis (glucose) to gluconeogenesis (malate), but a long lag phase in the  
 425 opposite direction. (Fig. 7C).

426

427 In Basan et al (Basan et al., 2020) it was shown that lag times to gluconeogenesis for *E.*  
 428 *coli* depend on the pre-shift growth rate (Fig. 7D). Our kinetic model captures the  
 429 divergence of lag times at fast growth rate, simply by varying the carbon uptake rate in the  
 430 pre-shift condition (Fig. 7E), because the increase of lag time is caused by the linear  
 431 decrease of gluconeogenic enzyme abundance (Fig. 2B), and increase of glycolytic enzyme  
 432 abundance (Fig. 2C) with faster growth rate, which are already implemented via the FBP-

433 cra regulation in the model (see Box 1). While glycolytic enzymes are required to ensure  
434 sufficient glycolytic flux, the reduction of gluconeogenic enzymes reduces the backward  
435 flux that causes futile cycling.

436

437 If *Pseudomonas aeruginosa* is subject to the same trade-offs as *E. coli*, then we expect it  
438 to have evolved a similar regulation. Fast growing *P. aeruginosa* should have a low  
439 abundance of glycolytic enzymes, to reduce futile cycling and allow efficient growth. Slow  
440 growing *P. aeruginosa* should have higher glycolytic abundance and show shorter lag  
441 times. To test this hypothesis, we grew *P. aeruginosa* on a variety of TCA carbons (same  
442 as in Fig. 6A) and shifted to glucose. Indeed, we observe an increase of lag time for faster  
443 growth that is remarkably similar to what we previously found for *E. coli* (Fig. 6F). The  
444 increase of lag times can be captured by the model, by varying the expression of glycolytic  
445 enzymes, i.e. varying futile cycling, in the pre-shift condition (Fig. 6E). This demonstrates  
446 that *P. aeruginosa* is constrained by the same trade-offs between growth and lag that are  
447 present for *E. coli*. However, in contrast to *E. coli*, *P. aeruginosa* appears to have  
448 evolutionarily chosen a different objective, and evolved fast and efficient gluconeogenic  
449 growth, as well as fast switching to gluconeogenesis. *P. aeruginosa* is thus located at the  
450 opposite spectrum of the Pareto frontier compared to *E. coli*.

451

## 452 **Discussion**

453 In this work, we presented a self-consistent, coarse-grained kinetic model of central carbon  
454 metabolism, combining key allosteric and transcriptional regulation, as well as biomass  
455 production, enzyme synthesis, and growth. This model elucidates the remarkable capacity  
456 of central carbon metabolism to self-organize in response to substrate availability and flux  
457 requirements. The simulation successfully recapitulates enzyme and metabolite levels for  
458 different glycolytic growth rates, as well as growth rate and metabolite dynamics of growth  
459 shifts, as measured previously in *E. coli*. But the model also reveals key limitations to this  
460 flux-sensing based self-organization that can only be partially overcome at a cost  
461 determined by three fundamental tradeoffs between growth rate, futile cycling and lag times  
462 for shifts to the non-preferred direction. This suggests that central carbon metabolism  
463 inherently has a preferred flux direction that should evolve in different organisms,

464 depending on the ecological environment and preferential substrate utilization. We  
465 validated this key model prediction in a different bacterial species, *P. aeruginosa* and  
466 showed that in *P. aeruginosa*, reversal of substrate preference as compared to *E. coli*,  
467 coincides with a complete reversal of the phenomenology of lag phases and tradeoffs  
468 during shifts between different substrates.

469

470 Our model indicates microbes could in principle reduce lag times by tolerating high levels  
471 of futile cycling. We estimate that ATP dissipation from futile cycling can be on the same  
472 order of magnitude as the energy budget of the cell during steady-state growth, but energy  
473 production pathways only constitute a relatively small fraction (around 20%) of the total  
474 cellular proteome (Basan et al., 2015a). Thus, in theory, the cell might be able to  
475 compensate for higher levels of futile cycling with increasing resources devoted to energy  
476 production. However, experimentally it appears that *E. coli* chooses to keep futile cycling  
477 in check, even at the cost of substantially reduced growth rates, as evidenced by the  
478 repression of glycolytic enzymes by the transcription factor Cra resulting in slower growth  
479 (Basan et al., 2020). We hypothesize that futile cycling must be considered not just during  
480 steady-state growth, but during growth shifts and during starvation, where the cellular  
481 energy budget is much more limited. In fact, it has been recently shown that the energy  
482 budget of the cell is around 100-fold smaller during carbon starvation and that energy  
483 dissipation can increase death rates several-fold (Schink et al., 2019). Therefore, even  
484 levels of futile cycling that are modest during steady-state growth should severely affect  
485 survival of cells in these conditions.

486

487 Our findings indicate that lag times and a tradeoff between futile cycling and short lag  
488 times are inherent properties of central carbon metabolism, at least given the existing  
489 allosteric and transcriptional regulation. Why different regulation that can overcome this  
490 limitation has not evolved, at least in the microbes that we tested, is a difficult question. In  
491 principle, one could imagine that the cell could directly detect the presence of  
492 gluconeogenic substrates and the absence of glycolytic substrates, which could trigger the  
493 active degradation of glycolytic enzymes and would allow the cell to overcome lag phases  
494 more quickly. However, since there are dozens of glycolytic and gluconeogenic substrates,

495 this would result in a much higher degree of complexity of the regulation. It may be  
496 difficult for a regulatory network to integrate so many signals, many of which would be  
497 conflicting with each other in any one condition. Typically, the regulatory architecture  
498 found in *E. coli* is of a much simpler in nature (Kochanowski et al., 2013a). The wrong  
499 decision to degrade key metabolic enzymes would have adverse consequences, for example  
500 when glycolytic flux is only briefly interrupted, degrading these enzymes would impair  
501 growth.

502

503 Another reason, why no such regulation has evolved could be related the to the striking  
504 observation that the regulation of upper and lower glycolysis/gluconeogenesis and  
505 directionality of flux are performed by the metabolite concentrations of FBP and PEP,  
506 which are cut off from the rest of metabolism by irreversible reactions. We argue that the  
507 logic for this regulatory architecture is product inhibition, which ensures that this essential  
508 part of central carbon metabolism is adequately supplied with metabolites, but also ensures  
509 that uncontrolled accumulation of metabolites does not occur. In fact, because the reactions  
510 of upper and lower glycolysis are effectively irreversible, even a slight misbalance in flux  
511 between these enzymes and biomass demand would result in uncontrolled accumulation of  
512 metabolites and in the absence of a cellular overflow mechanism, these metabolites would  
513 quickly reach toxic levels, e.g., via their osmotic activities. As demonstrated by the  
514 simulation, the existing regulation of glycolysis/gluconeogenesis successfully solves this  
515 potentially serious problem.

516

517 Our model shows that the known regulatory architecture of glycolysis/gluconeogenesis  
518 accomplishes efficient regulation of fluxes and metabolite pools in response to diverse  
519 external conditions, while avoiding toxic accumulation of internal metabolites and  
520 integrating multiple conflicting signals with only two regulatory nodes. The  
521 glycolysis/gluconeogenesis system is a remarkable example of self-organization of  
522 regulatory networks in biology. It provides an elegant solution to the complex, obligatory  
523 problem, posed by the biochemistry of central carbon metabolism. All organisms that need  
524 to switch between glycolytic and gluconeogenic flux modes face this problem and we argue  
525 that this explains the striking degree of conservation of the phenomenology of shifts



526 between glycolytic and gluconeogenic conditions that we found in different microbial  
527 species, ranging from *E. coli*, *Bacillus subtilis*, and even wild-type strains of the lower  
528 eukaryote *Saccharomyces cerevisiae* to the reversed phenotypes in *P. aeruginosa*.  
529 Conversely, we argue that the quantitative phenotypes exhibited by microbes in such  
530 idealized growth shift experiments in the lab, can reveal much about their natural  
531 environments, ecology and evolutionary origin.

532

### 533 **Acknowledgments**

534 We thank Terence Hwa for many fruitful discussions throughout this project. This project  
535 was financed by MIRA grant (5R35GM137895) via MB and HFSP Long-term fellowship  
536 (LT000597/2018) via SJS.

537

### 538 **Author contributions**

539 All authors contributed to the design of the project and writing the manuscript. SJS, DC  
540 and MB performed modelling. AM and MB performed experiments.

541 **Methods**

542 *Bacterial cultures*

543 Strains used in this paper are wild-type *Escherichia coli* K-12 NCM3722 (Soupene et  
544 al., 2003) and *Pseudomonas aeruginosa* PAO1 (Stover et al., 2000). The culture  
545 medium used in this study is N<sup>-</sup>C<sup>-</sup> minimal medium (Csonka et al., 1994), containing  
546 K<sub>2</sub>SO<sub>4</sub> (1 g), K<sub>2</sub>HPO<sub>4</sub>·3H<sub>2</sub>O (17.7 g), KH<sub>2</sub>PO<sub>4</sub> (4.7 g), MgSO<sub>4</sub>·7H<sub>2</sub>O (0.1 g) and NaCl  
547 (2.5 g) per liter. The medium was supplemented with 20mM NH<sub>4</sub>Cl, as nitrogen  
548 source, and either of the following carbon sources: 20mM Glucose-6-phosphate,  
549 20mM gluconate, 0.2% glucose, 20mM succinate, 20mM acetate, 20mM citrate, 20mM  
550 malate or 20mM fumarate.

551

552 Growth was then carried out at 37° C in a water bath shaker at 200 rpm, in silicate  
553 glass tubes (Fisher Scientific) closed with plastic caps (Kim Kap). Cultures spent at  
554 least 10 doublings in exponential growth in pre-shift medium. For growth shifts,  
555 cultured were transferred to a filter paper and washed twice with pre-warmed post-  
556 shift medium. Cells were resuspended from the filter paper in post-shift medium, and  
557 unsequently diluted to an OD of about 0.05.

558

559 *Theoretical modelling*

560 The integrated minimal model of metabolism and growth was implemented in  
561 MATLAB using the SimBiology toolbox, and is described in detail in the Supporting  
562 Information.

563

564 **References**

- 565 Andrezzi, S., Miskovic, L., and Hatzimanikatis, V. (2016). iSCHRUNK – In Silico  
566 Approach to Characterization and Reduction of Uncertainty in the Kinetic Models of  
567 Genome-scale Metabolic Networks. *Metabolic Engineering* 33, 158–168.
- 568 Basan, M., Hui, S., Okano, H., Zhang, Z., Shen, Y., Williamson, J.R., and Hwa, T.  
569 (2015a). Overflow metabolism in *Escherichia coli* results from efficient proteome  
570 allocation. *Nature* 528.
- 571 Basan, M., Zhu, M., Dai, X., Warren, M., Sévin, D., Wang, Y.-P., and Hwa, T. (2015b).  
572 Inflating bacterial cells by increased protein synthesis. *Mol Syst Biol* 11.
- 573 Basan, M., Hui, S., and Williamson, J.R. (2017). ArcA overexpression induces  
574 fermentation and results in enhanced growth rates of *E. coli*. *Scientific Reports* 7.
- 575 Basan, M., Honda, T., Christodoulou, D., Hörl, M., Chang, Y.-F., Leoncini, E.,  
576 Mukherjee, A., Okano, H., Taylor, B.R., Silverman, J.M., et al. (2020). A universal trade-  
577 off between growth and lag in fluctuating environments. *Nature*.
- 578 Bennett, B.D., Kimball, E.H., Gao, M., Osterhout, R., Van Dien, S.J., and Rabinowitz,  
579 J.D. (2009). Absolute metabolite concentrations and implied enzyme active site  
580 occupancy in *Escherichia coli*. *Nature Chemical Biology* 5, 593–599.
- 581 Berger, S.A., and Evans, P.R. (1991). Steady-state fluorescence of *Escherichia coli*  
582 phosphofructokinase reveals a regulatory role for ATP. *Biochemistry* 30, 8477–8480.
- 583 Berman, K.M., and Cohn, M. (1970). Phosphoenolpyruvate Synthetase of *Escherichia*  
584 *coli*. *Journal of Biological Chemistry* 245, 5309–5318.
- 585 Bordbar, A., Monk, J.M., King, Z.A., and Palsson, B.O. (2014). Constraint-based models  
586 predict metabolic and associated cellular functions. *Nature Reviews Genetics* 15, 107–  
587 120.
- 588 Buescher, J.M., Liebermeister, W., Jules, M., Uhr, M., Muntel, J., Botella, E., Hessling,  
589 B., Kleijn, R.J., Chat, L.L., Lecoite, F., et al. (2012). Global Network Reorganization  
590 During Dynamic Adaptations of *Bacillus subtilis* Metabolism. *Science* 335, 1099–1103.
- 591 Chakrabarti, A., Miskovic, L., Soh, K.C., and Hatzimanikatis, V. (2013). Towards kinetic  
592 modeling of genome-scale metabolic networks without sacrificing stoichiometric,  
593 thermodynamic and physiological constraints. *Biotechnology Journal* 8, 1043–1057.
- 594 Chassagnole, C., Noisommit-Rizzi, N., Schmid, J.W., Mauch, K., and Reuss, M. (2002).  
595 Dynamic modeling of the central carbon metabolism of *Escherichia coli*. *Biotechnology*  
596 *and Bioengineering* 79, 53–73.
- 597 Chubukov, V., Gerosa, L., Kochanowski, K., and Sauer, U. (2014). Coordination of  
598 microbial metabolism. *Nature Reviews Microbiology* 12, 327–340.

- 599 Cortay, J.C., Nègre, D., Scarabel, M., Ramseier, T.M., Vartak, N.B., Reizer, J., Saier,  
600 M.H., and Cozzzone, A.J. (1994). In vitro asymmetric binding of the pleiotropic  
601 regulatory protein, FruR, to the ace operator controlling glyoxylate shunt enzyme  
602 synthesis. *The Journal of Biological Chemistry* 269, 14885–14891.
- 603 Donahue, J.L., Bownas, J.L., Niehaus, W.G., and Larson, T.J. (2000). Purification and  
604 Characterization of glpX-Encoded Fructose 1,6-Bisphosphatase, a New Enzyme of the  
605 Glycerol 3-Phosphate Regulon of Escherichia coli. *Journal of Bacteriology* 182, 5624–  
606 5627.
- 607 Fenton, A.W., and Reinhart, G.D. (2009). Disentangling the web of allosteric  
608 communication in a homotetramer: heterotropic inhibition in phosphofructokinase from  
609 Escherichia coli. *Biochemistry* 48, 12323–12328.
- 610 Folly, B.B., Ortega, A.D., Hubmann, G., Bonsing-Vedelaar, S., Wijma, H.J., Meulen, P.  
611 van der, Miliás-Argeitis, A., and Heinemann, M. (2018). Assessment of the interaction  
612 between the flux-signaling metabolite fructose-1,6-bisphosphate and the bacterial  
613 transcription factors CggR and Cra. *Molecular Microbiology* 109, 278–290.
- 614 Gerosa, L., Haverkorn van Rijsewijk, B.R.B., Christodoulou, D., Kochanowski, K.,  
615 Schmidt, T.S.B., Noor, E., and Sauer, U. (2015a). Pseudo-transition Analysis Identifies  
616 the Key Regulators of Dynamic Metabolic Adaptations from Steady-State Data. *Cell*  
617 *Systems* 1, 270–282.
- 618 Gerosa, L., Haverkorn van Rijsewijk, B.R.B., Christodoulou, D., Kochanowski, K.,  
619 Schmidt, T.S.B., Noor, E., and Sauer, U. (2015b). Pseudo-transition Analysis Identifies  
620 the Key Regulators of Dynamic Metabolic Adaptations from Steady-State Data. *Cell*  
621 *Systems* 1, 270–282.
- 622 Hines, J.K., Fromm, H.J., and Honzatko, R.B. (2006). Novel Allosteric Activation Site in  
623 Escherichia coli Fructose-1,6-bisphosphatase \*.
- 624 Hui, S., Silverman, J.M., Chen, S.S., Erickson, D.W., Basan, M., Hwa, T., and  
625 Williamson, J.R. (2015). Quantitative proteomic analysis reveals a simple strategy of  
626 global resource allocation in bacteria. *Molecular Systems Biology*.
- 627 Johnson, J.L., and Reinhart, G.D. (1997). Failure of a two-state model to describe the  
628 influence of phospho(enol)pyruvate on phosphofructokinase from Escherichia coli.  
629 *Biochemistry* 36, 12814–12822.
- 630 Kelley-Loughnane, N., Biolsi, S.A., Gibson, K.M., Lu, G., Hehir, M.J., Phelan, P., and  
631 Kantrowitz, E.R. (2002). Purification, kinetic studies, and homology model of  
632 Escherichia coli fructose-1,6-bisphosphatase. *Biochimica et Biophysica Acta* 1594, 6–16.
- 633 Kochanowski, K., Volkmer, B., Gerosa, L., Haverkorn van Rijsewijk, B.R., Schmidt, A.,  
634 and Heinemann, M. (2013a). Functioning of a metabolic flux sensor in Escherichia coli.  
635 *Proceedings of the National Academy of Sciences* 110, 1130–1135.

- 636 Kochanowski, K., Volkmer, B., Gerosa, L., Haverkorn van Rijsewijk, B.R., Schmidt, A.,  
637 and Heinemann, M. (2013b). Functioning of a metabolic flux sensor in *Escherichia coli*.  
638 Proceedings of the National Academy of Sciences of the United States of America *110*,  
639 1130–1135.
- 640 Kotte, O., Volkmer, B., Radzikowski, J.L., and Heinemann, M. (2014). Phenotypic  
641 bistability in *Escherichia coli*'s central carbon metabolism. *Molecular Systems Biology*  
642 *10*, 736.
- 643 Link, H., Anselmet, B., and Weuster-Botz, D. (2008). Leakage of adenylates during  
644 cold methanol/glycerol quenching of *Escherichia coli*. *Metabolomics* *4*, 240–247.
- 645 Link, H., Kochanowski, K., and Sauer, U. (2013). Systematic identification of allosteric  
646 protein-metabolite interactions that control enzyme activity in vivo. *Nature*  
647 *Biotechnology* *31*, 357–361.
- 648 Lynch, W.H., and Franklin, M. (1978). Effect of Temperature on Diauxic Growth with  
649 Glucose and Organic Acids in *Pseudomonas fluorescens*.
- 650 Noor, E., Eden, E., Milo, R., and Alon, U. (2010). Central Carbon Metabolism as a  
651 Minimal Biochemical Walk between Precursors for Biomass and Energy. *Molecular Cell*  
652 *39*, 809–820.
- 653 Noor, E., Bar-Even, A., Flamholz, A., Reznik, E., Liebermeister, W., and Milo, R.  
654 (2014). Pathway Thermodynamics Highlights Kinetic Obstacles in Central Metabolism.  
655 *PLOS Computational Biology* *10*, e1003483.
- 656 Otterstedt, K., Larsson, C., Bill, R.M., Ståhlberg, A., Boles, E., Hohmann, S., and  
657 Gustafsson, L. (2004). Switching the mode of metabolism in the yeast *Saccharomyces*  
658 *cerevisiae*. *EMBO Reports* *5*, 532–537.
- 659 Pham, A.S., and Reinhart, G.D. (2001). Pre-steady state quantification of the allosteric  
660 influence of *Escherichia coli* phosphofructokinase. *J Biol Chem* *276*, 34388–34395.
- 661 Ramseier, T.M., Bledig, S., Michotey, V., Feghali, R., and Saier, M.H. (1995). The  
662 global regulatory protein FruR modulates the direction of carbon flow in *Escherichia coli*.  
663 *Molecular Microbiology* *16*, 1157–1169.
- 664 Saa, P., and Nielsen, L.K. (2015). A General Framework for Thermodynamically  
665 Consistent Parameterization and Efficient Sampling of Enzymatic Reactions. *PLOS*  
666 *Computational Biology* *11*, e1004195.
- 667 Schink, S.J., Biselli, E., Ammar, C., and Gerland, U. (2019). Death Rate of *E. coli* during  
668 Starvation Is Set by Maintenance Cost and Biomass Recycling. *Cell Systems* *9*, 64–73.e3.
- 669 Soupene, E., van Heeswijk, W.C., Plumbridge, J., Stewart, V., Bertenthal, D., Lee, H.,  
670 Prasad, G., Paliy, O., Charernnoppakul, P., and Kustu, S. (2003). Physiological Studies of

- 671 Escherichia coli Strain MG1655: Growth Defects and Apparent Cross-Regulation of  
672 Gene Expression. *J Bacteriol* 185, 5611–5626.
- 673 Stincone, A., Prigione, A., Cramer, T., Wamelink, M.M.C., Campbell, K., Cheung, E.,  
674 Olin-Sandoval, V., Grüning, N.-M., Krüger, A., Alam, M.T., et al. (2015). The return of  
675 metabolism: biochemistry and physiology of the pentose phosphate pathway. *Biological*  
676 *Reviews* 90, 927–963.
- 677 Stover, C.K., Pham, X.Q., Erwin, A.L., Mizoguchi, S.D., Warrenner, P., Hickey, M.J.,  
678 Brinkman, F.S.L., Hufnagle, W.O., Kowalik, D.J., Lagrou, M., et al. (2000). Complete  
679 genome sequence of *Pseudomonas aeruginosa* PAO1, an opportunistic pathogen. *Nature*  
680 406, 959–964.
- 681 Valentini, G., Chiarelli, L., Fortini, R., Speranza, M.L., Galizzi, A., and Mattevi, A.  
682 (2000). The allosteric regulation of pyruvate kinase: A site-directed mutagenesis study.  
683 *Journal of Biological Chemistry* 275, 18145–18152.
- 684 Vasilakou, E., Machado, D., Theorell, A., Rocha, I., Nöh, K., Oldiges, M., and Wahl,  
685 S.A. (2016). Current state and challenges for dynamic metabolic modeling. *Current*  
686 *Opinion in Microbiology* 33, 97–104.
- 687 Yang, L., Ebrahim, A., Lloyd, C.J., Saunders, M.A., and Palsson, B.O. (2019).  
688 DynamicME: dynamic simulation and refinement of integrated models of metabolism  
689 and protein expression. *BMC Systems Biology* 13, 2.
- 690 Zampar, G.G., Kümmel, A., Ewald, J., Jol, S., Niebel, B., Picotti, P., Aebersold, R.,  
691 Sauer, U., Zamboni, N., and Heinemann, M. (2013). Temporal system-level organization  
692 of the switch from glycolytic to gluconeogenic operation in yeast. *Molecular Systems*  
693 *Biology* 9, 651.
- 694 Zheng, R.L., and Kemp, R.G. (1995). Phosphofructo-1-kinase: Role of Charge  
695 Neutralization in the Active Site. *Biochemical and Biophysical Research*  
696 *Communications* 214, 765–770.
- 697
