1                   **Substrate specialization in microbes is driven by biochemical**  
2                                   **constraints of dynamic flux sensing**

3                   Severin Josef Schink<sup>1,\*</sup>, Dimitris Christodoulou<sup>1,2,\*</sup>, Avik Mukherjee<sup>1,3</sup>, Edward Athaide<sup>1</sup>, Viktoria  
4                   Brunner<sup>2</sup>, Tobias Fuhrer<sup>2</sup>, Gary Andrew Bradshaw<sup>4</sup>, Uwe Sauer<sup>2,#</sup> and Markus Basan<sup>1,#</sup>

5  
6                   \* Equal contribution

7                   <sup>1</sup> Systems Biology Department, Harvard Medical School, 200 Longwood Ave, Boston, MA 02115, USA

8                   <sup>2</sup> Institute of Molecular Systems Biology, ETH Zurich, Zurich 8093, Switzerland

9                   <sup>3</sup> Applied Mathematics Department, Harvard College, Cambridge, MA 02138, USA

10                  <sup>4</sup> Laboratory of Systems Pharmacology, Harvard Program in Therapeutic Science, Harvard Medical School,  
11                  200 Longwood Ave, Boston, MA 02115, USA

12                  # Correspondence: sauer@imsb.biol.ethz.ch, markus@hms.harvard.edu

13

14                  **Central carbon metabolism is highly conserved across microbial species, but operates**  
15                  **in very different ways depending on the organism and their ecological niche. Here,**  
16                  **we study the dynamic re-organization of central metabolism after switches between**  
17                  **the two major opposing pathway configurations of central carbon metabolism,**  
18                  **glycolysis and gluconeogenesis in different bacteria. We combined growth**  
19                  **dynamics and dynamic changes of intracellular metabolite levels with a coarse-**  
20                  **grained model that integrates fluxes, regulation, protein synthesis and growth and**  
21                  **uncovered fundamental limitations of the regulatory network: after nutrient shifts,**  
22                  **metabolite concentrations collapse to their equilibrium, turning the cell ‘blind’ to**  
23                  **which direction the flux is supposed to flow through the metabolic network. The cell**  
24                  **can partially alleviate this ‘blindness’ by picking a preferred direction of regulation,**  
25                  **at the expense of increasing lag times in the opposite direction. Moreover, decreasing**  
26                  **both lag times simultaneously comes at the cost of reduced growth rate or higher futile**  
27                  **cycling between metabolic enzymes. These three trade-offs can explain why**  
28                  **microorganisms specialize for either glycolytic or gluconeogenic substrates and can**  
29                  **help elucidate the complex growth patterns exhibited by different microbial species.**

## 30 **Introduction**

31 Fast growth and quick physiological adaptation to changing environments are key  
32 determinants of fitness in frequently changing environments that microorganisms  
33 encounter in the wild. But in comparison with steady state exponential growth,  
34 understanding of the physiology of growth transitions has remained largely elusive. For  
35 steady state exponential growth, metabolic models have made substantial progress over the  
36 last two decades, elucidating the flux and regulatory networks that govern the coordination  
37 of microbial metabolism (Bennett et al., 2009; Bordbar et al., 2014; Chubukov et al., 2014;  
38 Gerosa et al., 2015a; Link et al., 2013; Noor et al., 2010, 2014; Vasilakou et al., 2016).  
39 Such metabolic model were successfully expanded to dynamic environments (Zampar et  
40 al., 2013; Chassagnole et al., 2002; Chakrabarti et al., 2013; Saa and Nielsen, 2015;  
41 Andreozzi et al., 2016; Yang et al., 2019) and used to gather vital information about  
42 metabolism, using perturbations (Link et al., 2013), stimulus response experiments  
43 (Chassagnole et al., 2002) or sequential nutrient depletion (Yang et al., 2019) to validate  
44 and improve metabolic models. But, dynamic changes of metabolism like shifts in growth  
45 conditions continue to pose a considerable challenge. Changes in enzyme abundance alone  
46 cannot explain the variation of phenotypes exhibited by individual microbial species, nor  
47 between different species, and it is still unclear what determines how long bacteria need to  
48 adapt upon a change of the environment.

49

50 One example of such a switch happens when microbes deplete their primary nutrient.  
51 *Escherichia coli* preferentially utilizes hexose sugars like glucose that are metabolized via  
52 glycolysis (Gerosa et al., 2015b). To maximize growth on sugars, *E. coli* excretes  
53 substantial ‘overflow’ production of acetate, even in the presence of oxygen (Basan et al.,  
54 2015a, 2017). This naturally leads to bi-phasic growth, where initial utilization of glucose  
55 is followed by a switch to acetate. Similar growth transitions from preferred glycolytic  
56 substrates to alcohols and organic acids ubiquitously occur for microbes in natural  
57 environments (Buescher et al., 2012; Otterstedt et al., 2004; Zampar et al., 2013). Since  
58 these fermentation products are all gluconeogenic, they require a reversal of the flux  
59 direction in the glycolysis pathway, which results in multi-hour lag phases caused by the  
60 depletion of metabolite pools throughout the gluconeogenesis pathway (Basan et al., 2020).

61 Similar long lag times in glycolytic to gluconeogenic shifts were observed for *Bacillus*  
62 *subtilis* and the yeast *Saccharomyces cerevisiae* (Basan et al., 2020). Shifts in the opposite  
63 direction, however, from gluconeogenic substrates to glycolytic ones, occur much more  
64 quickly in *E. coli* and other preferentially hexose fermenting microbes, in some cases even  
65 without detectable lag phases (Basan et al., 2020).

66

67 In our previous work (Basan et al., 2020), we showed how the growth rate dependence of  
68 enzyme expression leads to a universal relation between lag times and preshift growth rates  
69 and found evidence that futile cycling at irreversible metabolic reactions plays an important  
70 role for causing lag times. However, we were unable to answer the most fundamental  
71 questions raised by these observations: Why are microorganisms like *E. coli* or *S.*  
72 *cerevisiae* unable to overcome lag phases by expressing more metabolic enzymes or  
73 allosteric regulations that turn off futile cycling after metabolic shifts? Given the small  
74 number of enzymes involved in these irreversible reactions, their cost in terms of proteome  
75 allocation is likely minimal. Instead, microbes like *E. coli* appear to be intentionally  
76 limiting enzyme expression and decreasing their growth rates on many glycolytic  
77 substrates (Basan et al., 2017). Moreover, why do shifts from glycolytic to gluconeogenic  
78 conditions result in lag times of many hours, while shifts from gluconeogenic to glycolytic  
79 conditions only take minutes? Given the symmetry of central metabolism, one would  
80 expect similar lag phases in the opposite direction. Is this preference for glycolysis a  
81 fundamental property of central metabolism or rather an evolutionary choice of individual  
82 species? At the core of these questions is a gap in understanding of how central carbon  
83 metabolism adjusts itself to nutritional changes.

84

85 Here, we study growth and metabolite dynamics of *E. coli*, *Pseudomonas aeruginosa* and  
86 *Pseudomonas putida* using a kinetic model of central carbon metabolism to overcome this  
87 challenge. Our model coarse-grains central metabolism to a low number of irreversible and  
88 reversible reactions, which allows us to focus on the dynamics of key metabolites and their  
89 regulatory action. The model couples metabolism to enzyme abundance via allosteric  
90 regulation and enzyme expression to the concentration of regulatory metabolites via  
91 transcriptional regulation and flux dependent protein synthesis. Our formulation of

92 metabolism and growth bridges fast metabolic time scales with slow protein synthesis. As  
93 we demonstrate, our model can explain a major reorganization of metabolism in response  
94 to nutrients shifts: the switching of the directionality of metabolic flux between glycolysis  
95 and gluconeogenesis. Dependent on the required directionality of flux in central  
96 metabolism, enzymes catalyzing the required flux direction are expressed and catalytically  
97 active, while enzymes catalyzing the opposite flux are expressed at low levels and their  
98 activities are repressed by allosteric regulation. This self-organization is key for enabling  
99 fast growth and preventing costly futile cycling between metabolic reactions in opposing  
100 directions, which can inhibit flux and deplete ATP in the process.

101

102 Reestablishing this self-organization after growth shifts is limited by biochemical  
103 constraints to sense fluxes and to regulate accordingly. When metabolite levels transiently  
104 collapse, allosteric and transcriptional regulation cannot distinguish between glycolysis  
105 and gluconeogenesis, turning the cell ‘blind’ to the direction of flux. By choosing the  
106 activity of metabolic enzymes at these low metabolite levels to favor one direction, the cell  
107 can enable fast switching at the expense of the other direction. This choice of direction in  
108 the absence of information becomes the ‘default state’ of central metabolism and  
109 determines the substrate preference.

110

111 According to the model, the preferred direction does not need to be glycolysis, and in  
112 principle gluconeogenic specialists with a gluconeogenic ‘default’ state could have evolved,  
113 too. Indeed, we showed that *P. aeruginosa* shows reversed lag time and growth phenotypes  
114 compared to those of *E. coli*, which verified that long lag times to glycolytic substrates are  
115 caused by the same inability to sense flux after nutrient shifts.

116

## 117 **Results**

### 118 *An integrated, self-consistent kinetic model of glycolysis / gluconeogenesis*

119 In a shift between glycolysis and gluconeogenesis, flux in central metabolism needs to be  
120 reversed. To understand what limits the speed of adaptation between those two modes of  
121 flux, we turn to a theoretical model of central metabolism. But because the complexity of  
122 central metabolism with intertwined regulation at different levels prevents tracing

123 quantitative phenotypes to their molecular origins, we sought to focus on the biochemical  
124 pathway topology with its key regulations that differentiate glycolysis and gluconeogenesis  
125 and constructed a minimal model of central metabolism. The model is illustrated in Box 1  
126 and described in detail in the SI. It is based on topology of the biochemical network, the  
127 allosteric and the transcriptional regulation of the key the metabolic proteins of *E. coli*, all  
128 of which have been well characterized (Berger and Evans, 1991; Ramseier et al., 1995;  
129 Johnson and Reinhart, 1997; Pham and Reinhart, 2001; Kelley-Loughnane et al., 2002;  
130 Hines et al., 2006; Fenton and Reinhart, 2009).

131

132 The defining feature of the model is a coarse-graining of the irreversible reactions (one-  
133 directional arrows in ‘orange’ and ‘blue’, Box 1A) in the upper and lower part of central  
134 metabolism into single irreversible reactions (one-directional ‘black’ arrows in Box 1B).  
135 While not irreversible in an absolute sense, so-called irreversible reactions are  
136 thermodynamically favored so much in one direction that they can be effectively  
137 considered as irreversible (Noor et al., 2014). As a result, these irreversible reactions in  
138 central metabolism need to be catalyzed by distinct enzymes that perform distinct reactions  
139 For example, Fructose 6-phosphate (F6P) is converted to Fructose 1-6-bisphosphate (FBP)  
140 by enzyme PfkA using ATP. The opposite direction, FBP to F6P, is performed by a  
141 different enzyme, Fbp, which splits off a phosphate by hydrolysis. Each of the two  
142 reactions follows a free energy gradient and are irreversible. If both enzymes are present  
143 and active then the metabolites will be continuously interconverted between F6P and FBP  
144 and in each interconversion one ATP is hydrolyzed to ADP and phosphate. This is a ‘futile  
145 cycle’. It drains the cell’s ATP resource and prevents flux going through the biochemical  
146 network. Because of this importance of irreversible reactions and futile cycling, we  
147 implement irreversible enzymes (‘bold font, blue/orange’ in Box 1A&B) and their  
148 allosteric regulation (‘green’ and ‘red’ arrows in Box 1B) in the model. To successfully  
149 switch flux directions, the cell needs to express irreversible enzymes in the new direction,  
150 up-regulate their activity and repress enzyme activity in the opposing direction.

151

152

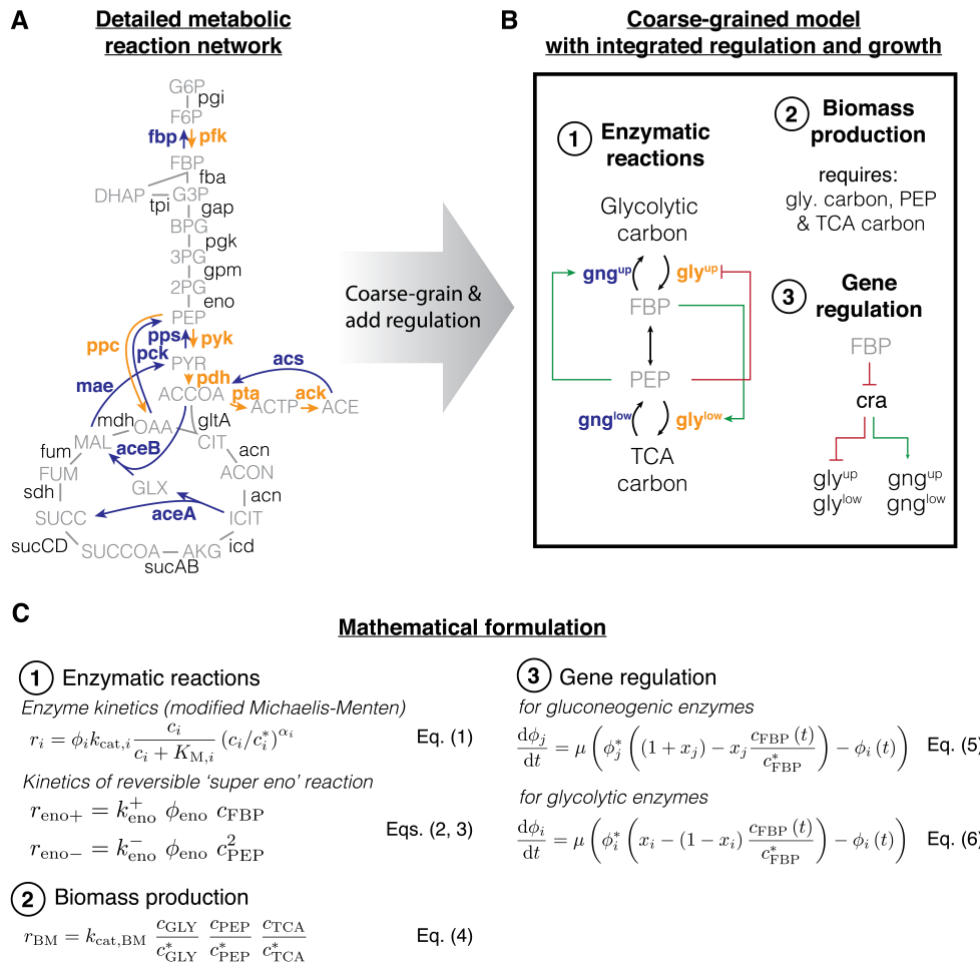

*Box 1 Integrated kinetic model of central carbon metabolism. (A) Detailed metabolic reaction network and (B) minimal network of central carbon metabolism. Coarse-graining was done by combining irreversible glycolytic (orange) and gluconeogenic reactions (blue), as well as metabolites. Influx can either occur from glycolytic carbon sources (e.g. glucose) or tricarboxylic acid (TCA) cycle carbon sources (e.g. acetate). (1) Gatekeepers to the central section of glycolysis and gluconeogenesis are the two irreversible reactions (gly<sup>up</sup>, gng<sup>up</sup> and gly<sup>low</sup>, gng<sup>low</sup>) that feed and drain FBP and PEP. The irreversible reactions are allosterically regulated by FBP (Fructose 1-6-bisphosphate) and PEP (phosphoenolpyruvate), where 'outward' facing reactions are activated (green arrows) and 'inward' facing reactions are repressed (red arrow). (2) Biomass production requires precursors from glycolytic carbons, PEP and TCA cycle carbon. (3) Glycolytic and gluconeogenic enzymes are regulated by Cra, which is in turn modulated by FBP. (C) Mathematical formulation of the model. Numbers correspond to features in panel B. (1) Fluxes  $r_i$  of enzymes  $i$  depend on enzyme abundances  $\phi_i$ , catalytic rates  $k_{cat,i}$  and allosteric regulations, modeled as a Hill function below its maximal saturation  $(c_j/c_j^*)^{\alpha_i}$ , where  $c_j$  is the concentration of the regulatory metabolite and  $c_j^*$  is a reference concentration. Reversible fluxes are modeled with simple mass action kinetics. (2) Biomass production is implemented in the model as single reaction that drains all three metabolites simultaneously at catalytic rate  $k_{cat,BM}$ . (3) Enzyme expression depend linearly on FBP concentration  $c_{FBP}$ . Growth rate:  $\mu$ , steady state abundance:  $\phi_i^*$ , steady state concentration  $c_{FBP}^*$  and  $x_i$  &  $x_j$  modulate the sensitivity of regulation to FBP. Glycolytic and gluconeogenic enzymes are produced as part of protein synthesis. Thus in the model, flux through metabolism automatically leads to synthesis of metabolic enzymes and biomass production, resulting in dilution of existing enzymes.*

153 The metabolites ‘sandwiched’ between the irreversible reactions are coarse-grained into  
154 the first and last metabolites of the series of reversible reactions connecting the irreversible  
155 reactions, FBP and PEP (phosphoenolpyruvate). These metabolites regulate the activity  
156 and expression of the irreversible enzymes (Box 1B and SI Sec. 2).

157

158 In total, the model encompasses four irreversible reactions, each regulated allosterically by  
159 either FBP or PEP, and transcriptionally by FBP via Cra, and one reversible reaction that  
160 connects FBP and PEP. We used measured metabolite concentrations for growth on  
161 glucose (Kochanowski et al., 2013a) and Michaelis constants (Berman and Cohn, 1970;  
162 Zheng and Kemp, 1995; Donahue et al., 2000) to constrain enzymatic parameters and  
163 biomass yield (Link et al., 2008) and density (Basan et al., 2015b) on glucose to constrain  
164 fluxes (SI Sec. 4). We used the level of futile cycling in the upper and lower reactions in  
165 exponential glucose growth, which summarize the effect of enzyme abundance and  
166 allosteric regulation, as fitting parameters such that the model reproduces the observed lag  
167 times in this paper; see SI Sec. 4.2 for details.

168

169 While the model in Box 1 was formulated to coarse-grain glycolysis via the Embden-  
170 Meyerhof-Parnas (EMP) pathway, other glycolytic pathways, such as the Entner-  
171 Doudoroff (ED) pathway, have a similar topology. In ED glycolysis, phosphogluconate  
172 dehydratase (Edd) and KDPG aldolase (Eda) are irreversible reactions that feed into the  
173 chain of reversible reactions, analogous to 6-phosphofructokinase (pfk) in the EMP  
174 pathway. The coarse-grained model thus should capture these alternative pathways too.

175

### 176 *Central carbon metabolism self-organizes in response to substrate availability*

177 To test whether this simple model could recapitulate steady state glycolytic and  
178 gluconeogenic growth conditions, we compared it to published metabolite and proteomics  
179 data of *E. coli*, which is well-characterized in steady state exponential growth on glucose  
180 and acetate as sole carbon substrates (Basan et al., 2020). Indeed, the model reached distinct  
181 steady states for glycolytic and gluconeogenic conditions, which we summarized  
182 graphically with font size indicating enzyme and metabolite abundance and line widths  
183 indicating the magnitude of fluxes (Fig. 1A&B). Active regulation is shown in colored

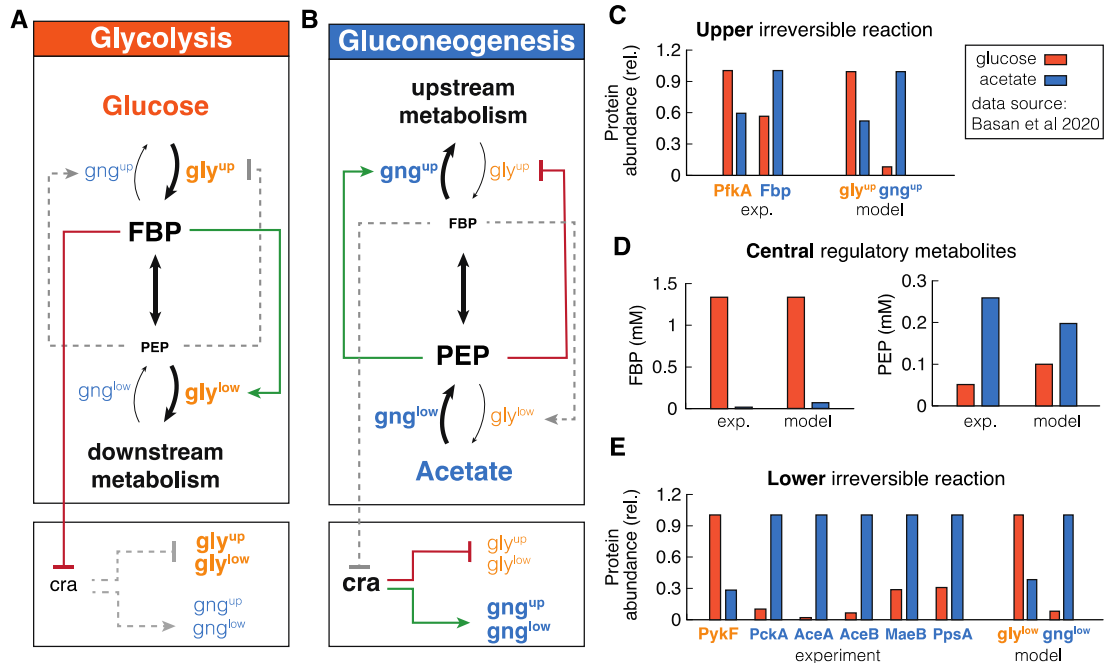

Figure 1 Self-organization of metabolism in glycolysis and gluconeogenesis. (A&B) Graphic summary of the reorganization in glycolysis and gluconeogenesis. Linewidth of reactions arrows indicate magnitude of flux. Font size of metabolites and enzymes indicate metabolite concentrations and enzyme abundances, respectively. Active regulation is indicated by red/green color, inactive regulation is grey and dashed. (C, D&E) Comparison of theoretical and experimental (from (Basan et al., 2020)) metabolite concentrations and enzyme abundances. Note the striking, differential regulation of FBP and PEP, high in one condition and low in the other.

184 lines, while inactive regulation are grey, dashed lines. We quantitatively compare enzyme  
 185 and metabolite abundances to experimental measurements in Fig. 1C-E and find that the  
 186 coarse-grained model can describe the reorganization of metabolism well, despite the  
 187 simplifications of the metabolic and regulatory networks.

188

189 The simulation helps to understand how central metabolism self-organizes in glycolytic  
 190 and gluconeogenic conditions and how allosteric and transcriptional regulation optimize  
 191 fluxes and minimize futile cycling during exponential growth. As shown in Fig. 1C, in  
 192 ‘orange’, during glycolytic conditions, the simulation reached a steady state with high FBP  
 193 levels and low PEP levels. As illustrated in Fig. 1A, the high FBP pool activates lower  
 194 glycolysis, while the low PEP pool derepresses upper glycolysis and deactivates upper  
 195 gluconeogenesis. This suppression of gluconeogenic fluxes in glycolysis reduces futile  
 196 cycling, i.e., circular fluxes at the irreversible reactions, thereby streamlining metabolism.



197 On a transcriptional level, the high FBP pool represses Cra, which in turn derepresses the  
198 expression of glycolytic enzymes and inhibits the expression of gluconeogenic enzymes.  
199 This results in high levels of glycolytic enzymes and low levels of gluconeogenic enzymes  
200 in the simulation (Fig. 1D&E, right panels).

201

202 In gluconeogenic conditions ('blue' in Fig. 1), we find precisely the complementary  
203 configuration of central carbon metabolism. Simulation and experiments show low FBP  
204 and high PEP pools (Fig. 1C). As illustrated in Fig. 1B, high PEP represses upper glycolysis  
205 and activates upper gluconeogenesis, while low FBP deactivates lower glycolysis. Low  
206 FBP also derepresses Cra, which leads to high expression of gluconeogenic enzymes and  
207 low expression of glycolytic enzymes (Fig. 1D, right panels).

208

209 Next we tested if the model could recapitulate how varying growth rates on glycolytic and  
210 gluconeogenic nutrients affects metabolite levels and protein expression in *E. coli* (Gerosa  
211 et al., 2015b; Hui et al., 2015). In particular, it has been shown experimentally that FBP  
212 acts like a flux sensor and FBP concentration linearly increases with glycolytic flux (Fig.  
213 S1A) (Kochanowski et al., 2013b), which is recapitulated by our simulation (Fig. S1D),  
214 under the condition that the speed of the reversible reaction is slow compared to the  
215 irreversible reactions. The linear increase of FBP concentration with growth rate results in  
216 a linear growth rate dependence of gluconeogenic and glycolytic enzyme abundances in  
217 the simulation, in good agreement with experimental measurements of enzyme abundances  
218 from proteomics (Fig. S1 compare B&C with E&F) (Hui et al., 2015). Together, these  
219 results show that integrating the transcriptional and allosteric regulation of FBP and PEP  
220 in the coarse-grained model suffices to describe the major re-configuration of central  
221 metabolism in glycolysis and gluconeogenesis.

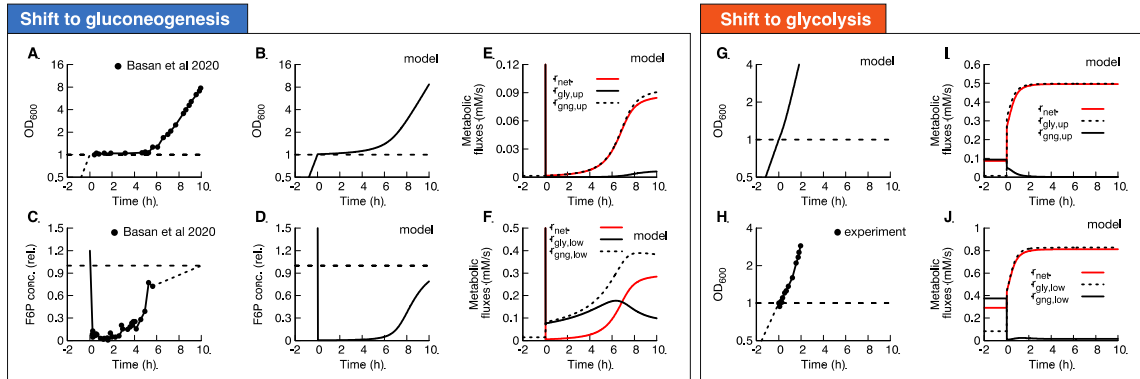

Figure 2 Shifts between glycolysis and gluconeogenesis. (A) Experimental and (B) model of optical density after shift of *E. coli* from glucose to acetate. Growth shows a substantial lag before it recovers. (C) Experimental and (D) model of F6P (normalized to the final state) collapses after shift to acetate, and continues to stay low throughout lag phase. Because F6P is an essential precursor for biomass production, this limitation effectively stops biomass growth. (E&F) Fluxes of all irreversible reactions in units of intracellular concentration per time. Especially fluxes in lower glycolysis/gluconeogenesis are of equal magnitude, leading to a futile cycle, where no net flux (red line) through central carbon metabolism can be established. (G-J) Optical density and metabolic fluxes for the reversed shift from acetate to glucose shows immediate growth and no intermittent futile cycling. The dynamics of all enzyme abundances, regulation and fluxes for both shifts are shown in Fig. S2-6 in detail. The model also correctly predicts that enzyme abundances only adapt late in the lag phase (Fig. S7).

222

223 Central carbon metabolism of *E. coli* is primed for switches to glycolysis

224 Equipped with this model, we next address the mechanistic basis for the extended lag  
 225 phases of *E. coli* upon nutrient shifts from glycolytic to gluconeogenic conditions. When  
 226 shifted from glucose to acetate *E. coli* shows a lag time with almost no growth for around  
 227 5h (Fig. 2A, data: (Basan et al., 2020)). We can reproduce this lag with our model (Fig. 2B,  
 228 Fig. S2-5) when we fit pre-shift futile cycling, which is a measure for enzyme abundances  
 229 and allosteric regulations; see SI Sec. 4.2 for details. All model solutions for *E. coli* shown  
 230 in this paper are generated with the parameters generated from this fit. The model captures  
 231 the slow adaptation of glycolytic and gluconeogenic enzymes, the major change of which  
 232 occurs only towards the end of the lag phase (Fig. S7). Investigating the origin of the  
 233 growth arrest in the simulation, we found that during lag phase, the concentrations of upper  
 234 glycolytic precursors (which includes Fructose 6-phosphate (F6P) and Glucose 6-  
 235 phosphate (G6P)) remained very low compared to their steady state values, which matches  
 236 published experimental evidence of F6P measurements (Basan et al., 2020) (Fig.

237 simulation: 2C, data 2D). This indicates that essential precursors are limited, and thereby,  
238 according to Eq. (4) growth rate during lag phase stalls.

239

240 In the simulation, the F6P limitation is caused by low net fluxes in upper and lower  
241 gluconeogenesis (Fig. 2E&F, red lines). Previously, it was suggested that futile cycling  
242 between gluconeogenic and glycolytic enzymes could contribute to this flux limitation  
243 (Basan et al., 2020), supported by the observation that overexpression of glycolytic  
244 enzymes in upper or lower glycolysis strongly impaired switching and resulted in much  
245 longer lag times (Basan et al., 2020). The simulation allows us to probe the effect of futile  
246 cycling *in silico*, which cannot be directly measured experimentally. Indeed, we found for  
247 our default *E. coli* parameters that residual lower glycolytic flux almost completely  
248 canceled the flux from gluconeogenesis, i.e.,  $r_{\text{gly}}^{\text{low}} \approx r_{\text{gng}}^{\text{low}}$  (solid and dashed black lines in  
249 Fig. 3F), such that net gluconeogenic flux remained close to zero (red line, Fig. 2E&F).  
250 Thus, this futile cycling appears to be the main reason for limiting net flux throughout the  
251 lag phase.

252

253 The biochemical network and regulation are almost completely symmetric with respect to  
254 the direction of flux, so one might naively expect a shift from gluconeogenesis to glycolysis  
255 to also result in a long lag. However, experimentally the shift in the opposite direction from  
256 gluconeogenesis to glycolysis occurs very quickly in *E. coli* (Fig. 2G) (Basan et al., 2020).  
257 Our simulations with the standard *E. coli* parameters can recapitulate that central  
258 metabolism adjusted very quickly and growth resumed without a substantial lag phase (Fig.  
259 2H). In striking contrast to the shift to gluconeogenesis, futile cycling played no role in the  
260 shift to glycolysis, because both upper and lower glycolytic fluxes got repressed  
261 immediately after the shift (Fig. 2I-J, solid black line), such that net flux could build up  
262 (Fig. 2I-J, red line). The absence of transient futile cycling, despite the symmetry of  
263 regulation and metabolic reactions, means that it must be the allosteric and transcriptional  
264 regulations that ‘prime’ central metabolism of *E. coli* for the glycolytic direction.

265

266 *Molecular cause of preferential directionality*

267 To understand the molecular cause of the asymmetric response and lag phases, we  
268 investigated the role of allosteric and transcriptional regulation in our simulation. During  
269 steady state growth, the differential regulation during glycolysis and gluconeogenesis is  
270 achieved by PEP and FBP, the metabolites that are “sandwiched” between the two  
271 irreversible reactions and connected by a series of reversible enzymes, coarse-grained in  
272 our model into the ‘super-eno’ enzyme. First, we focused on regulation during exponential  
273 growth and wanted to investigate how the cell achieves differential regulation of glycolytic  
274 and gluconeogenic enzymes using the metabolites FBP and PEP. In equilibrium, forward  
275 and backward reactions would balance, i.e.,  $r_{\text{ENO}+} = r_{\text{ENO}-}$ , and no net flux could run  
276 through central metabolism, meaning that the cell could not grow. Using Eqs. (2&3), the  
277 balance of forward and backward fluxes results in a fixed quadratic dependence of FBP  
278 and PEP in equilibrium,

$$c_{\text{FBP}}^{\text{eq}} = k_{\text{ENO}-} / k_{\text{ENO}+} (c_{\text{PEP}}^{\text{eq}})^2. \quad (7)$$

279  
280 Close to the equilibrium, FBP and PEP levels go up and down together, rather than the  
281 opposing directions, as observed for glycolytic and gluconeogenic growth (Fig. 1A&B).  
282 This results in low net flux and very slow growth. Hence, for steady state growth, the  
283 equilibrium must be broken and  $\text{FBP} \gg \text{PEP}$  or  $\text{FBP} \ll \text{PEP}$ , such that either glycolytic  
284 flux is bigger than gluconeogenic or vice-versa ( $r_{\text{ENO}+} \gg r_{\text{ENO}-}$  and  $r_{\text{ENO}+} \ll r_{\text{ENO}-}$ ,  
285 respectively). This is achieved by the irreversible reactions, which drain and supply  
286 metabolites to the ‘super-eno’. Because of the positive feedback between enzyme activity  
287 and non-equilibrium of the ‘super-eno’, this regulation topology achieves differential  
288 regulation during glycolysis and gluconeogenesis. As we observed in the analysis of the  
289 glycolytic and gluconeogenic steady states (Fig. 1), this differential regulation adjusts  
290 enzyme levels via transcriptional regulation and suppresses futile cycling at the irreversible  
291 reactions.  
292

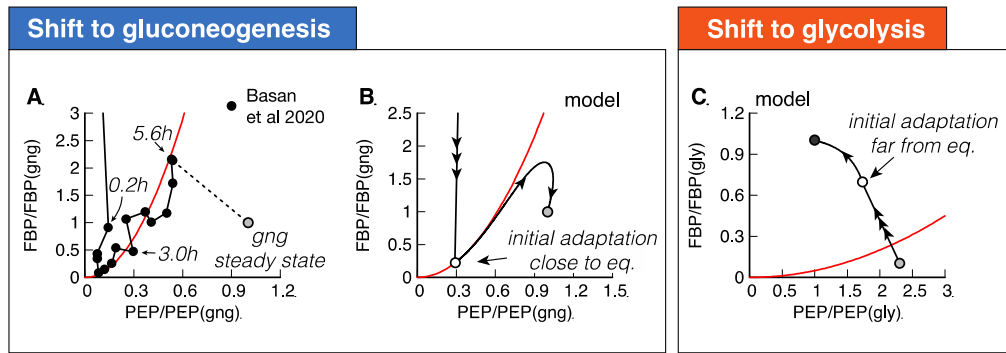

*Figure 3 Molecular cause for asymmetric recovery dynamics in E. coli. (A) Recovery of FBP and PEP of after a shift from glucose to acetate, shows a distinctive joint increase, followed by an overshoot of FBP. Data from Ref. [4]. Red line is a quadratic guide to the eye. Final acetate steady state is drawn as grey symbol and used to normalize both FBP and PEP levels. (B) Model solution of FBP and PEP. After the fast collapse of metabolite levels (triple arrow to white circle), the dynamics closely follows the quadratic FBP-PEP equilibrium Eq. (7). Eventually recovery will diverge away from the equilibrium line, towards the non-equilibrium steady states of gluconeogenesis (grey circle) (C) For a shift to glycolysis, metabolite levels do not collapse, but instead land already far from equilibrium (triple arrow to white circle), such that flux is immediately established, and recovery is quick.*

293 While regulation of central metabolism efficiently organizes FBP-PEP in a far from  
 294 equilibrium state during exponential growth, nutrient shifts expose the limitations of this  
 295 regulatory system. To understand why, we plot FBP against PEP, with both metabolites  
 296 normalized to their gluconeogenic steady state (Fig. 3A). We indicated several time-points  
 297 along the dynamics, and the final steady state is shown with a grey symbol. Initially, both  
 298 FBP and PEP drop close to zero, followed by a very slow joint increase of FBP and PEP  
 299 over the course of hours (Fig. 3A). This joint increase, rather than a differential increase,  
 300 is the hallmark of a close-to-equilibrium state.

301

302 The slow recovery can be understood from the simulation, which shows that FBP and PEP  
 303 proceed close to the equilibrium line of Eq. (7), where growth is slow (Fig. 3B). As a guide  
 304 to the eye, we drew an equilibrium parabola in Fig. 3A along the joint increase, too.

305

306 We previously showed that throughout most of the lag phase, higher gluconeogenic flux  
 307 from increasing levels of gluconeogenic enzymes is almost completely lost to a  
 308 corresponding increase in futile cycling because increasing FBP activates lower glycolysis,  
 309 instead of deactivating it (Fig. 2F). The overshoot of FBP in Fig. 3A (data) and Fig. 3B

310 (model) is what finally allows the cell to establish net flux because it is breaking the  
311 equilibrium: PEP concentration is high enough to activate upper gluconeogenesis  
312 sufficiently to drain FBP via upper gluconeogenesis (see Fig. 2E). Lower FBP then shuts  
313 down futile cycling in lower glycolysis/gluconeogenesis (Fig. 2F), pushing FBP and PEP  
314 concentrations to a state far from the equilibrium line (see Fig. 3B) and allowing the cell  
315 to grow at a faster rate.

316

317 The fundamental difference between shifts to gluconeogenesis and glycolysis in *E. coli* is  
318 that glycolytic shifts immediately land far from equilibrium (Fig. 3C, triple arrow to white  
319 circle), such that cells immediately grow at faster rates, allowing them to express the new  
320 enzymes needed to recover quickly. But why does one direction immediately land far from  
321 equilibrium, while the other lands close to equilibrium?

322

323 *Three trade-offs constrain lag times to glycolysis and gluconeogenesis*

324 The out-of-equilibrium state is caused by net flux going through metabolism. Therefore,  
325 we investigated what causes fluxes not to flow in a uniform direction after shifts to  
326 glycolysis and gluconeogenesis. In principle, metabolite flux brought to the ‘super-eno’  
327 can exit via two drains: upper gluconeogenesis, activated by PEP, and lower glycolysis,  
328 activated by FBP (Fig. 4A). How much flux exits via either drain depends on the current  
329 protein abundances and the allosteric regulation. If the allosteric regulation and protein  
330 abundances favor the lower drain, then after a switch to glycolysis, FBP builds up, PEP is  
331 drained and a net flux is immediately accomplished. In a shift to gluconeogenesis, however,  
332 flux that enters central metabolism from the TCA cycle will immediately drain back to the  
333 TCA cycle, leading to an in-and-out flux but no net flux. In this situation, FBP and PEP  
334 stay in equilibrium and the recovery stalls. If on the other hand, the upper drain was favored  
335 over the lower drain, then we would expect the behavior to be reversed and gluconeogenic  
336 flux would be immediately accomplished, while the glycolytic recovery would stall.

337

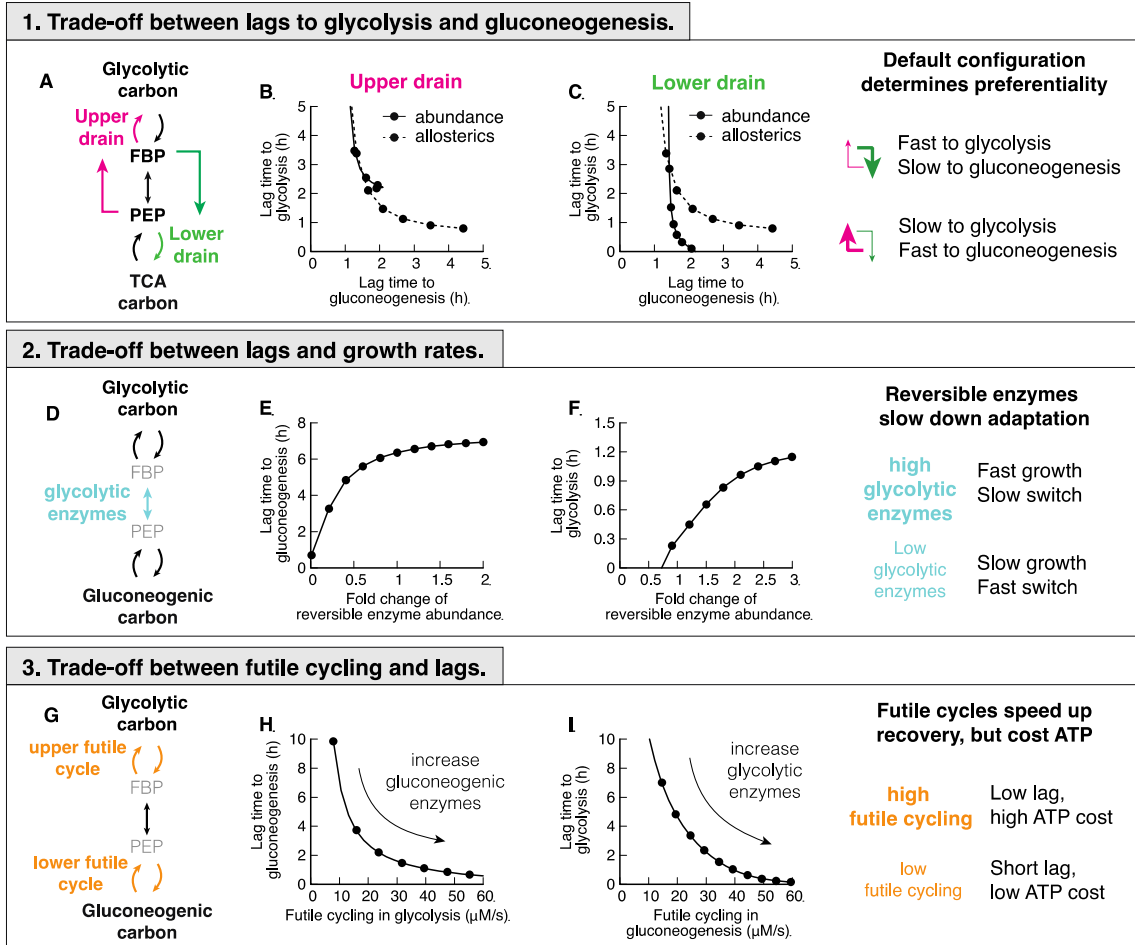

**Figure 4** Trade-offs between glycolysis and gluconeogenesis. (A) Two drains in central metabolism deplete central metabolites. (B-C) Changing abundance  $\phi$  or allosteric regulation strength  $\alpha$  in either lower or upper drain leads to a shift of lag times, decreasing lags in one direction at the cost of the other. Choosing strength of the drains such that either top or bottom is stronger, will lead to a fast recovery in one direction, and a slow in the other. (D) Reversible enzymes in the central metabolism (coarse-grained here into ‘super-eno’). Abundance of reversible enzymes scale linearly with growth rate [16]. (E-F) Decreasing abundance of reversible enzymes decreases lag times. This effect is due to regulatory metabolites being in a far-from-equilibrium state when abundances are low, which allows differential regulation via FBP and PEP. For high abundance, regulation is weak and lag times long. (G) There are two futile cycles in central metabolism. (H-I) Increasing abundance of enzymes of the opposing direction in pre-shift, e.g. gluconeogenic enzymes in glycolytic growth, increases futile cycling and decreases lag times. Because in futile cycles free energy is dissipated, usually in the form of ATP hydrolysis, futile cycling has an energetic cost.

338 In the simulation, we are able to test the hypothesis that the upper and lower drains  
 339 determines the preferential directionality of the central metabolism by varying enzyme  
 340 abundances and the strength of allosteric interactions in upper and lower drains *in silico*.  
 341 We let metabolism adapt to gluconeogenic and glycolytic conditions and calculate lag

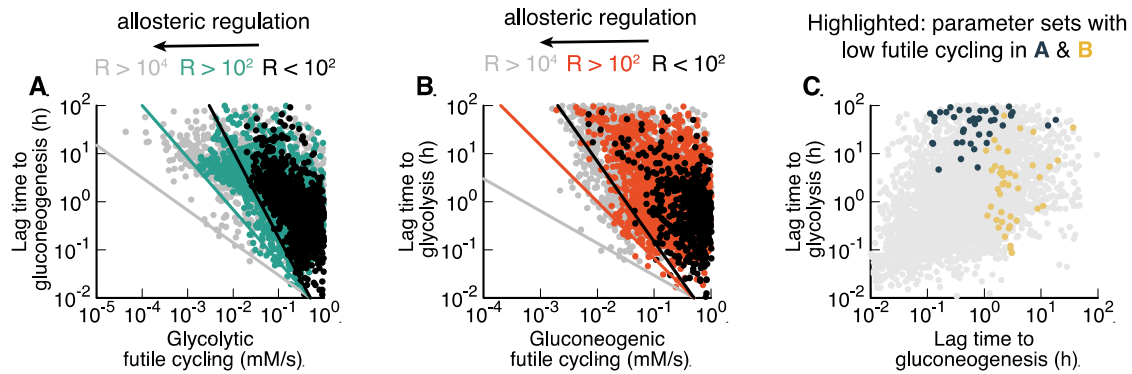

Figure 5 Large-scale parameter scan reveals Pareto optimality between lag times and futile cycling. (A-B) Model calculated for randomized sets of protein abundancies, reaction rates, Michaelis constants, allosteric interactions, transcriptional regulation, see SI. Each point corresponds to a parameter set that allows exponential growth on both glycolytic and gluconeogenic carbons, as well switching between both conditions. Data is colored according to the total regulation  $R$ , i.e., the sum of fold-changes of enzyme activities between glycolysis and gluconeogenesis,  $(c_i^{gly}/c_i^{gnb})^{\alpha_i}$ , where  $c_i^{gly}$  and  $c_i^{gnb}$  are protein abundancies in glycolysis and gluconeogenesis of protein  $i$  and  $\alpha_i$  the strength of the allosteric regulation. For standard *E. coli* parameters  $R = 23$ .  $R > 10^4$  are likely unphysiological. Lines indicate Pareto front and are drawn by hand. (C) Parameter sets from panels A&B with low futile cycling highlighted over the background of all parameter sets (grey).

342 times (Fig. 4B&C). Indeed, we found that a decrease of lag time in one direction led to an  
 343 increase of lag time in the opposite direction.

344

345 Varying the outflow from metabolism is not the only determinant of lag times. The set of  
 346 reversible enzymes, coarse-grained in our model into the ‘super-eno’, plays another key  
 347 role because it interconverts the regulatory metabolites FBP and PEP (Fig. 4D). If this  
 348 conversion is fast, the concentrations of FBP and PEP will be close to their equilibrium  
 349 relation in Eq. (7), and differential regulation will be impossible. As a result, lag times in  
 350 both directions increase if we increase the abundance of reversible reactions (Fig. 4E-F).  
 351 This is a counter-intuitive result, as one would have naïvely expected more enzymes to  
 352 speed up reactions. But instead, in metabolism more enzymes will collapse the differential  
 353 regulation and slow down adaptation rates. This trade-off is unavoidable for fast growing  
 354 cells because the cell needs a sufficient amount of reversible glycolytic enzymes to catalyze  
 355 metabolic flux.

356



357 Finally, lag times depend on the amount of futile cycling, i.e., the circular conversion of  
358 metabolites in the upper and lower irreversible reactions (Fig. 4G). Increasing the  
359 abundance of gluconeogenic enzymes in glycolytic growth or glycolytic enzymes in  
360 gluconeogenic growth increases futile cycling but decreases lag times (Fig. 4I&H).  
361 Because futile cycling dissipates ATP, which is not explicitly built into our model, this  
362 third trade-off means that organisms can decrease their switching times by sacrificing  
363 energetic efficiency.

364

365 Are these three trade-offs a fundamental consequence of the regulatory structure or are  
366 there parameter combinations that avoid the trade-offs by simultaneously enabling rapid  
367 growth and rapid switching without costly futile cycling? To answer this question we  
368 performed an extensive scan of model parameters by randomly choosing sets of  
369 biochemical parameters and simulating the resulting model. Of those parameter sets we  
370 chose those that allowed steady state growth in both glycolytic and gluconeogenic  
371 conditions and were able to switch between both states. We plotted the sum of futile cycling  
372 in the upper and lower irreversible reactions in the pre-shift conditions against the  
373 subsequent lag times for shifts to gluconeogenesis (Fig. 6A) and to glycolysis (Fig. 6B). In  
374 addition, we colored individual parameter sets according to the total allosteric regulation,  
375 defined as the sum of fold-changes of enzyme activities between glycolysis and  
376 gluconeogenesis (black:  $R < 10^2$ , red/green:  $10^4 > R > 10^2$ , grey:  $R > 10^4$ ). These fold  
377 changes are the result of both allosteric and transcriptional variations. We found that  
378 metabolism in the majority of randomly generated models is inefficient and dominated by  
379 futile cycling; only a minority of models were able to reduce futile cycling in glycolysis  
380 and gluconeogenesis. Remarkably, despite probing variations of all possible model  
381 parameters, including Michaelis Menten parameters of enzymes and the strengths of  
382 allosteric and transcriptional regulation, lag times could not be reduced at-will by the cell.  
383 Instead, individual parameter sets with similar allosteric regulation (colors) are bound by a  
384 ‘Pareto frontier’ (solid lines) between futile cycling in preshift conditions and lag times.  
385 Points close to the ‘Pareto frontier’ are Pareto-optimal, meaning that any further decrease  
386 of either parameter must come at the expense of the other. Overall, stronger allosteric  
387 regulation shifted the Pareto frontier but was not able to overcome it. Parameter

388 combinations that led to low futile cycling in either glycolysis or gluconeogenesis showed  
389 long lag times in at least one condition (Fig. 5C, ‘black’ and ‘yellow’) compared to the  
390 background of all simulated parameter sets (‘grey’). Thus, from this analysis, it seems that  
391 organisms with the regulatory architecture of Box 1 cannot overcome long lag times  
392 without paying a futile cycling cost during steady state growth.

393

394 *Gluconeogenesis specialists are constrained by the same trade-offs*

395 Taken together, the results of Fig. 4&5 suggest that microbial cells cannot achieve fast  
396 growth, low futile cycling and fast adaptation simultaneously in both glycolysis and  
397 gluconeogenesis. Instead, trade-offs between these six extremes constrain the evolutionary  
398 optimization of microbial metabolism, such that any optimal solution is on a surface of a  
399 multidimensional Pareto frontier, where any improvement in one phenotype will come at  
400 the expense of others. To test this hypothesis, we next asked whether a gluconeogenic  
401 specialist would indeed be constrained by the same trade-offs as *E. coli* and other glycolytic  
402 specialists. For this purpose we chose *P. aeruginosa*, a well-studied gluconeogenesis  
403 specialist that has a similar maximal growth rate in minimal medium as *E. coli* (*E. coli*  
404 0.9/h on glucose, *P.aeruginosa* 1.0/h on malate) and grows on a wide variety of substrates.

405

406 Strikingly, *P. aeruginosa* grows fast on gluconeogenic substrates that are considered ‘poor’  
407 substrates for *E. coli*, but slow on glycolytic substrates that are considered ‘good’ (Fig. 6A).  
408 From our model, we would expect that such a specialization for gluconeogenic substrates  
409 would go along with a reversal in lag phases, too. Indeed, switching between glycolytic  
410 and gluconeogenic substrates, *P. aeruginosa* exhibits a mirrored pattern of lag phases  
411 compared to *E. coli* (compare Fig. 6B to 6C), with a long multi-hour lag phase when  
412 switched to glycolysis.

413

414 To investigate if both *E. coli* and *P. aeruginosa* are constrained by the same trade-offs, we  
415 investigated the effect of pre-shift growth rate, which according to Fig. 4 should have a  
416 negative effect on growth rates. For *E. coli* it is known that shifts from glycolysis to  
417 gluconeogenesis depend on the pre-shift growth rate (Fig. 6D, data: (Basan et al., 2020)),  
418 which we can capture in our model if we take FBP-dependent transcriptional regulation

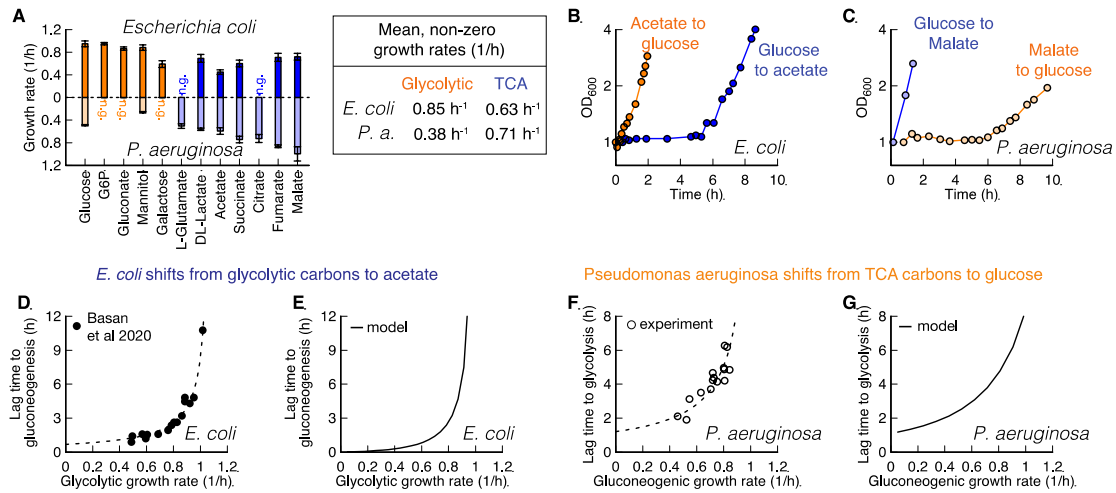

**Figure 6 Comparison of *E. coli* and *P. aeruginosa* during growth and shifts. (A) Growth rates on glycolytic carbons (orange) are faster for *E. coli* than on gluconeogenic carbons (blue). For *Pseudomonas*, this dependence is reversed. No growth indicated with “n.g.”. (B-C) Shifts for *E. coli* and *P. aeruginosa* between glycolytic and gluconeogenic carbon substrates. The preferential order of *P. aeruginosa* is reversed in comparison to *E. coli* (D) *E. coli* shows an increase of lag times to gluconeogenesis with increasing pre-shift growth rate. Lag times diverge around growth rate 1.1/h. (E) The model predicts diverging growth rates without further fitting, based on the growth rate dependent expression levels of glycolytic and gluconeogenic enzymes (Fig. 2E-F). (F) *P. aeruginosa* shows a strikingly similar growth rate to lag time dependence as *E. coli*, when switched to glycolysis, with lag times diverging around 1.0/h. (G) The model can recapitulate observed *P. aeruginosa* lag times if pre-shift glycolytic enzymes are decreased as a function of pre-shift growth rate.**

419 into account (Fig. 6E). We tested the corresponding lag times for *P. aeruginosa* by varying  
 420 gluconeogenic substrates and found a similar dependency in shifts to glycolytic substrates  
 421 (Fig. 6F&G). Hence as expected from the model, these findings show that *P. aeruginosa*  
 422 is constrained by the same trade-offs as *E. coli*.

423

424 To decipher whether *P. aeruginosa* lag times are constrained on a molecular level by the  
 425 same inability to break the equilibrium after nutrient shifts, we investigated metabolite  
 426 concentration dynamics in central metabolism. Because *P. aeruginosa* uses the ED  
 427 pathway for hexose catabolism (Wang et al., 1959; Vicente and Cánovas, 1973), we needed  
 428 to adapt our model slightly. The irreversible reactions in the ED pathway convert  
 429 gluconate-6-phosphate to glyceraldehyde 3-phosphate (GAP) and pyruvate. In the  
 430 reversible chain of reactions, the first metabolite in glycolysis is thus GAP rather than FBP.

*Pseudomonas aeruginosa*

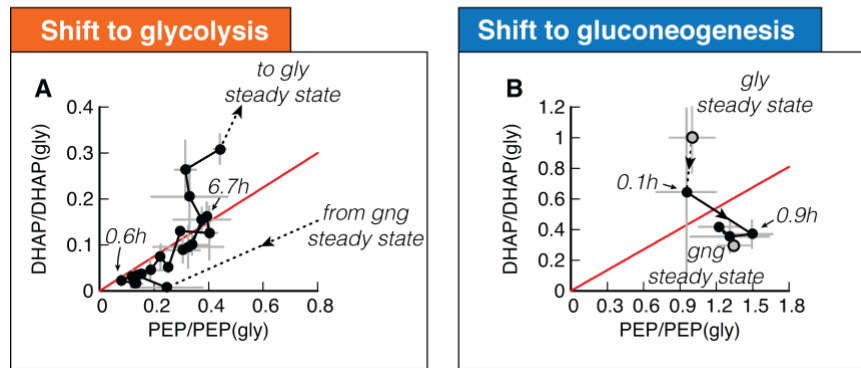

Figure 7 Metabolite dynamics of *P. aeruginosa* during shifts from malate to glucose and vice-versa. (A) DHAP and PEP during shift from malate ('gng') to glucose ('gly'), normalized to the final glycolytic steady state. Recovery follows a direct proportionality, indicating that central metabolism is close to equilibrium (red line) during the recovery. (B) DHAP and PEP reach the final steady state ('gng') without creeping along the equilibrium line.

431 Because GAP is difficult to quantify in mass spec-based metabolomics, we used the closely  
 432 related compound dihydroxyacetone phosphate (DHAP) as a proxy. DHAP is in chemical  
 433 equilibrium with GAP via a single fast and reversible isomerase (Nikel et al., 2015).

434

435 Analogous to Fig. 3, we plot the dynamics of DHAP versus PEP, normalized to their  
 436 glycolytic steady state values, for both shifts (Fig. 7A&B). The dynamics starts and ends  
 437 at their respective steady states (grey symbols and dashed lines) and follows the direction  
 438 of the indicated arrow. In the chemical equilibrium, DHAP depends linearly on PEP,

439  $c_{\text{DHAP}}^{\text{eq}} = k_{\text{ENO-}}/k_{\text{ENO+}} c_{\text{PEP}}^{\text{eq}}$ , analogous to Eq. (7), but without the square because of the

440 1-to-1 stoichiometry between DHAP and PEP. This equilibrium is indicated with a red line.

441 During the long lag time of *P. aeruginosa* in a shift from malate to glucose, we see that

442 initially both DHAP and PEP collapse, followed by a slow increase along the equilibrium

443 line (Fig. 7A). Thus, despite substantial amounts of metabolites being built-up, 'super-eno'

444 remains close to equilibrium. Only after 5.6 h, when the DHAP-PEP dynamics deviates

445 from the line, the equilibrium is broken and net flux can be achieved.

446

447 In the reverse shift from glucose to malate, *P. aeruginosa*, in contrast, can immediately

448 establish a non-equilibrium and grow. Thus not only is the asymmetry in lag times reversed

449 compared to *E. coli*, it is also caused by the same inability to break the equilibrium and  
450 establish net flux in central metabolism.

451

452 But, microbes do not have to be optimized for either direction. One such case is *P. putida*  
453 with moderate lag times of about 1 to 2 h in both directions and only a slight preference for  
454 gluconeogenic substrates (Fig. S8). According to the model, such a generalist strategy can  
455 also be a Pareto-optimal solution of the biochemical trade-offs of Fig. 4-5, but it must come  
456 at the expense of no fast recovery (Fig. 4A-C) and reduced growth because of the trade-  
457 offs with reversible enzymes (Fig. 4D-F) and futile cycling (Fig. 4G-I). This is indeed the  
458 case for *P. putida*. Lag times in the fast direction are twice as long compared to *P.*  
459 *aeruginosa* and the growth rate is about 20% slower (Fig. S8).

460

## 461 **Discussion**

462 In this work, we presented a coarse-grained kinetic model of central carbon metabolism,  
463 combining key allosteric and transcriptional regulation, as well as biomass production,  
464 enzyme synthesis, and growth. This model elucidates the remarkable capacity of central  
465 carbon metabolism to self-organize in response to substrate availability and flux  
466 requirements. During exponential growth, regulatory metabolites adjust to far-from-  
467 equilibrium steady states, providing the cell with an elegant mechanism to sense the required  
468 directionality of the flux. But the model reveals a key limitation of this flux sensing. Because  
469 after a nutrient shift the concentration of the metabolites collapses to its equilibrium, the  
470 cell becomes ‘blind’ to the direction that the flux is supposed to flow through the system.  
471 By implementing a preferred direction, the cell can partially overcome lag times in one  
472 direction at the cost of increasing lag times in the opposite direction. In addition, two more  
473 trade-offs constrain the ability to simultaneously decrease both lag times, because it  
474 impacts growth rate and the level of futile cycling during growth.

475

476 Microbial species can maximize their proliferation only up to the Pareto-frontier spanned  
477 by these trade-offs, which can lead to evolution of substrate specialization. We validated  
478 this key model prediction in different bacterial species. In *P. aeruginosa* we showed a  
479 reversal of substrate preference as compared to *E. coli*, which coincided with a complete

480 reversal of the phenomenology of lag phases and metabolite dynamics. In *P. putida* we  
481 found a generalist strategy with moderate lag times in both direction.

482

483 One of the results from our model is that lag times could be substantially reduced by  
484 allowing futile cycling, e.g., by expressing irreversible enzymes for both directions at all  
485 times. The energetic cost of such a wasteful strategy would be relatively low. Because  
486 energy production pathways only constitute a relatively small fraction (around 20%) of the  
487 total cellular proteome, the cell could compensate ATP dissipated in futile cycling by  
488 increasing ATP production at a relatively low proteome cost. However, experimentally it  
489 appears that *E. coli* chooses to keep futile cycling in check by transcriptionally regulating  
490 irreversible enzymes. We thus hypothesize that the cost of futile cycling must be  
491 considered in conditions where the energy budget is much more limited, such as growth  
492 shifts and during starvation. In fact, it has been recently shown that the energy budget of  
493 the cell is around 100-fold smaller during carbon starvation and that energy dissipation can  
494 increase death rates several-fold (Schink et al., 2019). Therefore, even levels of futile  
495 cycling that are modest during steady state growth should severely affect survival of cells  
496 in these conditions

497

498 Our findings indicate that the identified trade-offs are inherent properties of central carbon  
499 metabolism, at least given the existing allosteric and transcriptional regulation. But could  
500 different regulation overcome this limitation? In principle, the cell could use a direct input  
501 signal from the carbon substrate to allosterically inhibit or even degrade undesired  
502 metabolic enzymes. This would uncouple enzyme abundances and activities in pre- and post-  
503 shift growth and circumvent the trade-offs. But with dozens of glycolytic and  
504 gluconeogenic substrates, this would result in a much higher degree of regulatory  
505 complexity, quickly exceeding the regulatory signal capacity that microbes with their small  
506 genomes could sense and integrate. In addition, any wrong decision to degrade or inhibit  
507 metabolic enzymes, for example when combinations of nutrients are present or when  
508 supply is only briefly inhibited, would drastically impair growth. Thus the regulatory  
509 network that microbes use might not be maximizing growth, but at least it is robust and  
510 prevents misregulation.

511

512 Another reason why no such regulation has evolved could be related to the observation that  
513 the regulation of upper and lower glycolysis/gluconeogenesis and directionality of flux are  
514 performed by the metabolite concentrations of FBP and PEP, which are cut off from the  
515 rest of metabolism by irreversible reactions. We propose that the logic for this regulatory  
516 architecture is product inhibition, which ensures that this essential part of central carbon  
517 metabolism is adequately supplied with metabolites, but also ensures that uncontrolled and  
518 potentially toxic accumulation of metabolites does not occur. In fact, because the reactions  
519 of upper and lower glycolysis are effectively irreversible, even a slight misbalance in flux  
520 between these enzymes and biomass demand would result in uncontrolled accumulation of  
521 metabolites and, in the absence of a cellular overflow mechanism, these metabolites would  
522 quickly reach toxic concentrations, e.g., via their osmotic activities. As demonstrated by  
523 the simulation, the existing regulation of central metabolism successfully resolves this  
524 problem.

525

526 The regulatory architecture of central metabolism accomplishes efficient regulation of  
527 fluxes and metabolite pools in response to diverse external conditions while avoiding toxic  
528 accumulation of internal metabolites and integrating multiple conflicting signals with only  
529 two regulatory nodes. Central metabolism is a remarkable example of self-organization of  
530 regulatory networks in biology. It provides an elegant solution to the complex, obligatory  
531 problem, posed by the biochemistry of central carbon metabolism. All organisms that need  
532 to switch between glycolytic and gluconeogenic flux modes face this problem, and we  
533 argue that this explains the striking degree of conservation of the phenomenology of shifts  
534 between glycolytic and gluconeogenic conditions that we found in different microbial  
535 species, ranging from *E. coli*, *B. subtilis*, and even wild-type strains of the lower eukaryote  
536 *S. cerevisiae* to the reversed phenotypes in *P. aeruginosa*. Conversely, we argue that the  
537 quantitative phenotypes exhibited by microbes in such idealized growth shift experiments  
538 in the lab can reveal much about their natural environments, ecology and evolutionary  
539 origin.

540

541 **Acknowledgments**

542 We thank Terence Hwa for many helpful discussions and always pointing out unresolved  
543 questions in microbial physiology. We thank Mark Polk for proofreading the manuscript.  
544 This project was financed by MIRA grant (5R35GM137895) via MB and HFSP Long-  
545 term fellowship (LT000597/2018) via SJS.

546

547 **Author contributions**

548 SJS, DC, AM, TF, US and MB contributed to the design of the project and writing the  
549 manuscript. SJS, DC and MB performed modelling. AM and MB performed growth  
550 experiments. VB, TF and GAB performed metabolomics measurements.



## 551 **Methods**

### 552 *Bacterial cultures*

553 Strains used in this paper are wild-type *Escherichia coli* K-12 NCM3722 (Soupene et  
554 al., 2003), *Pseudomonas aeruginosa* PAO1 (Stover et al., 2000) and *Pseudomonas*  
555 *putida* NIST0129. The culture medium used in this study is N<sup>-</sup>C<sup>-</sup> minimal medium  
556 (Csonka et al., 1994), containing K<sub>2</sub>SO<sub>4</sub> (1 g), K<sub>2</sub>HPO<sub>4</sub>·3H<sub>2</sub>O (17.7 g), KH<sub>2</sub>PO<sub>4</sub> (4.7  
557 g), MgSO<sub>4</sub>·7H<sub>2</sub>O (0.1 g) and NaCl (2.5 g) per liter. The medium was supplemented  
558 with 20 mM NH<sub>4</sub>Cl, as the nitrogen source, and either of the following carbon sources:  
559 20 mM Glucose-6-phosphate, 20 mM gluconate, 0.2 % glucose, 20 mM succinate, 20  
560 mM acetate, 20 mM citrate, 20 mM malate or 20 mM fumarate.

561

562 Growth was then carried out at 37 °C in a water bath shaker at 200 rpm, in silicate  
563 glass tubes (Fisher Scientific) closed with plastic caps (Kim Kap). Cultures spent at  
564 least 10 doublings in exponential growth in pre-shift medium. For growth shifts,  
565 cultured were transferred to a filter paper and washed twice with pre-warmed post-  
566 shift medium. Cells were resuspended from the filter paper in post-shift medium and  
567 subsequently diluted to an OD of about 0.05.

568

### 569 *Preparation of metabolite samples*

570 Each metabolite sample was filtered, and the filter was immediately plunged in 4 ml  
571 ice cold Methanol (40 %)+Acetonitrile (40 %)+water (20 %) and kept in 50 ml tube.  
572 Bacteria were washed off from the filter by pipetting, and the solution was  
573 transferred to 15 ml tube. Original 50 ml tube was further washed with 4 ml of ice

574 cold Methanol+Acetonitrile+Water mix and added to respective 15 ml tube (total 8  
575 ml). Each sample was dried by speed vac, and dried extracts were sent for Mass spec  
576 analysis.

577

#### 578 *Quantification of intracellular metabolite levels*

579 The dried metabolite extracts were resuspended in 150  $\mu$ L MilliQ water, centrifuged  
580 at 4 °C, 10,000 rpm for 10 min, and 100  $\mu$ L precipitate-free supernatant was  
581 transferred to a master 96-well plate. 25  $\mu$ L of the master plate were transferred to a  
582 96-well plate for acquisition, of which 10  $\mu$ L were injected into a Waters Acquity  
583 ultraperformance liquid chromatography (UPLC) system (Waters) with a Waters  
584 Acquity T3 column coupled to a Thermo TSQ Quantum Ultra triple quadrupole  
585 instrument (Thermo Fisher Scientific) as described previously (Buescher et al., 2010).  
586 Compound separation was achieved using a gradient of two mobile phases: A, 10 mM  
587 tributylamine (ion-pairing agent), 15 mM acetate and 5% (v/v) methanol in water;  
588 and B, 2-propanol. Data was acquired in negative ionization mode using previously  
589 published MRM settings (Buescher et al., 2010). Peak integration was performed  
590 using an in-house software based on MatLab. A dilution series of standards was used  
591 to calculate the concentrations of metabolites in the samples. The final intracellular  
592 concentration was calculated from the sample concentration and the extracted  
593 intracellular volume.

594

#### 595 *Theoretical modelling*

596 The integrated minimal model of metabolism and growth was implemented in  
597 MATLAB using the SimBiology toolbox and is described in detail in the Supporting  
598 Information.  
599

## 600 **References**

- 601 Andreozzi, S., Miskovic, L., and Hatzimanikatis, V. (2016). iSCHRUNK – In Silico  
602 Approach to Characterization and Reduction of Uncertainty in the Kinetic Models of  
603 Genome-scale Metabolic Networks. *Metabolic Engineering* 33, 158–168.
- 604 Basan, M., Hui, S., Okano, H., Zhang, Z., Shen, Y., Williamson, J.R., and Hwa, T.  
605 (2015a). Overflow metabolism in *Escherichia coli* results from efficient proteome  
606 allocation. *Nature* 528.
- 607 Basan, M., Zhu, M., Dai, X., Warren, M., Sévin, D., Wang, Y.-P., and Hwa, T. (2015b).  
608 Inflating bacterial cells by increased protein synthesis. *Mol Syst Biol* 11.
- 609 Basan, M., Hui, S., and Williamson, J.R. (2017). ArcA overexpression induces  
610 fermentation and results in enhanced growth rates of *E. coli*. *Scientific Reports* 7.
- 611 Basan, M., Honda, T., Christodoulou, D., Hörl, M., Chang, Y.-F., Leoncini, E.,  
612 Mukherjee, A., Okano, H., Taylor, B.R., Silverman, J.M., et al. (2020). A universal trade-  
613 off between growth and lag in fluctuating environments. *Nature*.
- 614 Bennett, B.D., Kimball, E.H., Gao, M., Osterhout, R., Van Dien, S.J., and Rabinowitz,  
615 J.D. (2009). Absolute metabolite concentrations and implied enzyme active site  
616 occupancy in *Escherichia coli*. *Nature Chemical Biology* 5, 593–599.
- 617 Berger, S.A., and Evans, P.R. (1991). Steady state fluorescence of *Escherichia coli*  
618 phosphofructokinase reveals a regulatory role for ATP. *Biochemistry* 30, 8477–8480.
- 619 Berman, K.M., and Cohn, M. (1970). Phosphoenolpyruvate Synthetase of *Escherichia*  
620 *coli*. *Journal of Biological Chemistry* 245, 5309–5318.
- 621 Bordbar, A., Monk, J.M., King, Z.A., and Palsson, B.O. (2014). Constraint-based models  
622 predict metabolic and associated cellular functions. *Nature Reviews Genetics* 15, 107–  
623 120.
- 624 Buescher, J.M., Moco, S., Sauer, U., and Zamboni, N. (2010). Ultrahigh Performance  
625 Liquid Chromatography–Tandem Mass Spectrometry Method for Fast and Robust  
626 Quantification of Anionic and Aromatic Metabolites. *Anal. Chem.* 82, 4403–4412.
- 627 Buescher, J.M., Liebermeister, W., Jules, M., Uhr, M., Muntel, J., Botella, E., Hessling,  
628 B., Kleijn, R.J., Chat, L.L., Lecoite, F., et al. (2012). Global Network Reorganization  
629 During Dynamic Adaptations of *Bacillus subtilis* Metabolism. *Science* 335, 1099–1103.
- 630 Chakrabarti, A., Miskovic, L., Soh, K.C., and Hatzimanikatis, V. (2013). Towards kinetic  
631 modeling of genome-scale metabolic networks without sacrificing stoichiometric,  
632 thermodynamic and physiological constraints. *Biotechnology Journal* 8, 1043–1057.
- 633 Chassagnole, C., Noisommit-Rizzi, N., Schmid, J.W., Mauch, K., and Reuss, M. (2002).  
634 Dynamic modeling of the central carbon metabolism of *Escherichia coli*. *Biotechnology*  
635 *and Bioengineering* 79, 53–73.

- 636 Chubukov, V., Gerosa, L., Kochanowski, K., and Sauer, U. (2014). Coordination of  
637 microbial metabolism. *Nature Reviews Microbiology* *12*, 327–340.
- 638 Donahue, J.L., Bownas, J.L., Niehaus, W.G., and Larson, T.J. (2000). Purification and  
639 Characterization of glpX-Encoded Fructose 1,6-Bisphosphatase, a New Enzyme of the  
640 Glycerol 3-Phosphate Regulon of Escherichia coli. *Journal of Bacteriology* *182*, 5624–  
641 5627.
- 642 Fenton, A.W., and Reinhart, G.D. (2009). Disentangling the web of allosteric  
643 communication in a homotetramer: heterotropic inhibition in phosphofructokinase from  
644 Escherichia coli. *Biochemistry* *48*, 12323–12328.
- 645 Gerosa, L., Haverkorn van Rijsewijk, B.R.B., Christodoulou, D., Kochanowski, K.,  
646 Schmidt, T.S.B., Noor, E., and Sauer, U. (2015a). Pseudo-transition Analysis Identifies  
647 the Key Regulators of Dynamic Metabolic Adaptations from Steady state Data. *Cell*  
648 *Systems* *1*, 270–282.
- 649 Gerosa, L., Haverkorn van Rijsewijk, B.R.B., Christodoulou, D., Kochanowski, K.,  
650 Schmidt, T.S.B., Noor, E., and Sauer, U. (2015b). Pseudo-transition Analysis Identifies  
651 the Key Regulators of Dynamic Metabolic Adaptations from Steady state Data. *Cell*  
652 *Systems* *1*, 270–282.
- 653 Hines, J.K., Fromm, H.J., and Honzatko, R.B. (2006). Novel Allosteric Activation Site in  
654 Escherichia coli Fructose-1,6-bisphosphatase \*.
- 655 Hui, S., Silverman, J.M., Chen, S.S., Erickson, D.W., Basan, M., Hwa, T., and  
656 Williamson, J.R. (2015). Quantitative proteomic analysis reveals a simple strategy of  
657 global resource allocation in bacteria. *Molecular Systems Biology*.
- 658 Johnson, J.L., and Reinhart, G.D. (1997). Failure of a two-state model to describe the  
659 influence of phospho(enol)pyruvate on phosphofructokinase from Escherichia coli.  
660 *Biochemistry* *36*, 12814–12822.
- 661 Kelley-Loughnane, N., Biolsi, S.A., Gibson, K.M., Lu, G., Hehir, M.J., Phelan, P., and  
662 Kantrowitz, E.R. (2002). Purification, kinetic studies, and homology model of  
663 Escherichia coli fructose-1,6-bisphosphatase. *Biochimica et Biophysica Acta* *1594*, 6–16.
- 664 Kochanowski, K., Volkmer, B., Gerosa, L., Haverkorn van Rijsewijk, B.R., Schmidt, A.,  
665 and Heinemann, M. (2013a). Functioning of a metabolic flux sensor in Escherichia coli.  
666 *Proceedings of the National Academy of Sciences* *110*, 1130–1135.
- 667 Kochanowski, K., Volkmer, B., Gerosa, L., Haverkorn van Rijsewijk, B.R., Schmidt, A.,  
668 and Heinemann, M. (2013b). Functioning of a metabolic flux sensor in Escherichia coli.  
669 *Proceedings of the National Academy of Sciences of the United States of America* *110*,  
670 1130–1135.
- 671 Link, H., Anselment, B., and Weuster-Botz, D. (2008). Leakage of adenylates during  
672 cold methanol/glycerol quenching of Escherichia coli. *Metabolomics* *4*, 240–247.

- 673 Link, H., Kochanowski, K., and Sauer, U. (2013). Systematic identification of allosteric  
674 protein-metabolite interactions that control enzyme activity in vivo. *Nature*  
675 *Biotechnology* *31*, 357–361.
- 676 Nikel, P.I., Chavarría, M., Fuhrer, T., Sauer, U., and Lorenzo, V. de (2015).  
677 *Pseudomonas putida* KT2440 Strain Metabolizes Glucose through a Cycle Formed by  
678 Enzymes of the Entner-Doudoroff, Embden-Meyerhof-Parnas, and Pentose Phosphate  
679 Pathways \*. *Journal of Biological Chemistry* *290*, 25920–25932.
- 680 Noor, E., Eden, E., Milo, R., and Alon, U. (2010). Central Carbon Metabolism as a  
681 Minimal Biochemical Walk between Precursors for Biomass and Energy. *Molecular Cell*  
682 *39*, 809–820.
- 683 Noor, E., Bar-Even, A., Flamholz, A., Reznik, E., Liebermeister, W., and Milo, R.  
684 (2014). Pathway Thermodynamics Highlights Kinetic Obstacles in Central Metabolism.  
685 *PLOS Computational Biology* *10*, e1003483.
- 686 Otterstedt, K., Larsson, C., Bill, R.M., Ståhlberg, A., Boles, E., Hohmann, S., and  
687 Gustafsson, L. (2004). Switching the mode of metabolism in the yeast *Saccharomyces*  
688 *cerevisiae*. *EMBO Reports* *5*, 532–537.
- 689 Pham, A.S., and Reinhart, G.D. (2001). Pre-steady state quantification of the allosteric  
690 influence of *Escherichia coli* phosphofructokinase. *J Biol Chem* *276*, 34388–34395.
- 691 Ramseier, T.M., Bledig, S., Michotey, V., Feghali, R., and Saier, M.H. (1995). The  
692 global regulatory protein FruR modulates the direction of carbon flow in *Escherichia coli*.  
693 *Molecular Microbiology* *16*, 1157–1169.
- 694 Saa, P., and Nielsen, L.K. (2015). A General Framework for Thermodynamically  
695 Consistent Parameterization and Efficient Sampling of Enzymatic Reactions. *PLOS*  
696 *Computational Biology* *11*, e1004195.
- 697 Schink, S.J., Biselli, E., Ammar, C., and Gerland, U. (2019). Death Rate of *E. coli* during  
698 Starvation Is Set by Maintenance Cost and Biomass Recycling. *Cell Systems* *9*, 64-73.e3.
- 699 Soupene, E., van Heeswijk, W.C., Plumbridge, J., Stewart, V., Bertenthal, D., Lee, H.,  
700 Prasad, G., Paliy, O., Charernnoppakul, P., and Kustu, S. (2003). Physiological Studies of  
701 *Escherichia coli* Strain MG1655: Growth Defects and Apparent Cross-Regulation of  
702 Gene Expression. *J Bacteriol* *185*, 5611–5626.
- 703 Stover, C.K., Pham, X.Q., Erwin, A.L., Mizoguchi, S.D., Warrenner, P., Hickey, M.J.,  
704 Brinkman, F.S.L., Hufnagle, W.O., Kowalik, D.J., Lagrou, M., et al. (2000). Complete  
705 genome sequence of *Pseudomonas aeruginosa* PAO1, an opportunistic pathogen. *Nature*  
706 *406*, 959–964.
- 707 Vasilakou, E., Machado, D., Theorell, A., Rocha, I., Nöh, K., Oldiges, M., and Wahl,  
708 S.A. (2016). Current state and challenges for dynamic metabolic modeling. *Current*  
709 *Opinion in Microbiology* *33*, 97–104.

- 710 Vicente, M., and Cánovas, J.L. (1973). Glucolysis in *Pseudomonas putida*: physiological  
711 role of alternative routes from the analysis of defective mutants. *Journal of Bacteriology*  
712 *116*, 908–914.
- 713 Wang, C.H., Stern, I.J., and Gilmour, C.M. (1959). The catabolism of glucose and  
714 gluconate in *Pseudomonas* species. *Archives of Biochemistry and Biophysics* *81*, 489–  
715 492.
- 716 Yang, L., Ebrahim, A., Lloyd, C.J., Saunders, M.A., and Palsson, B.O. (2019).  
717 DynamicME: dynamic simulation and refinement of integrated models of metabolism  
718 and protein expression. *BMC Systems Biology* *13*, 2.
- 719 Zampar, G.G., Kümmel, A., Ewald, J., Jol, S., Niebel, B., Picotti, P., Aebersold, R.,  
720 Sauer, U., Zamboni, N., and Heinemann, M. (2013). Temporal system-level organization  
721 of the switch from glycolytic to gluconeogenic operation in yeast. *Molecular Systems*  
722 *Biology* *9*, 651.
- 723 Zheng, R.L., and Kemp, R.G. (1995). Phosphofructo-1-kinase: Role of Charge  
724 Neutralization in the Active Site. *Biochemical and Biophysical Research*  
725 *Communications* *214*, 765–770.
- 726
