# 1 Glycolysis/gluconeogenesis specialization in microbes is driven by 2 biochemical constraints of flux sensing

3 Severin Josef Schink<sup>1,\*</sup>, Dimitris Christodoulou<sup>1,2,\*</sup>, Avik Mukherjee<sup>1,3</sup>, Edward Athaide<sup>3</sup>, Viktoria  
4 Brunner<sup>2</sup>, Tobias Fuhrer<sup>2</sup>, Gary Andrew Bradshaw<sup>4</sup>, Uwe Sauer<sup>2,#</sup> and Markus Basan<sup>1,#</sup>

5

6 \* Equal contribution

7 <sup>1</sup> Systems Biology Department, Harvard Medical School, 200 Longwood Ave, Boston, MA 02115, USA

8 <sup>2</sup> Institute of Molecular Systems Biology, ETH Zurich, Zurich 8093, Switzerland

9 <sup>3</sup> Applied Mathematics Department, Harvard College, Cambridge, MA 02138, USA

10 <sup>4</sup> Laboratory of Systems Pharmacology, Harvard Program in Therapeutic Science, Harvard Medical School,  
11 200 Longwood Ave, Boston, MA 02115, USA

12 # Correspondence: sauer@imsb.biol.ethz.ch, markus@hms.harvard.edu

13

14

## 15 Running title

16 Substrate specialization in microbes

17

## 18 Keywords

19 Lag time, metabolism, flux sensing, trade-off, specialization

20

## 21 Graphical synopsis

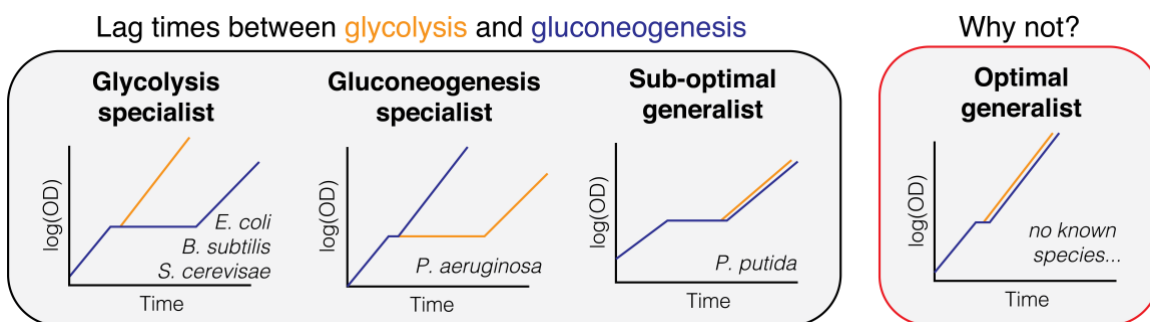

22 **Standfirst text**

23 Microbes face a series of fundamental trade-offs that limit their ability to optimize  
24 simultaneously for both glycolytic and gluconeogenic growth.

25

26 **Bullet points**

- 27 • Lag times between glycolysis and gluconeogenesis show asymmetry in many  
28 microbes: A long lag in one direction, but a short lag in the other.
- 29 • Long lag times are caused by an inability to sense fluxes after nutrient shifts.
- 30 • With existing regulation, lag time asymmetry can only be overcome by reducing  
31 either growth rate or increasing futile cycling in metabolism.

32

33 **Abstract**

34 **Central carbon metabolism is highly conserved across microbial species, but can**  
35 **catalyze very different pathways depending on the organism and their ecological**  
36 **niche. Here, we study the dynamic re-organization of central metabolism after**  
37 **switches between the two major opposing pathway configurations of central carbon**  
38 **metabolism, glycolysis and gluconeogenesis in *Escherichia coli*, *Pseudomonas***  
39 ***aeruginosa* and *Pseudomonas putida*. We combined growth dynamics and dynamic**  
40 **changes of intracellular metabolite levels with a coarse-grained model that integrates**  
41 **fluxes, regulation, protein synthesis and growth and uncovered fundamental**  
42 **limitations of the regulatory network: after nutrient shifts, metabolite concentrations**  
43 **collapse to their equilibrium, rendering the cell unable to sense which direction the**  
44 **flux is supposed to flow through the metabolic network. The cell can partially alleviate**  
45 **this by picking a preferred direction of regulation at the expense of increasing lag**  
46 **times in the opposite direction. Moreover, decreasing both lag times simultaneously**  
47 **comes at the cost of reduced growth rate or higher futile cycling between metabolic**  
48 **enzymes. These three trade-offs can explain why microorganisms specialize for either**  
49 **glycolytic or gluconeogenic substrates and can help elucidate the complex growth**  
50 **patterns exhibited by different microbial species.**

## 51 **Introduction**

52 Whether in nature, microbiomes or infections, microbes frequently encounter changing  
53 environments (Hardcastle and Mann, 1968; Fenchel, 2002; Stocker, 2012; Battin et al.,  
54 2016; Forsyth et al., 2018) and their ability to adapt quickly is a key determinants of fitness.  
55 But in comparison with steady state exponential growth, understanding of the physiology  
56 of growth transitions, in particular what sets the time-scales of adaptation, has remained  
57 largely elusive. For steady state exponential growth, metabolic models have made  
58 substantial progress over the last two decades, elucidating the flux and regulatory networks  
59 that govern the coordination of microbial metabolism (Bennett et al., 2009; Bordbar et al.,  
60 2014; Chubukov et al., 2014; Gerosa et al., 2015a; Link et al., 2013; Noor et al., 2010,  
61 2014; Vasilakou et al., 2016). Such metabolic models were successfully expanded to  
62 dynamic environments (Zampar et al., 2013; Chassagnole et al., 2002; Chakrabarti et al.,  
63 2013; Saa and Nielsen, 2015; Andreozzi et al., 2016; Yang et al., 2019) and used to gather  
64 kinetic information about metabolism, using perturbations (Link et al., 2013), stimulus  
65 response experiments (Chassagnole et al., 2002) or sequential nutrient depletion (Yang et  
66 al., 2019) to validate and improve metabolic models. But, dynamic changes of metabolism  
67 like shifts in growth conditions continue to pose a considerable challenge, and it is still  
68 unclear what determines how long bacteria need to adapt upon a change of the environment.

69  
70 One example of such a switch happens when microbes deplete their primary nutrient.  
71 *Escherichia coli* preferentially utilizes hexose sugars like glucose that are metabolized via  
72 glycolysis (Gerosa et al., 2015b). To maximize growth on sugars, *E. coli* excretes  
73 substantial ‘overflow’ production of acetate, even in the presence of oxygen (Basan et al.,  
74 2015a, 2017). This naturally leads to bi-phasic growth, if no other microbe is around to  
75 utilize this bi-product, where initial utilization of glucose is followed by a switch to acetate.  
76 Similar growth transitions from preferred glycolytic substrates to alcohols and organic  
77 acids ubiquitously occur for microbes in natural environments (Buescher et al., 2012;  
78 Otterstedt et al., 2004; Zampar et al., 2013). Since these fermentation products are all  
79 gluconeogenic, they require a reversal of the flux direction in the glycolysis pathway,  
80 which results in multi-hour lag phases caused by the depletion of metabolite pools  
81 throughout the gluconeogenesis pathway (Basan et al., 2020). Similar long lag times in

82 glycolytic to gluconeogenic shifts were observed for *Bacillus subtilis* and the yeast  
83 *Saccharomyces cerevisiae* (Basan et al., 2020). Shifts in the opposite direction, however,  
84 from gluconeogenic substrates to glycolytic ones, occur much more quickly in *E. coli* and  
85 other preferentially hexose fermenting microbes, in some cases even without detectable lag  
86 phases (Basan et al., 2020).

87

88 In our previous work (Basan et al., 2020), we showed how the growth rate dependence of  
89 enzyme expression leads to a universal relation between lag times and preshift growth rates  
90 and found evidence that futile cycling at irreversible metabolic reactions plays an important  
91 role for causing lag times. However, we were unable to answer the most fundamental  
92 questions raised by these observations: Why are microorganisms like *E. coli* or *S.*  
93 *cerevisiae* unable to overcome lag phases by expressing more metabolic enzymes or  
94 allosteric regulations that turn off futile cycling after metabolic shifts? Given the small  
95 number of enzymes involved in these irreversible reactions, their cost in terms of proteome  
96 allocation is likely minimal. Instead, microbes like *E. coli* appear to be intentionally  
97 limiting enzyme expression and decreasing their growth rates on many glycolytic  
98 substrates (Basan et al., 2017). Moreover, why do shifts from glycolytic to gluconeogenic  
99 conditions result in lag times of many hours, while shifts from gluconeogenic to glycolytic  
100 conditions only take minutes? Given the symmetry of central metabolism, one would  
101 expect similar lag phases in the opposite direction. Is this preference for glycolysis a  
102 fundamental property of central metabolism or rather an evolutionary choice of individual  
103 species? At the core of these questions is a gap in understanding of how central carbon  
104 metabolism adjusts itself to nutritional changes.

105

106 Here, we study growth and metabolite dynamics of *E. coli*, *Pseudomonas aeruginosa* and  
107 *Pseudomonas putida* using a kinetic model of central carbon metabolism to overcome this  
108 challenge. Our model coarse-grains central metabolism to a low number of irreversible and  
109 reversible reactions, which allows us to focus on the dynamics of key metabolites and their  
110 regulatory action. The model couples metabolism to enzyme abundance via allosteric  
111 regulation and enzyme expression to the concentration of regulatory metabolites via  
112 transcriptional regulation and flux dependent protein synthesis. Our formulation of

113 metabolism and growth bridges fast metabolic time scales with slow protein synthesis. As  
114 we demonstrate, our model can explain a major reorganization of metabolism in response  
115 to nutrients shifts: the switching of the directionality of metabolic flux between glycolysis  
116 and gluconeogenesis. Dependent on the required directionality of flux in central  
117 metabolism, enzymes catalyzing the required flux direction are expressed and catalytically  
118 active, while enzymes catalyzing the opposite flux are expressed at low levels and their  
119 activities are repressed by allosteric regulation. This self-organization is key for enabling  
120 fast growth and preventing costly futile cycling between metabolic reactions in opposing  
121 directions, which can inhibit flux and deplete ATP in the process.

122

123 Reestablishing this self-organization after growth shifts is limited by biochemical  
124 constraints to sense fluxes and to regulate accordingly. When metabolite levels transiently  
125 collapse, allosteric and transcriptional regulation cannot distinguish between glycolysis  
126 and gluconeogenesis, rendering the cell unable to sense to the direction of flux. By  
127 choosing the activity of metabolic enzymes at these low metabolite levels to favor one  
128 direction, the cell can enable fast switching at the expense of the other direction. This  
129 choice of direction at low metabolite concentrations becomes the ‘default state’ of central  
130 metabolism and determines the substrate preference.

131

132 According to the model, the preferred direction does not need to be glycolysis, and in  
133 principle gluconeogenic specialists with a gluconeogenic ‘default’ state could have evolved,  
134 too. Indeed, we showed that *P. aeruginosa* shows reversed lag time and growth phenotypes  
135 compared to those of *E. coli*, which verified that long lag times to glycolytic substrates are  
136 caused by the same inability to sense flux after nutrient shifts.

137

## 138 **Results**

### 139 *An integrated, self-consistent kinetic model of glycolysis / gluconeogenesis*

140 In a shift between glycolysis and gluconeogenesis, flux in central metabolism needs to be  
141 reversed. To understand what limits the speed of adaptation between those two modes of  
142 flux, we turn to a theoretical model of central metabolism. But because the complexity of  
143 central metabolism with intertwined regulation at different levels prevents tracing

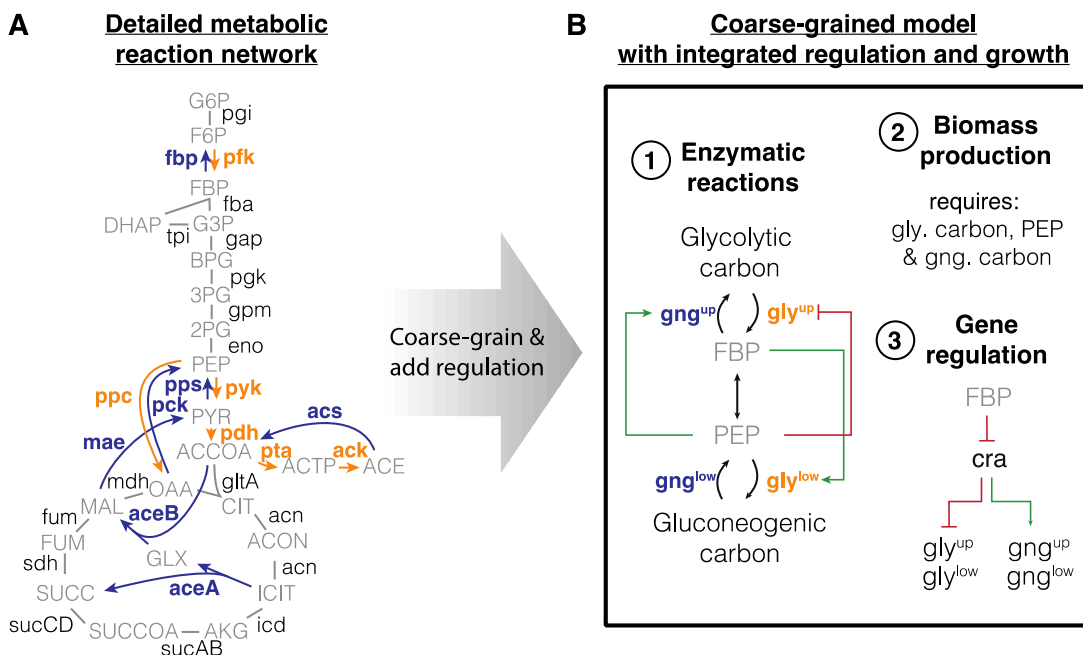

**C Mathematical formulation**

**1 Enzymatic reactions**

Enzyme kinetics (modified Michaelis-Menten)

$$r_i = \phi_i k_{cat,i} \frac{c_i}{c_i + K_{M,i}} (c_i/c_i^*)^{\alpha_i} \quad \text{Eq. (1)}$$

Kinetics of reversible 'super eno' reaction

$$\begin{aligned} r_{eno+} &= k_{eno+}^+ \phi_{eno} c_{FBP} \\ r_{eno-} &= k_{eno-}^- \phi_{eno} c_{PEP}^2 \end{aligned} \quad \text{Eqs. (2, 3)}$$

**2 Biomass production**

$$r_{BM} = k_{cat,BM} \frac{c_{GLY} c_{PEP} c_{GNG}}{c_{GLY}^* c_{PEP}^* c_{GNG}^*} \quad \text{Eq. (4)}$$

**3 Gene regulation**

for gluconeogenic enzymes

$$\frac{d\phi_j}{dt} = \mu \left( \phi_j^* \left( (1 + x_j) - x_j \frac{c_{FBP}(t)}{c_{FBP}^*} \right) - \phi_j(t) \right) \quad \text{Eq. (5)}$$

for glycolytic enzymes

$$\frac{d\phi_i}{dt} = \mu \left( \phi_i^* \left( x_i - (1 - x_i) \frac{c_{FBP}(t)}{c_{FBP}^*} \right) - \phi_i(t) \right) \quad \text{Eq. (6)}$$

144

**Box 1 Integrated kinetic model of central carbon metabolism.** (A) Detailed metabolic reaction network and (B) minimal network of central carbon metabolism. Coarse-graining was done by combining irreversible glycolytic (orange) and gluconeogenic reactions (blue), as well as metabolites. Influx can either occur from glycolytic carbon sources (e.g. glucose/c) or gluconeogenic carbon sources, (e.g. tricarboxylic acid (TCA) cycle carbon like acetate or malate). (1) Gatekeepers to the central section of glycolysis and gluconeogenesis are the two irreversible reactions ( $gly^{up}$ ,  $gng^{up}$  and  $gly^{low}$ ,  $gng^{low}$ ) that feed and drain FBP and PEP. The irreversible reactions are allosterically regulated by FBP (Fructose 1-6-bisphosphate) and PEP (phosphoenolpyruvate), where 'outward' facing reactions are activated (green arrows) and 'inward' facing reactions are repressed (red arrow). (2) Biomass production requires precursors from glycolytic carbons, PEP and gluconeogenic carbons (i.e., from TCA cycle). (3) Glycolytic and gluconeogenic enzymes are regulated by Cra, which is in turn modulated by FBP.

**Box 1 (cont.) (C) Mathematical formulation of the model.** Numbers correspond to features in panel B. (1) Fluxes  $r_i$  of enzymes  $i$  depend on enzyme abundances  $\phi_i$ , catalytic rates  $k_{cat,i}$  and allosteric regulations, modeled as a Hill function below its maximal saturation  $(c_j/c_j^*)^{\alpha_i}$ , where  $c_j$  is the concentration of the regulatory metabolite and  $c_j^*$  is a reference concentration. Reversible fluxes are modeled with simple mass action kinetics. (2) Biomass production is implemented in the model as single reaction that drains all three metabolites simultaneously at catalytic rate  $k_{cat,BM}$ . (3) Enzyme expression depend linearly on FBP concentration  $c_{FBP}$ . Growth rate:  $\mu$ , steady state abundance:  $\phi_i^*$ , steady state concentration  $c_{FBP}^*$  and  $x_i$  &  $x_j$  modulate the sensitivity of regulation to FBP. Glycolytic and gluconeogenic enzymes are produced as part of protein synthesis. Thus in the model, flux through metabolism automatically leads to synthesis of metabolic enzymes and biomass production, resulting in dilution of existing enzymes.

145 quantitative phenotypes to their molecular origins, we sought to focus on the biochemical  
146 pathway topology with its key regulations that differentiate glycolysis and gluconeogenesis  
147 and constructed a minimal model of central metabolism. The model is illustrated in Box 1  
148 and described in detail in the SI. It is based on topology of the biochemical network, the  
149 allosteric and the transcriptional regulation of the key the metabolic proteins of *E. coli*, all  
150 of which have been well characterized (Berger and Evans, 1991; Ramseier et al., 1995;  
151 Johnson and Reinhart, 1997; Pham and Reinhart, 2001; Kelley-Loughnane et al., 2002;  
152 Hines et al., 2006; Fenton and Reinhart, 2009).

153

154 The defining feature of the model is a coarse-graining of the irreversible reactions (one-  
155 directional arrows in ‘orange’ and ‘blue’, Box 1A) in the upper and lower part of central  
156 metabolism into single irreversible reactions (one-directional ‘black’ arrows in Box 1B).  
157 While not irreversible in an absolute sense, so-called irreversible reactions are  
158 thermodynamically favored so much in one direction that they can be effectively  
159 considered as irreversible (Noor et al., 2014). As a result, these irreversible reactions in  
160 central metabolism need to be catalyzed by distinct enzymes that perform distinct reactions  
161 For example, Fructose 6-phosphate (F6P) is converted to Fructose 1-6-bisphosphate (FBP)  
162 by enzyme PfkA using ATP. The opposite direction, FBP to F6P, is performed by a  
163 different enzyme, Fbp, which splits off a phosphate by hydrolysis. Each of the two  
164 reactions follows a free energy gradient and are irreversible. If both enzymes are present

165 and active then the metabolites will be continuously interconverted between F6P and FBP  
166 and in each interconversion one ATP is hydrolyzed to ADP and phosphate. This is a ‘futile  
167 cycle’. It drains the cell’s ATP resource and prevents flux going through the biochemical  
168 network. Because of this importance of irreversible reactions and futile cycling, we  
169 implement irreversible enzymes (‘bold font, blue/orange’ in Box 1A&B) and their  
170 allosteric regulation (‘green’ and ‘red’ arrows in Box 1B) in the model. To successfully  
171 switch flux directions, the cell needs to express irreversible enzymes in the new direction,  
172 up-regulate their activity and repress enzyme activity in the opposing direction. Uptake of  
173 carbons from the environment is modeled as a flux to the substrates of the irreversible  
174 reactions, either glycolytic or gluconeogenic carbons depending on the availability.

175

176 The metabolites ‘sandwiched’ between the irreversible reactions are coarse-grained into  
177 the first and last metabolites of the series of reversible reactions connecting the irreversible  
178 reactions, FBP and PEP (phosphoenolpyruvate). These metabolites regulate the activity  
179 and expression of the irreversible enzymes (Box 1B and SI Sec. 2).

180

181 In total, the model encompasses four irreversible reactions, each regulated allosterically by  
182 either FBP or PEP, and transcriptionally by FBP via Cra, and one reversible reaction that  
183 connects FBP and PEP. We used measured metabolite concentrations for growth on  
184 glucose (Kochanowski et al., 2013a) and Michaelis constants (Berman and Cohn, 1970;  
185 Zheng and Kemp, 1995; Donahue et al., 2000) to constrain enzymatic parameters and  
186 biomass yield (Link et al., 2008) and density (Basan et al., 2015b) on glucose to constrain  
187 fluxes (SI Sec. 4). We used the level of futile cycling in the upper and lower reactions in  
188 exponential glucose growth, which summarize the effect of enzyme abundance and  
189 allosteric regulation, as fitting parameters such that the model reproduces the observed lag  
190 times in this paper; see SI Sec. 4.2 for details.

191

192 While the model in Box 1 was formulated to coarse-grain glycolysis via the Embden-  
193 Meyerhof-Parnas (EMP) pathway, the dominant glycolytic pathway of *E. coli* growing on  
194 glucose (Gerosa et al., 2015a), other glycolytic pathways, such as the Entner-Doudoroff  
195 (ED) or pentose phosphate pathway (PPP), have a similar topology. In ED glycolysis,



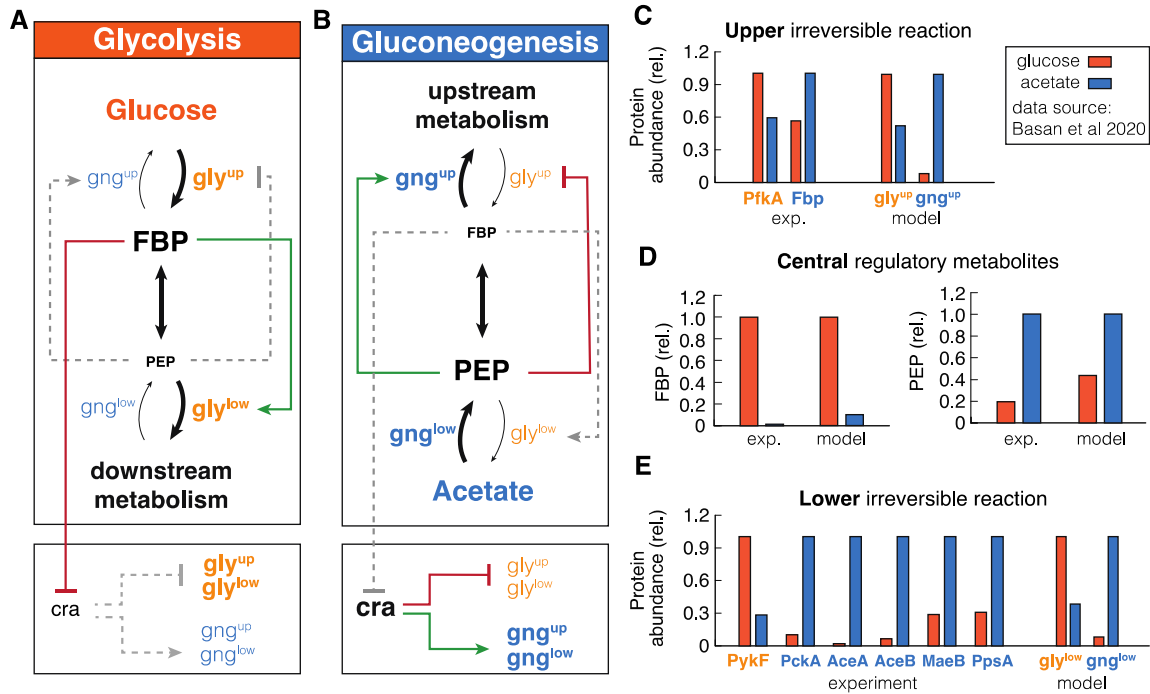

**Figure 1 Self-organization of metabolism in glycolysis and gluconeogenesis.** (A&B) Graphic summary of the reorganization in glycolysis and gluconeogenesis. Linewidth of reactions arrows indicate magnitude of flux. Font size of metabolites and enzymes indicate metabolite concentrations and enzyme abundances, respectively. Active regulation is indicated by red/green color, inactive regulation is grey and dashed. (C, D&E) Calibration of model to experimental data (from (Basan et al., 2020)) metabolite concentrations and enzyme abundances relative to the highest concentration or abundance. Note the striking, differential regulation of FBP and PEP, high in one condition and low in the other.

196 phosphogluconate dehydratase (Edd) and KDPG aldolase (Eda) are irreversible reactions  
 197 that feed into the chain of reversible PEP reactions, analogous to 6-phosphofructokinase (pfk)  
 198 in the EMP pathway. The coarse-grained model thus should capture these alternative  
 199 pathways too.

200

201 *Central carbon metabolism self-organizes in response to substrate availability*

202 To test whether this simple model could recapitulate steady state glycolytic and  
 203 gluconeogenic growth conditions, we calibrated it with published metabolite and  
 204 proteomics data of *E. coli*, which is well-characterized in steady state exponential growth  
 205 on glucose and acetate as sole carbon substrates (Basan et al., 2020). Indeed, the model  
 206 reached distinct steady states for glycolytic and gluconeogenic conditions, which we

207 summarized graphically with font size indicating enzyme and metabolite abundance and  
208 line widths indicating the magnitude of fluxes (Fig. 1A&B). Active regulation is shown in  
209 colored lines, while inactive regulation are grey, dashed lines. We quantitatively compare  
210 enzyme and metabolite abundances to experimental measurements in Fig. 1C-E and find  
211 that the coarse-grained model can describe the reorganization of metabolism well, despite  
212 the simplifications of the metabolic and regulatory networks.

213

214 The simulation helps to understand how central metabolism self-organizes in glycolytic  
215 and gluconeogenic conditions and how allosteric and transcriptional regulation optimize  
216 fluxes and minimize futile cycling during exponential growth. As shown in Fig. 1C, in  
217 ‘orange’, during glycolytic conditions, the simulation reached a steady state with high FBP  
218 levels and low PEP levels. As illustrated in Fig. 1A, the high FBP pool activates lower  
219 glycolysis, while the low PEP pool derepresses upper glycolysis and deactivates upper  
220 gluconeogenesis. This suppression of gluconeogenic fluxes in glycolysis reduces futile  
221 cycling, i.e., circular fluxes at the irreversible reactions, thereby streamlining metabolism.  
222 On a transcriptional level, the high FBP pool represses Cra, which in turn derepresses the  
223 expression of glycolytic enzymes and inhibits the expression of gluconeogenic enzymes.  
224 This results in high levels of glycolytic enzymes and low levels of gluconeogenic enzymes  
225 in the simulation (Fig. 1D&E, right panels).

226

227 In gluconeogenic conditions (‘blue’ in Fig. 1), we find precisely the complementary  
228 configuration of central carbon metabolism. Simulation and experiments show low FBP  
229 and high PEP pools (Fig. 1C). As illustrated in Fig. 1B, high PEP represses upper glycolysis  
230 and activates upper gluconeogenesis, while low FBP deactivates lower glycolysis. Low  
231 FBP also derepresses Cra, which leads to high expression of gluconeogenic enzymes and  
232 low expression of glycolytic enzymes (Fig. 1D, right panels).

233

234 Next we tested if the model could recapitulate how varying growth rates on glycolytic and  
235 gluconeogenic nutrients affects metabolite levels and protein expression in *E. coli* (Gerosa  
236 et al., 2015b; Hui et al., 2015). In particular, it has been shown experimentally that FBP  
237 acts like a flux sensor and FBP concentration linearly increases with glycolytic flux (EV

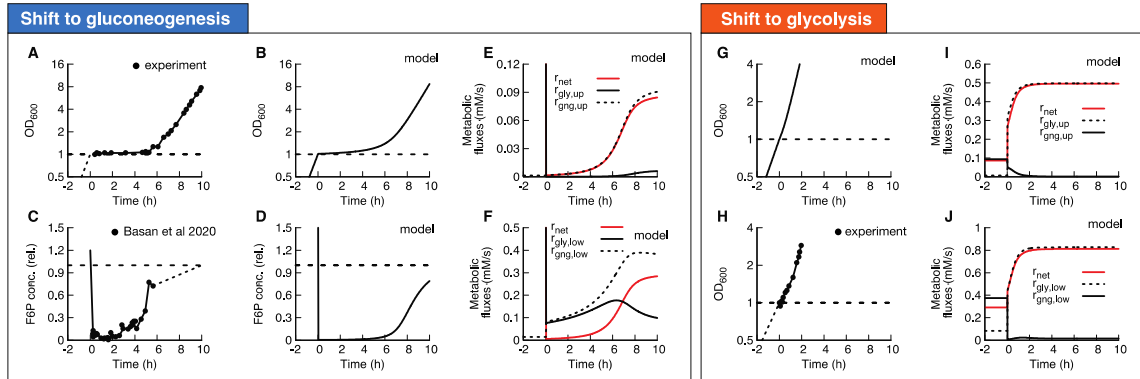

**Figure 2 Shifts between glycolysis and gluconeogenesis.** (A) Experimental and (B) model of optical density after shift of *E. coli* from glucose to acetate. Growth shows a substantial lag before it recovers. (C) Experimental and (D) model of F6P (normalized to the final state) collapses after shift to acetate, and continues to stay low throughout lag phase. Because F6P is an essential precursor for biomass production, this limitation effectively stops biomass growth. Data points shows a single time-series from (Basan et al., 2020). (E&F) Fluxes of all irreversible reactions in units of intracellular concentration per time. Especially fluxes in lower glycolysis/gluconeogenesis are of equal magnitude, leading to a futile cycle, where no net flux (red line) through central carbon metabolism can be established. (G-J) Optical density and metabolic fluxes for the reversed shift from acetate to glucose shows immediate growth and no intermittent futile cycling. The dynamics of all enzyme abundances, regulation and fluxes for both shifts are shown in Appendix Fig. S1-5 in detail. The model also correctly predicts that enzyme abundances only adapt late in the lag phase (Appendix Fig. S6).

238 Fig. 1A) (Kochanowski et al., 2013b), which is recapitulated by our simulation (EV Fig.  
 239 1D), under the condition that enzymes catalyzing the reversible reaction are far from  
 240 saturation. The linear increase of FBP concentration with growth rate results in a linear  
 241 growth rate dependence of gluconeogenic and glycolytic enzyme abundances in the  
 242 simulation, in good agreement with experimental measurements of enzyme abundances  
 243 from proteomics (EV Fig. 1 compare B&C with E&F) (Hui et al., 2015). Together, these  
 244 results show that integrating the transcriptional and allosteric regulation of FBP and PEP  
 245 in the coarse-grained model suffices to describe the major re-configuration of central  
 246 metabolism in glycolysis and gluconeogenesis.

247

248 *Central carbon metabolism of E. coli is primed for switches to glycolysis*

249 Equipped with this model, we next address the mechanistic basis for the extended lag  
 250 phases of *E. coli* upon nutrient shifts from glycolytic to gluconeogenic conditions. When

251 shifted from glucose to acetate *E. coli* shows a lag time with almost no growth for around  
252 5h (Fig. 2A, data: (Basan et al., 2020)). We can reproduce this lag with our model (Fig. 2B,  
253 Appendix Fig. S1-5) when we fit pre-shift futile cycling, which is a measure for enzyme  
254 abundances and allosteric regulations; see SI Sec. 2 for details. All model solutions for *E.*  
255 *coli* shown in this paper are generated with the parameters generated from this fit. The  
256 model captures the slow adaptation of glycolytic and gluconeogenic enzymes, the major  
257 change of which occurs only towards the end of the lag phase (Appendix Fig. S6).  
258 Investigating the origin of the growth arrest in the simulation, we found that during lag  
259 phase, the concentrations of upper glycolytic precursors (which includes Fructose 6-  
260 phosphate (F6P) and Glucose 6-phosphate (G6P)) remained very low compared to their  
261 steady state values, which matches published experimental evidence of F6P measurements  
262 (Basan et al., 2020) (Fig. simulation: 2C, data 2D). This indicates that essential precursors  
263 are limited, and thereby, according to Eq. (4) growth rate during lag phase stalls.

264

265 In the simulation, the F6P limitation is caused by low net fluxes in upper and lower  
266 gluconeogenesis (Fig. 2E&F, red lines). Previously, it was suggested that futile cycling  
267 between gluconeogenic and glycolytic enzymes could contribute to this flux limitation  
268 (Basan et al., 2020), supported by the observation that overexpression of glycolytic  
269 enzymes in upper or lower glycolysis strongly impaired switching and resulted in much  
270 longer lag times (Basan et al., 2020). The simulation allows us to probe the effect of futile  
271 cycling *in silico*, which cannot be directly measured experimentally. Indeed, we found for  
272 our default *E. coli* parameters that residual lower glycolytic flux almost completely  
273 canceled the flux from gluconeogenesis, i.e.,  $r_{\text{gly}}^{\text{low}} \approx r_{\text{gng}}^{\text{low}}$  (solid and dashed black lines in  
274 Fig. 3F), such that net gluconeogenic flux remained close to zero (red line, Fig. 2E&F).  
275 Thus, this futile cycling appears to be the main reason for limiting net flux throughout the  
276 lag phase.

277

278 The biochemical network and regulation are almost completely symmetric with respect to  
279 the direction of flux, so one might naively expect a shift from gluconeogenesis to glycolysis  
280 to also result in a long lag. However, experimentally the shift in the opposite direction from  
281 gluconeogenesis to glycolysis occurs very quickly in *E. coli* (Fig. 2G) (Basan et al., 2020).

282 Our simulations with the standard *E. coli* parameters can recapitulate that central  
283 metabolism adjusted very quickly and growth resumed without a substantial lag phase (Fig.  
284 2H). In striking contrast to the shift to gluconeogenesis, futile cycling played no role in the  
285 shift to glycolysis, because both upper and lower glycolytic fluxes got repressed  
286 immediately after the shift (Fig. 2I-J, solid black line), such that net flux could build up  
287 (Fig. 2I-J, red line). The absence of transient futile cycling, despite the symmetry of  
288 regulation and metabolic reactions, means that, according to the model, it must be the  
289 allosteric and transcriptional regulations that ‘prime’ central metabolism of *E. coli* for the  
290 glycolytic direction.

291

### 292 *Molecular cause of preferential directionality*

293 To understand the molecular cause of the asymmetric response and lag phases, we  
294 investigated the role of allosteric and transcriptional regulation in our simulation. During  
295 steady state growth, the differential regulation during glycolysis and gluconeogenesis is  
296 achieved by PEP and FBP, the metabolites that are “sandwiched” between the two  
297 irreversible reactions and connected by a series of reversible enzymes, coarse-grained in  
298 our model into the ‘super-eno’ enzyme. First, we focused on regulation during exponential  
299 growth and wanted to investigate how the cell achieves differential regulation of glycolytic  
300 and gluconeogenic enzymes using the metabolites FBP and PEP. In equilibrium, forward  
301 and backward reactions would balance, i.e.,  $r_{\text{ENO}+} = r_{\text{ENO}-}$ , and no net flux could run  
302 through central metabolism, meaning that the cell could not grow. Using Eqs. (2&3), the  
303 balance of forward and backward fluxes results in a fixed quadratic dependence of FBP  
304 and PEP in equilibrium,

$$c_{\text{FBP}}^{\text{eq}} = k_{\text{ENO}-} / k_{\text{ENO}+} (c_{\text{PEP}}^{\text{eq}})^2. \quad (7)$$

305 The form of Eq. (7) is specific to F6P converting to FBP being the irreversible step of upper  
306 glycolysis and can change if pathways such as Entner-Doudoroff (ED) or pentose  
307 phosphate pathway (PPP) are dominant.

308

309 Close to the equilibrium, FBP and PEP levels go up and down together, rather than the  
310 opposing directions, as observed for glycolytic and gluconeogenic growth (Fig. 1A&B).

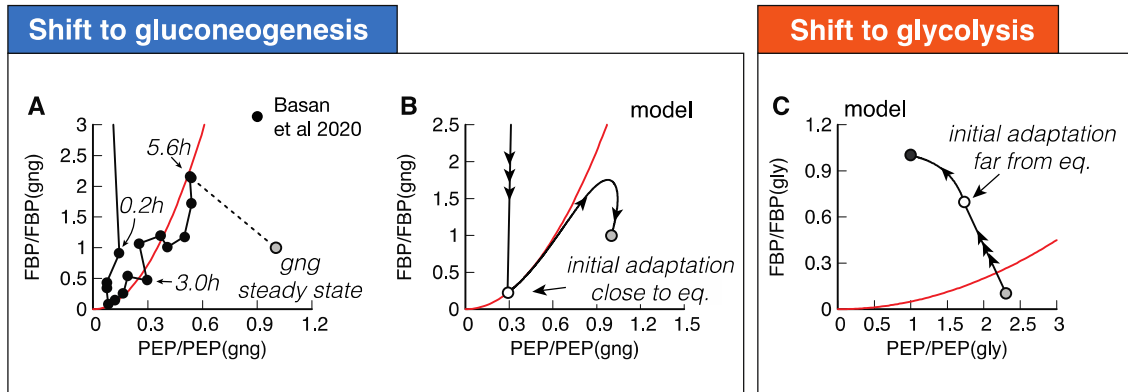

**Figure 3 Molecular cause for asymmetric recovery dynamics in *E. coli*.** (A) Recovery of FBP and PEP of after a shift from glucose to acetate, shows a distinctive joint increase, followed by an overshoot of FBP. Red line is a quadratic guide to the eye. Final acetate steady state is drawn as grey symbol and used to normalize both FBP and PEP levels. Data is a single time-series from (Basan et al., 2020). (B) Model solution of FBP and PEP. After the fast collapse of metabolite levels (triple arrow to white circle), the dynamics closely follows the quadratic FBP-PEP equilibrium Eq. (7). Eventually recovery will diverge away from the equilibrium line, towards the non-equilibrium steady states of gluconeogenesis (grey circle) (C) For a shift to glycolysis, metabolite levels do not collapse, but instead land already far from equilibrium (triple arrow to white circle), such that flux is immediately established, and recovery is quick.

311 This results in low net flux and very slow growth. Hence, for steady state growth, the  
 312 equilibrium must be broken and  $FBP \gg PEP$  or  $FBP \ll PEP$ , such that either glycolytic  
 313 flux is bigger than gluconeogenic or vice-versa ( $r_{ENO+} \gg r_{ENO-}$  and  $r_{ENO+} \ll r_{ENO-}$ ,  
 314 respectively). This is achieved by the irreversible reactions, which drain and supply  
 315 metabolites to the ‘super-eno’. Because of the positive feedback between enzyme activity  
 316 and non-equilibrium of the ‘super-eno’, this regulation topology achieves differential  
 317 regulation during glycolysis and gluconeogenesis. As we observed in the analysis of the  
 318 glycolytic and gluconeogenic steady states (Fig. 1), this differential regulation adjusts  
 319 enzyme levels via transcriptional regulation and suppresses futile cycling at the irreversible  
 320 reactions.

321

322 While regulation of central metabolism efficiently organizes FBP-PEP in a far from  
 323 equilibrium state during exponential growth, nutrient shifts expose the limitations of this  
 324 regulatory system. To understand why, we plot FBP against PEP, with both metabolites

325 normalized to their gluconeogenic steady state (Fig. 3A). We indicated several time-points  
326 along the dynamics, and the final steady state is shown with a grey symbol. Initially, both  
327 FBP and PEP drop close to zero, followed by a very slow joint increase of FBP and PEP  
328 over the course of hours (Fig. 3A). This joint increase, rather than a differential increase,  
329 is the hallmark of a close-to-equilibrium state.

330

331 The slow recovery can be understood from the simulation, which shows that FBP and PEP  
332 proceed close to the equilibrium line of Eq. (7), where growth is slow (Fig. 3B). As a guide  
333 to the eye, we drew an equilibrium parabola in Fig. 3A along the joint increase, too.

334

335 We previously showed that throughout most of the lag phase, higher gluconeogenic flux  
336 from increasing levels of gluconeogenic enzymes is almost completely lost to a  
337 corresponding increase in futile cycling because increasing FBP activates lower glycolysis,  
338 instead of deactivating it (Fig. 2F). The overshoot of FBP in Fig. 3A (data) and Fig. 3B  
339 (model) is what finally allows the cell to establish net flux because it is breaking the  
340 equilibrium: PEP concentration is high enough to activate upper gluconeogenesis  
341 sufficiently to drain FBP via upper gluconeogenesis (see Fig. 2E). Lower FBP then shuts  
342 down futile cycling in lower glycolysis/gluconeogenesis (Fig. 2F), pushing FBP and PEP  
343 concentrations to a state far from the equilibrium line (see Fig. 3B) and allowing the cell  
344 to grow at a faster rate.

345

346 The fundamental difference between shifts to gluconeogenesis and glycolysis in *E. coli* is  
347 that glycolytic shifts immediately land far from equilibrium (Fig. 3C, triple arrow to white  
348 circle), such that cells immediately grow at faster rates, allowing them to express the new  
349 enzymes needed to recover quickly. But why does one direction immediately land far from  
350 equilibrium, while the other lands close to equilibrium?

351

352 *Three trade-offs constrain lag times to glycolysis and gluconeogenesis*

353 The out-of-equilibrium state is caused by net flux going through metabolism. Therefore,  
354 we investigated what causes fluxes not to flow in a uniform direction after shifts to  
355 glycolysis and gluconeogenesis. In principle, metabolite flux brought to the ‘super-eno’

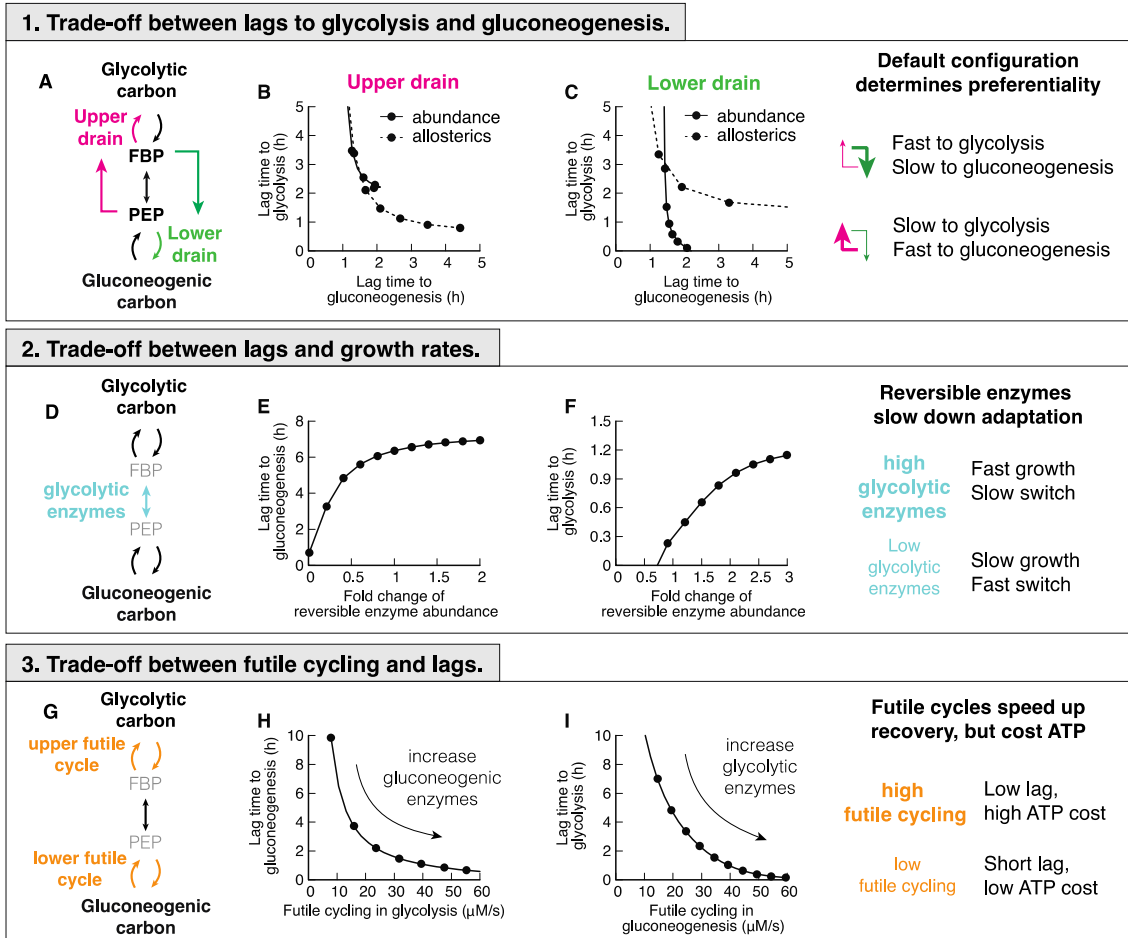

**Figure 4 Trade-offs between glycolysis and gluconeogenesis.** (A) Two drains in central metabolism deplete central metabolites. (B-C) Changing abundance  $\phi$  or allosteric regulation strength  $\alpha$  in either lower or upper drain leads to a shift of lag times, decreasing lags in one direction at the cost of the other. Choosing strength of the drains such that either top or bottom is stronger, will lead to a fast recovery in one direction, and a slow in the other. (D) Reversible enzymes in the central metabolism (coarse-grained here into ‘super-eno’). Abundance of reversible enzymes scale linearly with growth rate [16]. (E-F) Decreasing abundance of reversible enzymes decreases lag times. This effect is due to regulatory metabolites being in a far-from-equilibrium state when abundances are low, which allows differential regulation via FBP and PEP. For high abundance, regulation is weak and lag times long. (G) There are two futile cycles in central metabolism. (H-I) Increasing abundance of enzymes of the opposing direction in pre-shift, e.g. gluconeogenic enzymes in glycolytic growth, increases futile cycling and decreases lag times. Because in futile cycles free energy is dissipated, usually in the form of ATP hydrolysis, futile cycling has an energetic cost.

356 can exit via two drains: upper gluconeogenesis, activated by PEP, and lower glycolysis,  
357 activated by FBP (Fig. 4A). How much flux exits via either drain depends on the current



358 protein abundances and the allosteric regulation. If the allosteric regulation and protein  
359 abundances favor the lower drain, then after a switch to glycolysis, FBP builds up, PEP is  
360 drained and a net flux is immediately accomplished. In a shift to gluconeogenesis, however,  
361 flux that enters central metabolism from the TCA cycle will immediately drain back to the  
362 TCA cycle, leading to an in-and-out flux but no net flux. In this situation, FBP and PEP  
363 stay in equilibrium and the recovery stalls. If on the other hand, the upper drain was favored  
364 over the lower drain, then we would expect the behavior to be reversed and gluconeogenic  
365 flux would be immediately accomplished, while the glycolytic recovery would stall.

366

367 In the simulation, we are able test the hypothesis that the the upper and lower drains  
368 determines the preferential directionality of the central metabolism by varying enzyme  
369 abundances and the strength of allosteric interactions in upper and lower drains *in silico*.  
370 We let metabolism adapt to gluconeogenic and glycolytic conditions and calculate lag  
371 times (Fig. 4B&C). Indeed, we found that a decrease of lag time in one direction led to an  
372 increase of lag time in the opposite direction.

373

374 Varying the outflow from metabolism is not the only determinant of lag times. The set of  
375 reversible enzymes, coarse-grained in our model into the ‘super-eno’, plays another key  
376 role because it interconverts the regulatory metabolites FBP and PEP (Fig. 4D). If this  
377 conversion is fast, the concentrations of FBP and PEP will be close to their equilibrium  
378 relation in Eq. (7), and differential regulation will be impossible. As a result, lag times in  
379 both directions increase if we increase the abundance of reversible reactions (Fig. 4E-F).  
380 This is a counter-intuitive result, as one would have naïvely expected more enzymes to  
381 speed up reactions. But instead, in metabolism more enzymes will collapse the differential  
382 regulation and slow down adaptation rates. This trade-off is unavoidable for fast growing  
383 cells because the cell needs a sufficient amount of reversible glycolytic enzymes to catalyze  
384 metabolic flux.

385

386 Finally, lag times depend on the amount of futile cycling, i.e., the circular conversion of  
387 metabolites in the upper and lower irreversible reactions (Fig. 4G). Increasing the  
388 abundance of gluconeogenic enzymes in glycolytic growth or glycolytic enzymes in

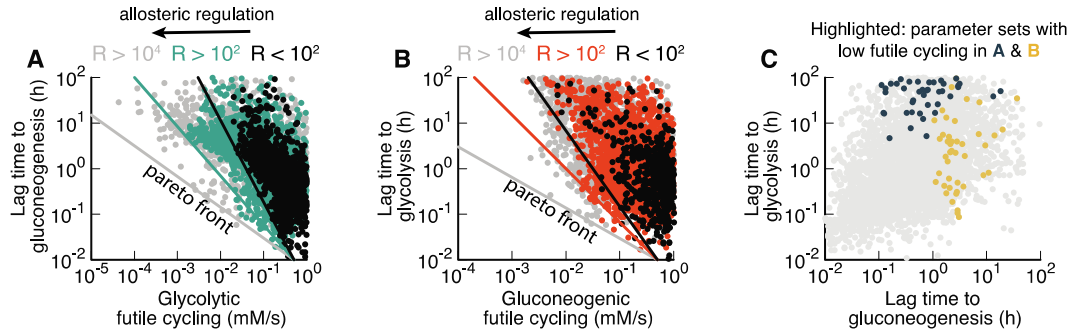

**Figure 5 Large-scale parameter scan reveals Pareto optimality between lag times and futile cycling.** (A-B) Model calculated for randomized sets of protein abundancies, reaction rates, Michaelis constants, allosteric interactions, transcriptional regulation, see SI. Each point corresponds to a parameter set that allows exponential growth on both glycolytic and gluconeogenic carbons, as well switching between both conditions. Data is colored according to the total regulation  $R$ , i.e., the sum of fold-changes of enzyme activities between glycolysis and gluconeogenesis,  $(c_i^{gly}/c_i^{gn.g})^{\alpha_i}$ , where  $c_i^{gly}$  and  $c_i^{gn.g}$  are protein abundancies in glycolysis and gluconeogenesis of protein  $i$  and  $\alpha_i$  the strength of the allosteric regulation. For standard *E. coli* parameters  $R = 23$ .  $R > 10^4$  are likely unphysiological. Lines indicate Pareto front and are drawn by hand. (C) Parameter sets from panels A&B with low futile cycling highlighted over the background of all parameter sets (grey).

389 gluconeogenic growth increases futile cycling but decreases lag times (Fig. 4I&H).  
 390 Because futile cycling dissipates ATP, which is not explicitly built into our model, this  
 391 third trade-off means that organisms can decrease their switching times by sacrificing  
 392 energetic efficiency.

393

394 Are these three trade-offs a fundamental consequence of the regulatory structure or are  
 395 there parameter combinations that avoid the trade-offs by simultaneously enabling rapid  
 396 growth and rapid switching without costly futile cycling? To answer this question we  
 397 performed an extensive scan of model parameters by randomly choosing sets of  
 398 biochemical parameters and simulating the resulting model. Of those parameter sets we  
 399 chose those that allowed steady state growth in both glycolytic and gluconeogenic  
 400 conditions and were able to switch between both states. We plotted the sum of futile cycling  
 401 in the upper and lower irreversible reactions in the pre-shift conditions against the  
 402 subsequent lag times for shifts to gluconeogenesis (Fig. 5A) and to glycolysis (Fig. 5B). In

403 addition, we colored individual parameter sets according to the total allosteric regulation,  
404 defined as the sum of fold-changes of enzyme activities between glycolysis and  
405 gluconeogenesis (black:  $R < 10^2$ , red/green:  $10^4 > R > 10^2$ , grey:  $R > 10^4$ ). These fold  
406 changes are the result of both allosteric and transcriptional variations. We found that  
407 metabolism in the majority of randomly generated models is inefficient and dominated by  
408 futile cycling; only a minority of models were able to reduce futile cycling in glycolysis  
409 and gluconeogenesis. Remarkably, despite probing variations of all possible model  
410 parameters, including Michaelis Menten parameters of enzymes and the strengths of  
411 allosteric and transcriptional regulation, lag times could not be reduced at-will by the cell.  
412 Instead, individual parameter sets with similar allosteric regulation (colors) are bound by a  
413 ‘Pareto frontier’ (solid lines) between futile cycling in preshift conditions and lag times.  
414 Points close to the ‘Pareto frontier’ are Pareto-optimal, meaning that any further decrease  
415 of either parameter must come at the expense of the other. Overall, stronger allosteric  
416 regulation shifted the Pareto frontier but was not able to overcome it. Parameter  
417 combinations that led to low futile cycling in either glycolysis or gluconeogenesis showed  
418 long lag times in at least one condition (Fig. 5C, ‘black’ and ‘yellow’) compared to the  
419 background of all simulated parameter sets (‘grey’). Thus, from this analysis, it seems that  
420 organisms with the regulatory architecture of Box 1 cannot overcome long lag times  
421 without paying a futile cycling cost during steady state growth.

422

#### 423 *Gluconeogenesis specialists are constrained by the same trade-offs*

424 Taken together, the results of Fig. 4&5 suggest that microbial cells cannot achieve fast  
425 growth, low futile cycling and fast adaptation simultaneously in both glycolysis and  
426 gluconeogenesis. Instead, trade-offs between these six extremes constrain the evolutionary  
427 optimization of microbial metabolism, such that any optimal solution is on a surface of a  
428 multidimensional Pareto frontier, where any improvement in one phenotype will come at  
429 the expense of others. To test this hypothesis, we next asked whether a gluconeogenic  
430 specialist would indeed be constrained by the same trade-offs as *E. coli* and other glycolytic  
431 specialists. For this purpose we chose *P. aeruginosa*, a well-studied gluconeogenesis  
432 specialist that has a similar maximal growth rate in minimal medium as *E. coli* (*E. coli*  
433 0.9/h on glucose, *P.aeruginosa* 1.0/h on malate) and grows on a wide variety of substrates.

434

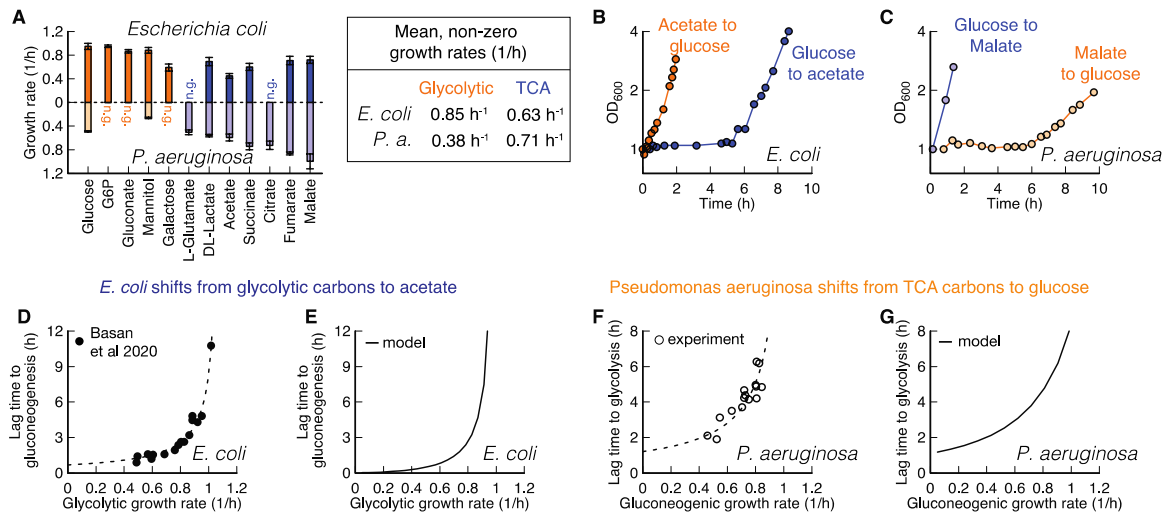

**Figure 6 Comparison of *E. coli* and *P. aeruginosa* during growth and shifts.** (A) Growth rates on glycolytic carbons (orange) are faster for *E. coli* than on gluconeogenic carbons (blue). For *Pseudomonas*, this dependence is reversed. No growth indicated with “n.g”. Data is average of  $n=3$ . Error bar is standard deviation. (B-C) Shifts for *E. coli* and *P. aeruginosa* between glycolytic and gluconeogenic carbon substrates. The preferential order of *P. aeruginosa* is reversed in comparison to *E. coli* (D) *E. coli* shows an increase of lag times to gluconeogenesis with increasing pre-shift growth rate. Lag times diverge around growth rate 1.1/h. Each point is an individual experiment. (E) The model predicts diverging growth rates without further fitting, based on the growth rate dependent expression levels of glycolytic and gluconeogenic enzymes (Fig. 2E-F). (F) *P. aeruginosa* shows a strikingly similar growth rate to lag time dependence as *E. coli*, when switched to glycolysis, with lag times diverging around 1.0/h. Each point is an individual experiment. (G) The model can recapitulate observed *P. aeruginosa* lag times if pre-shift glycolytic enzymes are decreased as a function of pre-shift growth rate.

435 Strikingly, *P. aeruginosa* grows fast on gluconeogenic substrates that are considered ‘poor’  
 436 substrates for *E. coli*, but slow on glycolytic substrates that are considered ‘good’ (Fig. 6A).  
 437 From our model, we would expect that such a specialization for gluconeogenic substrates  
 438 would go along with a reversal in lag phases, too. Indeed, switching between glycolytic  
 439 and gluconeogenic substrates, *P. aeruginosa* exhibits a mirrored pattern of lag phases  
 440 compared to *E. coli* (compare Fig. 6B to 6C), with a long multi-hour lag phase when  
 441 switched to glycolysis.

442

443 To investigate if both *E. coli* and *P. aeruginosa* are constrained by the same trade-offs, we  
444 investigated the effect of pre-shift growth rate, which according to Fig. 4 should have a  
445 negative effect on growth rates. For *E. coli* it is known that shifts from glycolysis to  
446 gluconeogenesis depend on the pre-shift growth rate (Fig. 6D, data: (Basan et al., 2020)),  
447 which we can capture in our model if we take FBP-dependent transcriptional regulation  
448 into account (Fig. 6E). We tested the corresponding lag times for *P. aeruginosa* by varying  
449 gluconeogenic substrates and found a similar dependency in shifts to glycolytic substrates  
450 (Fig. 6F&G). Hence as expected from the model, these findings show that *P. aeruginosa*  
451 is constrained by the same trade-offs as *E. coli*.

452

453 To decipher whether *P. aeruginosa* lag times are constrained on a molecular level by the  
454 same inability to break the equilibrium after nutrient shifts, we investigated metabolite  
455 concentration dynamics in central metabolism. Because *P. aeruginosa* uses the ED  
456 pathway for hexose catabolism (Wang et al., 1959; Vicente and Cánovas, 1973), we needed  
457 to adapt our model slightly. The irreversible reactions in the ED pathway convert  
458 gluconate-6-phosphate to glyceraldehyde 3-phosphate (GAP) and pyruvate. In the  
459 reversible chain of reactions, the first metabolite in glycolysis is thus GAP rather than FBP.  
460 Because GAP is difficult to quantify in mass spec-based metabolomics, we used the closely  
461 related compound dihydroxyacetone phosphate (DHAP) as a proxy. DHAP is in chemical  
462 equilibrium with GAP via a single fast and reversible isomerase (Nikel et al., 2015).

463

464 Analogous to Fig. 3, we plot the dynamics of DHAP versus PEP, normalized to their  
465 glycolytic steady state values, for both shifts (Fig. 7A&B). The dynamics starts and ends  
466 at their respective steady states (grey symbols and dashed lines) and follows the direction  
467 of the indicated arrow. In the chemical equilibrium, DHAP depends linearly on PEP,  
468  $c_{\text{DHAP}}^{\text{eq}} = k_{\text{ENO-}}/k_{\text{ENO+}} c_{\text{PEP}}^{\text{eq}}$ , analogous to Eq. (7), but without the square because of the  
469 1-to-1 stoichiometry between DHAP and PEP. This equilibrium is indicated with a red line.  
470 During the long lag time of *P. aeruginosa* in a shift from malate to glucose, we see that  
471 initially both DHAP and PEP collapse, followed by a slow increase along the equilibrium  
472 line (Fig. 7A). Thus, despite substantial amounts of metabolites being built-up, ‘super-eno’

## *Pseudomonas aeruginosa*

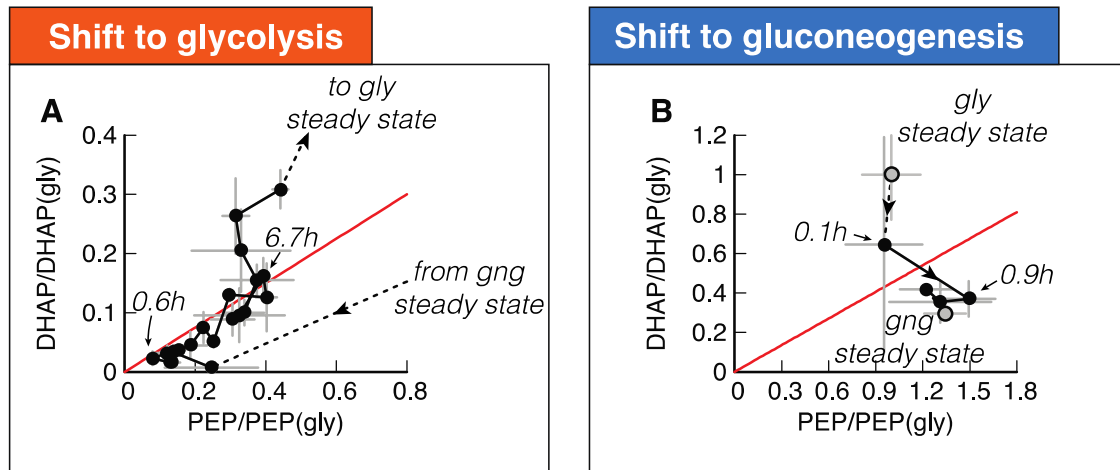

**Figure 7 Metabolite dynamics of *P. aeruginosa* during shifts from malate to glucose and vice-versa. (A) DHAP and PEP during shift from malate ('gng') to glucose ('gly'), normalized to the final glycolytic steady state. Recovery follows a direct proportionality, indicating that central metabolism is close to equilibrium (red line) during the recovery. (B) DHAP and PEP reach the final steady state ('gng') without creeping along the equilibrium line. Data is the average of  $n=3$ , error bars show standard deviation.**

473 remains close to equilibrium. Only after 5.6 h, when the DHAP-PEP dynamics deviates  
474 from the line, the equilibrium is broken and net flux can be achieved.

475

476 In the reverse shift from glucose to malate, *P. aeruginosa*, in contrast, can immediately  
477 establish a non-equilibrium and grow. Thus not only is the asymmetry in lag times reversed  
478 compared to *E. coli*, it is also caused by the same inability to break the equilibrium and  
479 establish net flux in central metabolism.

480

481 But, microbes do not have to be optimized for either direction. One such case is *P. putida*  
482 with moderate lag times of about 1 to 2 h in both directions and only a slight preference for  
483 gluconeogenic substrates (EV Fig. 2). According to the model, such a generalist strategy  
484 can also be a Pareto-optimal solution of the biochemical trade-offs of Fig. 4-5, but it must  
485 come at the expense of no fast recovery (Fig. 4A-C) and reduced growth because of the  
486 trade-offs with reversible enzymes (Fig. 4D-F) and futile cycling (Fig. 4G-I). This is indeed

487 the case for *P. putida*. Lag times in the fast direction are twice as long compared to *P.*  
488 *aeruginosa* and the growth rate is about 20% slower (Fig. S8).

489

## 490 **Discussion**

491 In this work, we presented a coarse-grained kinetic model of central carbon metabolism,  
492 combining key allosteric and transcriptional regulation, as well as biomass production,  
493 enzyme synthesis, and growth. This model elucidates the remarkable capacity of central  
494 carbon metabolism to self-organize in response to substrate availability and flux  
495 requirements. During exponential growth, regulatory metabolites adjust to far-from-  
496 equilibrium steady states, providing the cell with an elegant mechanism to sense the  
497 required directionality of the flux. But the model reveals a key limitation of this flux  
498 sensing. Because after a nutrient shift the concentration of the metabolites collapses to its  
499 equilibrium, the cell becomes ‘blind’ to the direction that the flux is supposed to flow  
500 through the system. By implementing a preferred direction, the cell can partially overcome  
501 lag times in one direction at the cost of increasing lag times in the opposite direction. In  
502 addition, two more trade-offs constrain the ability to simultaneously decrease both lag  
503 times, because it impacts growth rate and the level of futile cycling during growth.

504

505 Microbial species can maximize their proliferation only up to the Pareto-frontier spanned  
506 by these trade-offs, which can lead to evolution of substrate specialization. We validated  
507 this key model prediction in different bacterial species. In *P. aeruginosa* we showed a  
508 reversal of substrate preference as compared to *E. coli*, which coincided with a complete  
509 reversal of the phenomenology of lag phases and metabolite dynamics. In *P. putida* we  
510 found a generalist strategy with moderate lag times in both direction.

511

512 One of the results from our model is that lag times could be substantially reduced by  
513 allowing futile cycling, e.g., by expressing irreversible enzymes for both directions at all  
514 times. The energetic cost of such a wasteful strategy would be relatively low. Because  
515 energy production pathways only constitute a relatively small fraction (around 20% (Basan  
516 et al., 2015c)) of the total cellular proteome and nutrient uptake even smaller (around 1%  
517 for glucose uptake (Schmidt et al., 2016)), the cell could compensate ATP dissipated in

518 futile cycling by increasing nutrient uptake and ATP production at a relatively low  
519 proteome cost. However, experimentally it appears that *E. coli* chooses to keep futile  
520 cycling in check by transcriptionally regulating irreversible enzymes. We thus hypothesize  
521 that the cost of futile cycling must be considered in conditions where the energy budget is  
522 much more limited, such as growth shifts and during starvation. In fact, it has been recently  
523 shown that the energy budget of the cell is around 100-fold smaller during carbon  
524 starvation and that energy dissipation can increase death rates several-fold (Schink et al.,  
525 2019). Therefore, even levels of futile cycling that are modest during steady state growth  
526 should severely affect survival of cells in these conditions

527

528 Our findings indicate that the identified trade-offs are inherent properties of central carbon  
529 metabolism, at least given the existing allosteric and transcriptional regulation. But could  
530 different regulation overcome this limitation? In theory, the cell could use a direct input  
531 signal from the carbon substrate to allosterically inhibit or even degrade undesired  
532 metabolic enzymes. This would uncouple enzyme abundances and activities in pre- and post-  
533 shift growth and circumvent the trade-offs. But with dozens of glycolytic and  
534 gluconeogenic substrates, this would result in a much higher degree of regulatory  
535 complexity, quickly exceeding the regulatory signal capacity that microbes with their small  
536 genomes could sense and integrate. In addition, any wrong decision to degrade or inhibit  
537 metabolic enzymes, for example when combinations of nutrients are present or when  
538 supply is only briefly inhibited, would drastically impair growth. Thus the regulatory  
539 network that microbes use might not be maximizing growth, but at least it is robust and  
540 prevents misregulation.

541

542 Another reason why no such regulation has evolved could be related to the observation that  
543 the regulation of upper and lower glycolysis/gluconeogenesis and directionality of flux are  
544 performed by the metabolite concentrations of FBP and PEP, which are cut off from the  
545 rest of metabolism by irreversible reactions. We propose that the logic for this regulatory  
546 architecture is product inhibition, which ensures that this essential part of central carbon  
547 metabolism is adequately supplied with metabolites, but also ensures that uncontrolled and  
548 potentially toxic accumulation of metabolites does not occur. In fact, because the reactions



549 of upper and lower glycolysis are effectively irreversible, even a slight imbalance in flux  
550 between these enzymes and biomass demand would result in uncontrolled accumulation of  
551 metabolites and, in the absence of a cellular overflow mechanism, these metabolites would  
552 quickly reach toxic concentrations, e.g., via their osmotic activities. As demonstrated by  
553 the simulation, the existing regulation of central metabolism successfully resolves this  
554 problem.

555

556 The regulatory architecture of central metabolism accomplishes efficient regulation of  
557 fluxes and metabolite pools in response to diverse external conditions while avoiding toxic  
558 accumulation of internal metabolites and integrating multiple conflicting signals with only  
559 two regulatory nodes. Central metabolism is a remarkable example of self-organization of  
560 regulatory networks in biology. It provides an elegant solution to the complex, obligatory  
561 problem, posed by the biochemistry of central carbon metabolism. All organisms that need  
562 to switch between glycolytic and gluconeogenic flux modes face this problem, and we  
563 argue that this explains the striking degree of conservation of the phenomenology of shifts  
564 between glycolytic and gluconeogenic conditions that we found in different microbial  
565 species, ranging from *E. coli*, *B. subtilis*, and even wild-type strains of the lower eukaryote  
566 *S. cerevisiae* to the reversed phenotypes in *P. aeruginosa*. Conversely, we believe that the  
567 quantitative phenotypes exhibited by microbes in such idealized growth shift experiments  
568 in the lab can reveal much about their natural environments, ecology and evolutionary  
569 origin.

570

### 571 **Code and data availability**

572 The datasets and computer code produced in this study are available in the following  
573 databases:

- 574 • The MATLAB implementation of the model and the data of all figures are  
575 available on github: [https://github.com/Severin-schink/Glycolysis-](https://github.com/Severin-schink/Glycolysis-gluconeogenesis-switches)  
576 [gluconeogenesis-switches](https://github.com/Severin-schink/Glycolysis-gluconeogenesis-switches)
- 577 • Metabolomics data is available on Metabolights:  
578 [www.ebi.ac.uk/metabolights/MTBLS3887](http://www.ebi.ac.uk/metabolights/MTBLS3887)

579

580 **Conflict of interest statement**

581 The authors declare that they have no conflict of interest.

582

583 **Acknowledgments**

584 We thank Terence Hwa for many helpful discussions and always pointing out unresolved  
585 questions in microbial physiology. We thank Mark Polk for proofreading the manuscript.

586 This project was financed by MIRA grant (5R35GM137895) and an HMS Junior Faculty  
587 Armenise grant via MB and HFSP Long-term fellowship (LT000597/2018) via SJS. EA  
588 was supported by HCRP and the Program for Research in Science and Engineering  
589 (PRISE) of Harvard.

590

591 **Author contributions**

592 SJS, DC, AM, TF, US and MB contributed to the design of the project and writing the  
593 manuscript. SJS, DC, EA and MB performed modelling. AM and MB performed growth  
594 experiments. VB, TF and GAB performed metabolomics measurements.

## 595 **Materials and methods**

### 596 *Bacterial cultures*

597 Strains used in this paper are wild-type *Escherichia coli* K-12 NCM3722 (Soupene et  
598 al., 2003), *Pseudomonas aeruginosa* PAO1 (Stover et al., 2000) and *Pseudomonas*  
599 *putida* NIST0129. The culture medium used in this study is N<sup>-</sup>C<sup>-</sup> minimal medium  
600 (Csonka et al., 1994), containing K<sub>2</sub>SO<sub>4</sub> (1 g), K<sub>2</sub>HPO<sub>4</sub>·3H<sub>2</sub>O (17.7 g), KH<sub>2</sub>PO<sub>4</sub> (4.7  
601 g), MgSO<sub>4</sub>·7H<sub>2</sub>O (0.1 g) and NaCl (2.5 g) per liter. The medium was supplemented  
602 with 20 mM NH<sub>4</sub>Cl, as the nitrogen source, and either of the following carbon sources:  
603 20 mM Glucose-6-phosphate, 20 mM gluconate, 0.2 % glucose, 20 mM succinate, 20  
604 mM acetate, 20 mM citrate, 20 mM malate or 20 mM fumarate.

605

606 Growth was then carried out at 37 °C in a water bath shaker at 200 rpm, in silicate  
607 glass tubes (Fisher Scientific) closed with plastic caps (Kim Kap). Cultures spent at  
608 least 10 doublings in exponential growth in pre-shift medium. For growth shifts,  
609 cultured were transferred to a filter paper and washed twice with pre-warmed post-  
610 shift medium. Cells were resuspended from the filter paper in post-shift medium and  
611 subsequently diluted to an OD of about 0.05.

612

### 613 *Preparation of metabolite samples*

614 Each metabolite sample was filtered, and the filter was immediately plunged in 4 ml  
615 ice cold Methanol (40 %)+Acetonitrile (40 %)+water (20 %) and kept in 50 ml tube.  
616 Bacteria were washed off from the filter by pipetting, and the solution was  
617 transferred to 15 ml tube. Original 50 ml tube was further washed with 4 ml of ice

618 cold Methanol+Acetonitrile+Water mix and added to respective 15 ml tube (total 8  
619 ml). Each sample was dried by speed vac, and dried extracts were sent for Mass spec  
620 analysis.

621

### 622 *Quantification of intracellular metabolite levels*

623 The dried metabolite extracts were resuspended in 150  $\mu$ L MilliQ water, centrifuged  
624 at 4  $^{\circ}$ C, 10,000 rpm for 10 min, and 100  $\mu$ L precipitate-free supernatant was  
625 transferred to a master 96-well plate. 25  $\mu$ L of the master plate were transferred to a  
626 96-well plate for acquisition, of which 10  $\mu$ L were injected into a Waters Acquity  
627 ultraperformance liquid chromatography (UPLC) system (Waters) with a Waters  
628 Acquity T3 column coupled to a Thermo TSQ Quantum Ultra triple quadrupole  
629 instrument (Thermo Fisher Scientific) as described previously (Buescher et al., 2010).  
630 Compound separation was achieved using a gradient of two mobile phases: A, 10 mM  
631 tributylamine (ion-pairing agent), 15 mM acetate and 5% (v/v) methanol in water;  
632 and B, 2-propanol. Data was acquired in negative ionization mode using previously  
633 published MRM settings (Buescher et al., 2010). Peak integration was performed  
634 using an in-house software based on MatLab. A dilution series of standards was used  
635 to calculate the concentrations of metabolites in the samples. The final intracellular  
636 concentration was calculated from the sample concentration and the extracted  
637 intracellular volume.

638

### 639 *Theoretical modelling*

640 The integrated minimal model of metabolism and growth was implemented in  
641 MATLAB using the SimBiology toolbox and is described in detail in the Supporting  
642 Information.  
643

644 **References**

- 645 Andreozzi, S., Miskovic, L., and Hatzimanikatis, V. (2016). iSCHRUNK – In Silico  
646 Approach to Characterization and Reduction of Uncertainty in the Kinetic Models of  
647 Genome-scale Metabolic Networks. *Metabolic Engineering* 33, 158–168.
- 648 Basan, M., Hui, S., Okano, H., Zhang, Z., Shen, Y., Williamson, J.R., and Hwa, T.  
649 (2015a). Overflow metabolism in *Escherichia coli* results from efficient proteome  
650 allocation. *Nature* 528.
- 651 Basan, M., Zhu, M., Dai, X., Warren, M., Sévin, D., Wang, Y.-P., and Hwa, T. (2015b).  
652 Inflating bacterial cells by increased protein synthesis. *Mol Syst Biol* 11.
- 653 Basan, M., Hui, S., Okano, H., Zhang, Z., Shen, Y., Williamson, J.R., and Hwa, T.  
654 (2015c). Overflow metabolism in *Escherichia coli* results from efficient proteome  
655 allocation. *Nature* 528, 99–104.
- 656 Basan, M., Hui, S., and Williamson, J.R. (2017). ArcA overexpression induces  
657 fermentation and results in enhanced growth rates of *E. coli*. *Scientific Reports* 7.
- 658 Basan, M., Honda, T., Christodoulou, D., Hörl, M., Chang, Y.-F., Leoncini, E.,  
659 Mukherjee, A., Okano, H., Taylor, B.R., Silverman, J.M., et al. (2020). A universal trade-  
660 off between growth and lag in fluctuating environments. *Nature*.
- 661 Battin, T.J., Besemer, K., Bengtsson, M.M., Romani, A.M., and Packmann, A.I. (2016).  
662 The ecology and biogeochemistry of stream biofilms. *Nat Rev Microbiol* 14, 251–263.
- 663 Bennett, B.D., Kimball, E.H., Gao, M., Osterhout, R., Van Dien, S.J., and Rabinowitz,  
664 J.D. (2009). Absolute metabolite concentrations and implied enzyme active site  
665 occupancy in *Escherichia coli*. *Nature Chemical Biology* 5, 593–599.
- 666 Berger, S.A., and Evans, P.R. (1991). Steady-state fluorescence of *Escherichia coli*  
667 phosphofructokinase reveals a regulatory role for ATP. *Biochemistry* 30, 8477–8480.
- 668 Berman, K.M., and Cohn, M. (1970). Phosphoenolpyruvate Synthetase of *Escherichia*  
669 *coli*. *Journal of Biological Chemistry* 245, 5309–5318.

- 670 Bordbar, A., Monk, J.M., King, Z.A., and Palsson, B.O. (2014). Constraint-based models  
671 predict metabolic and associated cellular functions. *Nature Reviews Genetics* *15*, 107–  
672 120.
- 673 Buescher, J.M., Moco, S., Sauer, U., and Zamboni, N. (2010). Ultrahigh Performance  
674 Liquid Chromatography–Tandem Mass Spectrometry Method for Fast and Robust  
675 Quantification of Anionic and Aromatic Metabolites. *Anal. Chem.* *82*, 4403–4412.
- 676 Buescher, J.M., Liebermeister, W., Jules, M., Uhr, M., Muntel, J., Botella, E., Hessling,  
677 B., Kleijn, R.J., Chat, L.L., Lecointe, F., et al. (2012). Global Network Reorganization  
678 During Dynamic Adaptations of *Bacillus subtilis* Metabolism. *Science* *335*, 1099–1103.
- 679 Chakrabarti, A., Miskovic, L., Soh, K.C., and Hatzimanikatis, V. (2013). Towards kinetic  
680 modeling of genome-scale metabolic networks without sacrificing stoichiometric,  
681 thermodynamic and physiological constraints. *Biotechnology Journal* *8*, 1043–1057.
- 682 Chassagnole, C., Noisommit - Rizzi, N., Schmid, J.W., Mauch, K., and Reuss, M.  
683 (2002). Dynamic modeling of the central carbon metabolism of *Escherichia coli*.  
684 *Biotechnology and Bioengineering* *79*, 53–73.
- 685 Chubukov, V., Gerosa, L., Kochanowski, K., and Sauer, U. (2014). Coordination of  
686 microbial metabolism. *Nature Reviews Microbiology* *12*, 327–340.
- 687 Donahue, J.L., Bownas, J.L., Niehaus, W.G., and Larson, T.J. (2000). Purification and  
688 Characterization of *glpX*-Encoded Fructose 1,6-Bisphosphatase, a New Enzyme of the  
689 Glycerol 3-Phosphate Regulon of *Escherichia coli*. *Journal of Bacteriology* *182*, 5624–  
690 5627.
- 691 Fenchel, T. (2002). Microbial Behavior in a Heterogeneous World. *Science* *296*, 1068–  
692 1071.
- 693 Fenton, A.W., and Reinhart, G.D. (2009). Disentangling the web of allosteric  
694 communication in a homotetramer: heterotropic inhibition in phosphofructokinase from  
695 *Escherichia coli*. *Biochemistry* *48*, 12323–12328.

- 696 Forsyth, V.S., Armbruster, C.E., Smith, S.N., Pirani, A., Springman, A.C., Walters, M.S.,  
697 Nielubowicz, G.R., Himpsl, S.D., Snitkin, E.S., and Mobley, H.L.T. (2018). Rapid  
698 Growth of Uropathogenic *Escherichia coli* during Human Urinary Tract Infection. *MBio*  
699 *9*, e00186-18.
- 700 Gerosa, L., Haverkorn van Rijsewijk, B.R.B., Christodoulou, D., Kochanowski, K.,  
701 Schmidt, T.S.B., Noor, E., and Sauer, U. (2015a). Pseudo-transition Analysis Identifies  
702 the Key Regulators of Dynamic Metabolic Adaptations from Steady-State Data. *Cell*  
703 *Systems 1*, 270–282.
- 704 Gerosa, L., Haverkorn van Rijsewijk, B.R.B., Christodoulou, D., Kochanowski, K.,  
705 Schmidt, T.S.B., Noor, E., and Sauer, U. (2015b). Pseudo-transition Analysis Identifies  
706 the Key Regulators of Dynamic Metabolic Adaptations from Steady-State Data. *Cell*  
707 *Systems 1*, 270–282.
- 708 Hardcastle, J.D., and Mann, C.V. (1968). Study of large bowel peristalsis. *Gut 9*, 512–  
709 520.
- 710 Hines, J.K., Fromm, H.J., and Honzatko, R.B. (2006). Novel Allosteric Activation Site in  
711 *Escherichia coli* Fructose-1,6-bisphosphatase \*.
- 712 Hui, S., Silverman, J.M., Chen, S.S., Erickson, D.W., Basan, M., Hwa, T., and  
713 Williamson, J.R. (2015). Quantitative proteomic analysis reveals a simple strategy of  
714 global resource allocation in bacteria. *Molecular Systems Biology*.
- 715 Johnson, J.L., and Reinhart, G.D. (1997). Failure of a two-state model to describe the  
716 influence of phospho(enol)pyruvate on phosphofructokinase from *Escherichia coli*.  
717 *Biochemistry 36*, 12814–12822.
- 718 Kelley-Loughnane, N., Biolsi, S.A., Gibson, K.M., Lu, G., Hehir, M.J., Phelan, P., and  
719 Kantrowitz, E.R. (2002). Purification, kinetic studies, and homology model of  
720 *Escherichia coli* fructose-1,6-bisphosphatase. *Biochimica et Biophysica Acta 1594*, 6–16.



- 721 Kochanowski, K., Volkmer, B., Gerosa, L., Haverkorn van Rijsewijk, B.R., Schmidt, A.,  
722 and Heinemann, M. (2013a). Functioning of a metabolic flux sensor in *Escherichia coli*.  
723 *Proceedings of the National Academy of Sciences* *110*, 1130–1135.
- 724 Kochanowski, K., Volkmer, B., Gerosa, L., Haverkorn van Rijsewijk, B.R., Schmidt, A.,  
725 and Heinemann, M. (2013b). Functioning of a metabolic flux sensor in *Escherichia coli*.  
726 *Proceedings of the National Academy of Sciences of the United States of America* *110*,  
727 1130–1135.
- 728 Link, H., Anselment, B., and Weuster-Botz, D. (2008). Leakage of adenylates during  
729 cold methanol/glycerol quenching of *Escherichia coli*. *Metabolomics* *4*, 240–247.
- 730 Link, H., Kochanowski, K., and Sauer, U. (2013). Systematic identification of allosteric  
731 protein-metabolite interactions that control enzyme activity in vivo. *Nature*  
732 *Biotechnology* *31*, 357–361.
- 733 Nikel, P.I., Chavarría, M., Fuhrer, T., Sauer, U., and Lorenzo, V. de (2015).  
734 *Pseudomonas putida* KT2440 Strain Metabolizes Glucose through a Cycle Formed by  
735 Enzymes of the Entner-Doudoroff, Embden-Meyerhof-Parnas, and Pentose Phosphate  
736 Pathways \*. *Journal of Biological Chemistry* *290*, 25920–25932.
- 737 Noor, E., Eden, E., Milo, R., and Alon, U. (2010). Central Carbon Metabolism as a  
738 Minimal Biochemical Walk between Precursors for Biomass and Energy. *Molecular Cell*  
739 *39*, 809–820.
- 740 Noor, E., Bar-Even, A., Flamholz, A., Reznik, E., Liebermeister, W., and Milo, R.  
741 (2014). Pathway Thermodynamics Highlights Kinetic Obstacles in Central Metabolism.  
742 *PLOS Computational Biology* *10*, e1003483.
- 743 Otterstedt, K., Larsson, C., Bill, R.M., Ståhlberg, A., Boles, E., Hohmann, S., and  
744 Gustafsson, L. (2004). Switching the mode of metabolism in the yeast *Saccharomyces*  
745 *cerevisiae*. *EMBO Reports* *5*, 532–537.
- 746 Pham, A.S., and Reinhart, G.D. (2001). Pre-steady state quantification of the allosteric  
747 influence of *Escherichia coli* phosphofructokinase. *J Biol Chem* *276*, 34388–34395.

- 748 Ramseier, T.M., Bledig, S., Michotey, V., Feghali, R., and Saier, M.H. (1995). The  
749 global regulatory protein FruR modulates the direction of carbon flow in *Escherichia coli*.  
750 *Molecular Microbiology* *16*, 1157–1169.
- 751 Saa, P., and Nielsen, L.K. (2015). A General Framework for Thermodynamically  
752 Consistent Parameterization and Efficient Sampling of Enzymatic Reactions. *PLOS*  
753 *Computational Biology* *11*, e1004195.
- 754 Schink, S.J., Biselli, E., Ammar, C., and Gerland, U. (2019). Death Rate of *E. coli* during  
755 Starvation Is Set by Maintenance Cost and Biomass Recycling. *Cell Systems* *9*, 64-73.e3.
- 756 Schmidt, A., Kochanowski, K., Vedelaar, S., Ahrné, E., Volkmer, B., Callipo, L.,  
757 Knoops, K., Bauer, M., Aebersold, R., and Heinemann, M. (2016). The quantitative and  
758 condition-dependent *Escherichia coli* proteome. *Nat Biotechnol* *34*, 104–110.
- 759 Soupene, E., van Heeswijk, W.C., Plumbridge, J., Stewart, V., Bertenthal, D., Lee, H.,  
760 Prasad, G., Paliy, O., Charernnoppakul, P., and Kustu, S. (2003). Physiological Studies of  
761 *Escherichia coli* Strain MG1655: Growth Defects and Apparent Cross-Regulation of  
762 Gene Expression. *J Bacteriol* *185*, 5611–5626.
- 763 Stocker, R. (2012). Marine Microbes See a Sea of Gradients. *Science* *338*, 628–633.
- 764 Stover, C.K., Pham, X.Q., Erwin, A.L., Mizoguchi, S.D., Warrener, P., Hickey, M.J.,  
765 Brinkman, F.S.L., Hufnagle, W.O., Kowalik, D.J., Lagrou, M., et al. (2000). Complete  
766 genome sequence of *Pseudomonas aeruginosa* PAO1, an opportunistic pathogen. *Nature*  
767 *406*, 959–964.
- 768 Vasilakou, E., Machado, D., Theorell, A., Rocha, I., Nöh, K., Oldiges, M., and Wahl,  
769 S.A. (2016). Current state and challenges for dynamic metabolic modeling. *Current*  
770 *Opinion in Microbiology* *33*, 97–104.
- 771 Vicente, M., and Cánovas, J.L. (1973). Glucolysis in *Pseudomonas putida*: physiological  
772 role of alternative routes from the analysis of defective mutants. *Journal of Bacteriology*  
773 *116*, 908–914.

- 774 Wang, C.H., Stern, I.J., and Gilmour, C.M. (1959). The catabolism of glucose and  
775 gluconate in *Pseudomonas* species. *Archives of Biochemistry and Biophysics* *81*, 489–  
776 492.
- 777 Yang, L., Ebrahim, A., Lloyd, C.J., Saunders, M.A., and Palsson, B.O. (2019).  
778 DynamicME: dynamic simulation and refinement of integrated models of metabolism  
779 and protein expression. *BMC Systems Biology* *13*, 2.
- 780 Zampar, G.G., Kümmel, A., Ewald, J., Jol, S., Niebel, B., Picotti, P., Aebersold, R.,  
781 Sauer, U., Zamboni, N., and Heinemann, M. (2013). Temporal system-level organization  
782 of the switch from glycolytic to gluconeogenic operation in yeast. *Molecular Systems*  
783 *Biology* *9*, 651.
- 784 Zheng, R.L., and Kemp, R.G. (1995). Phosphofructo-1-kinase: Role of Charge  
785 Neutralization in the Active Site. *Biochemical and Biophysical Research*  
786 *Communications* *214*, 765–770.
- 787

788 **Expanded View figures**

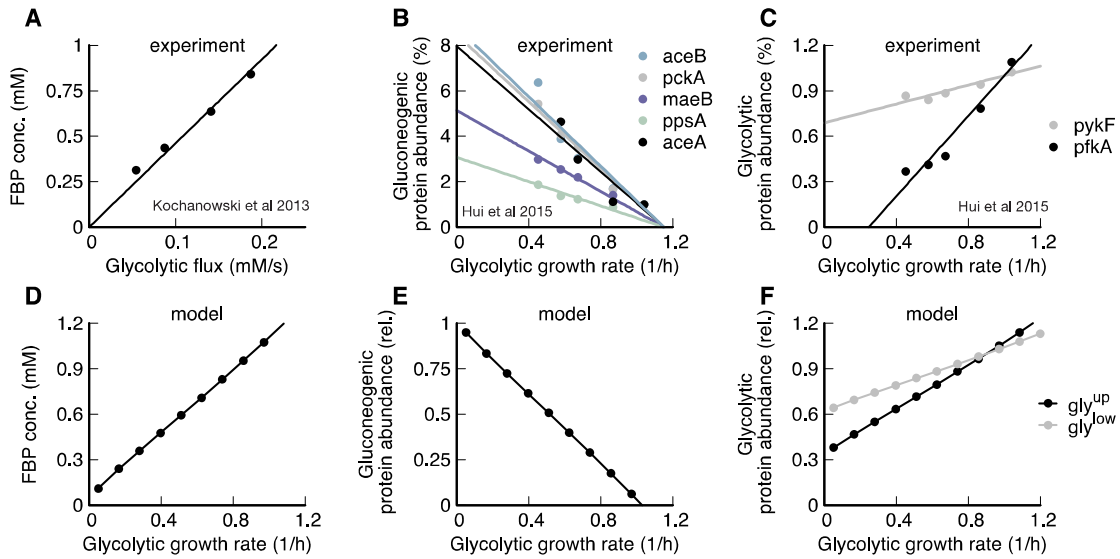

789

790 *EV Figure 1. Metabolic state depends on growth rate. (A) During glycolytic growth,*  
 791 *FBP linearly increases with growth rate. Data: Ref. (Kochanowski et al., 2013b). (B)*  
 792 *Gluconeogenic enzymes decrease linearly with glycolytic growth rate. Data: (Hui et al.,*  
 793 *2015). (C) Glycolytic enzymes increase linearly with glycolytic growth rate. Data: Ref.*  
 794 *(Hui et al., 2015). (D-F) Simulation results recapitulate experimental evidence.*

795

796

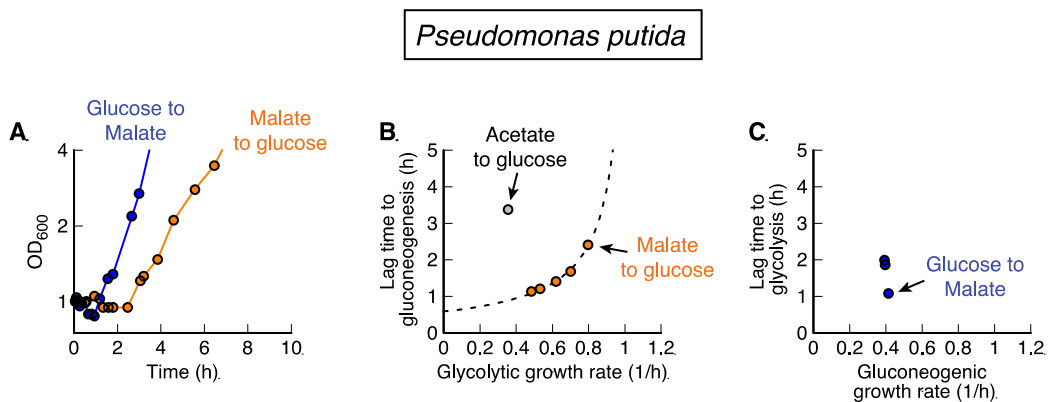

797

798

**EV Figure 2 *Pseudomonas putida* shifts between glycolytic and gluconeogenic carbon**

799

**substrates. (A) For shifts between glucose and malate, and vice-versa, *P. putida* shows**

800

**moderate lag times in both directions. (B) Lag times depend on pre-shift growth rate for**

801

**glycolysis to gluconeogenesis, with acetate to glucose being a clear outlier. (C) Lag times**

802

**for gluconeogenic to glycolytic shifts are of the same magnitude as for the reverse**

803

**direction. Compared to *P. aeruginosa*, *P. putida* shows longer lags from glucose to**

804

**malate (0.55h compared to 1.1h) and slower growth on the fastest carbon (malate) (1.0/h**

805

**compared to 0.8/h)**

806
